# Supplementary material for: β C–H di-halogenation via iterative hydrogen atom transfer
Source: Royal Society of Chemistry journal article supplement (doi:10.1039/c8sc01214h), 2018-01-01

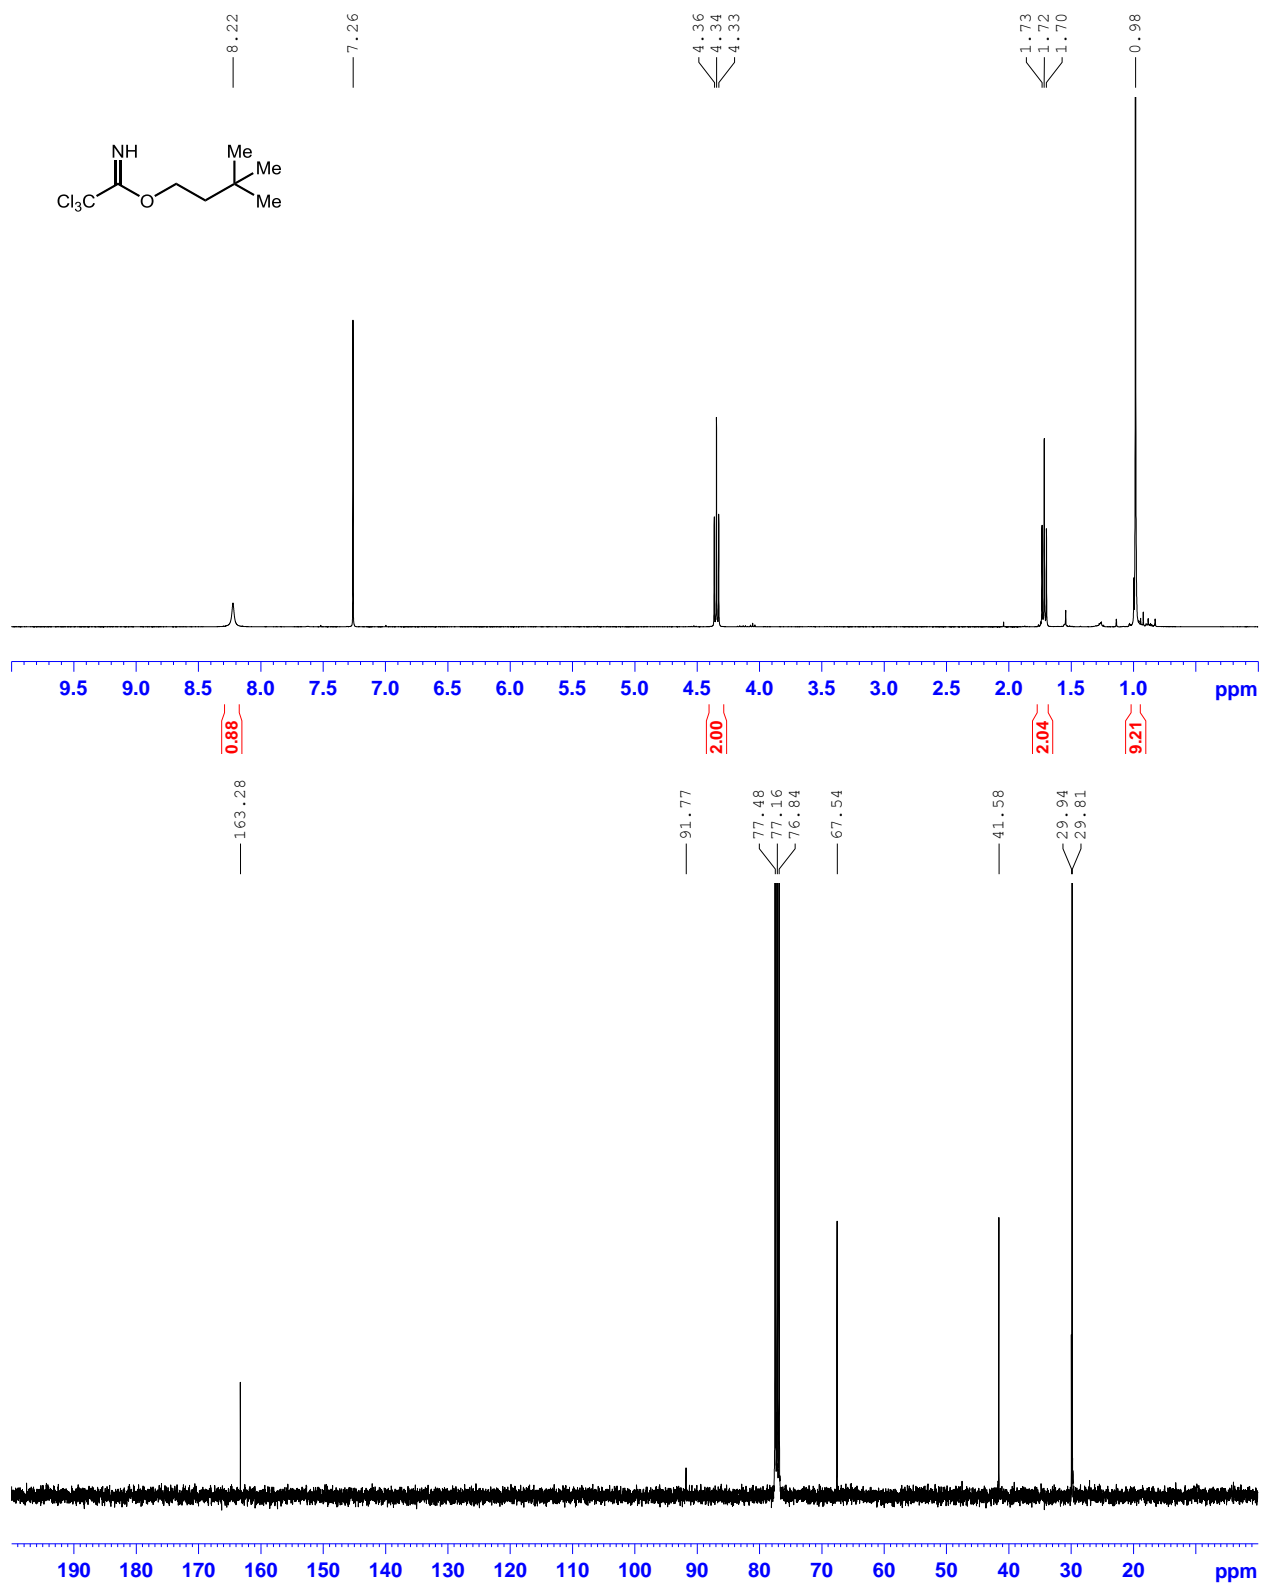

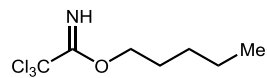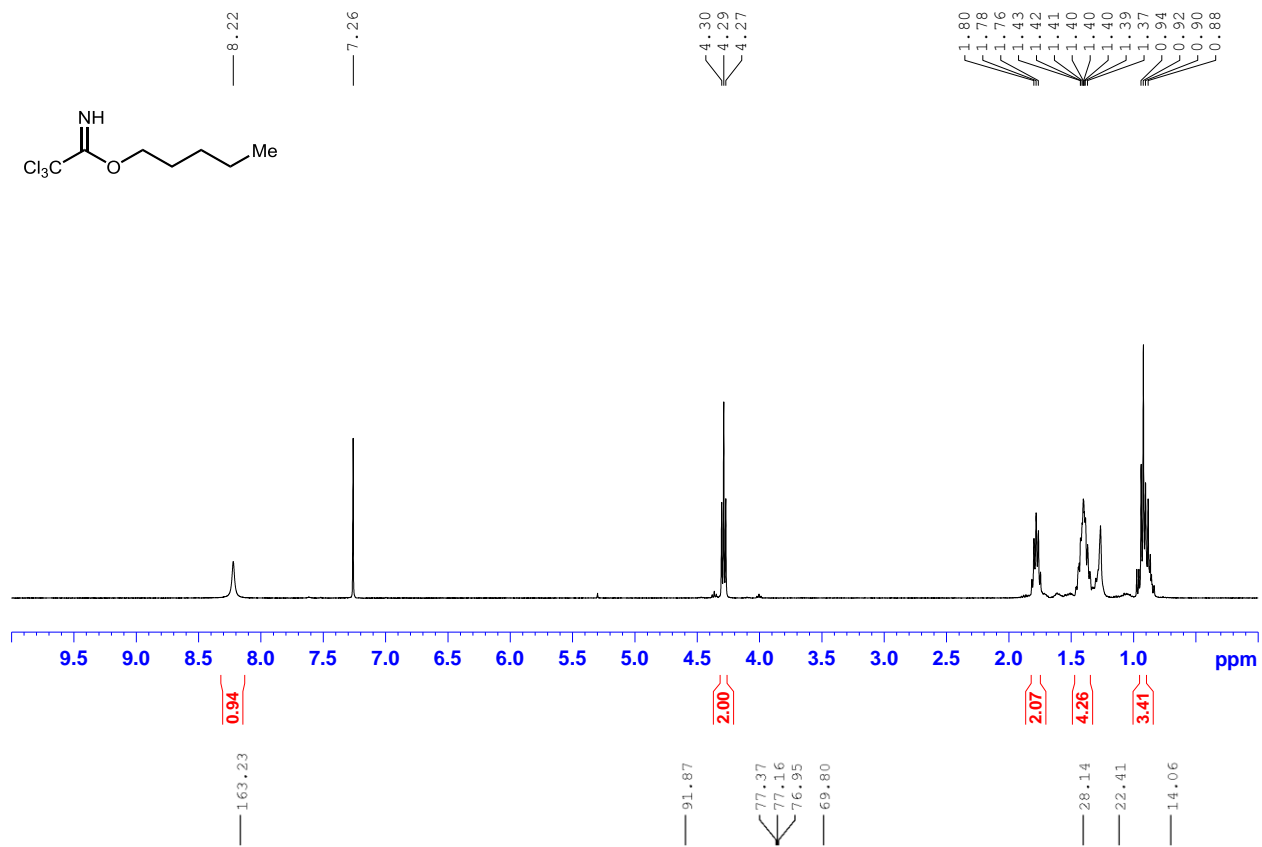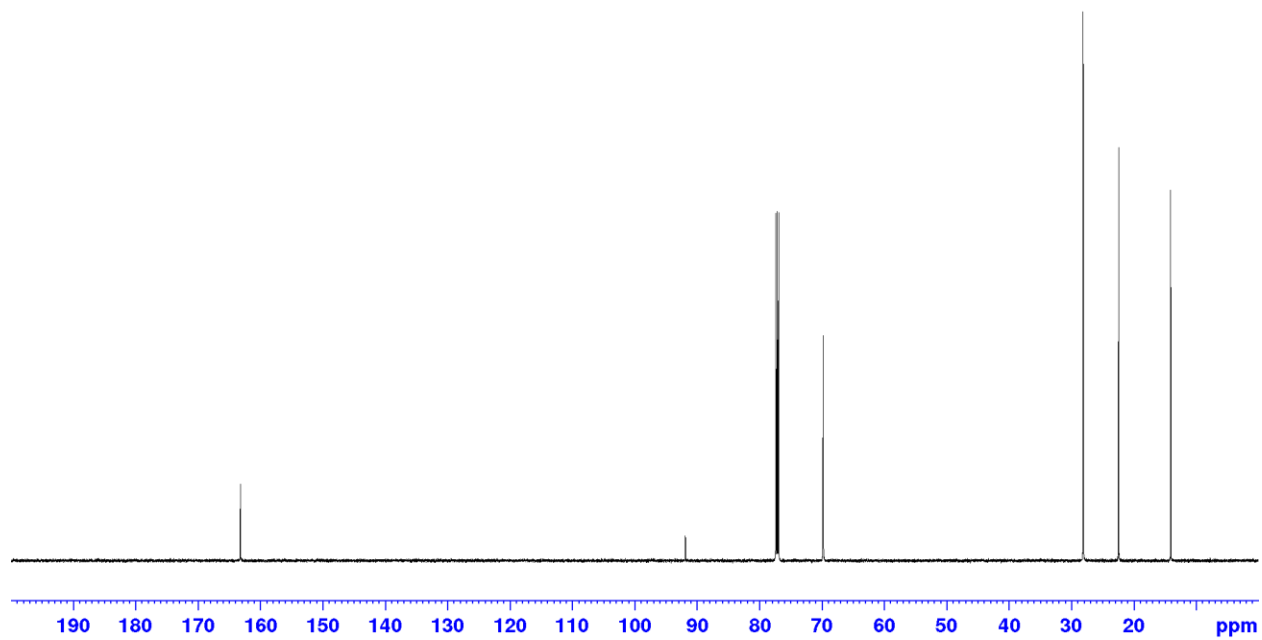

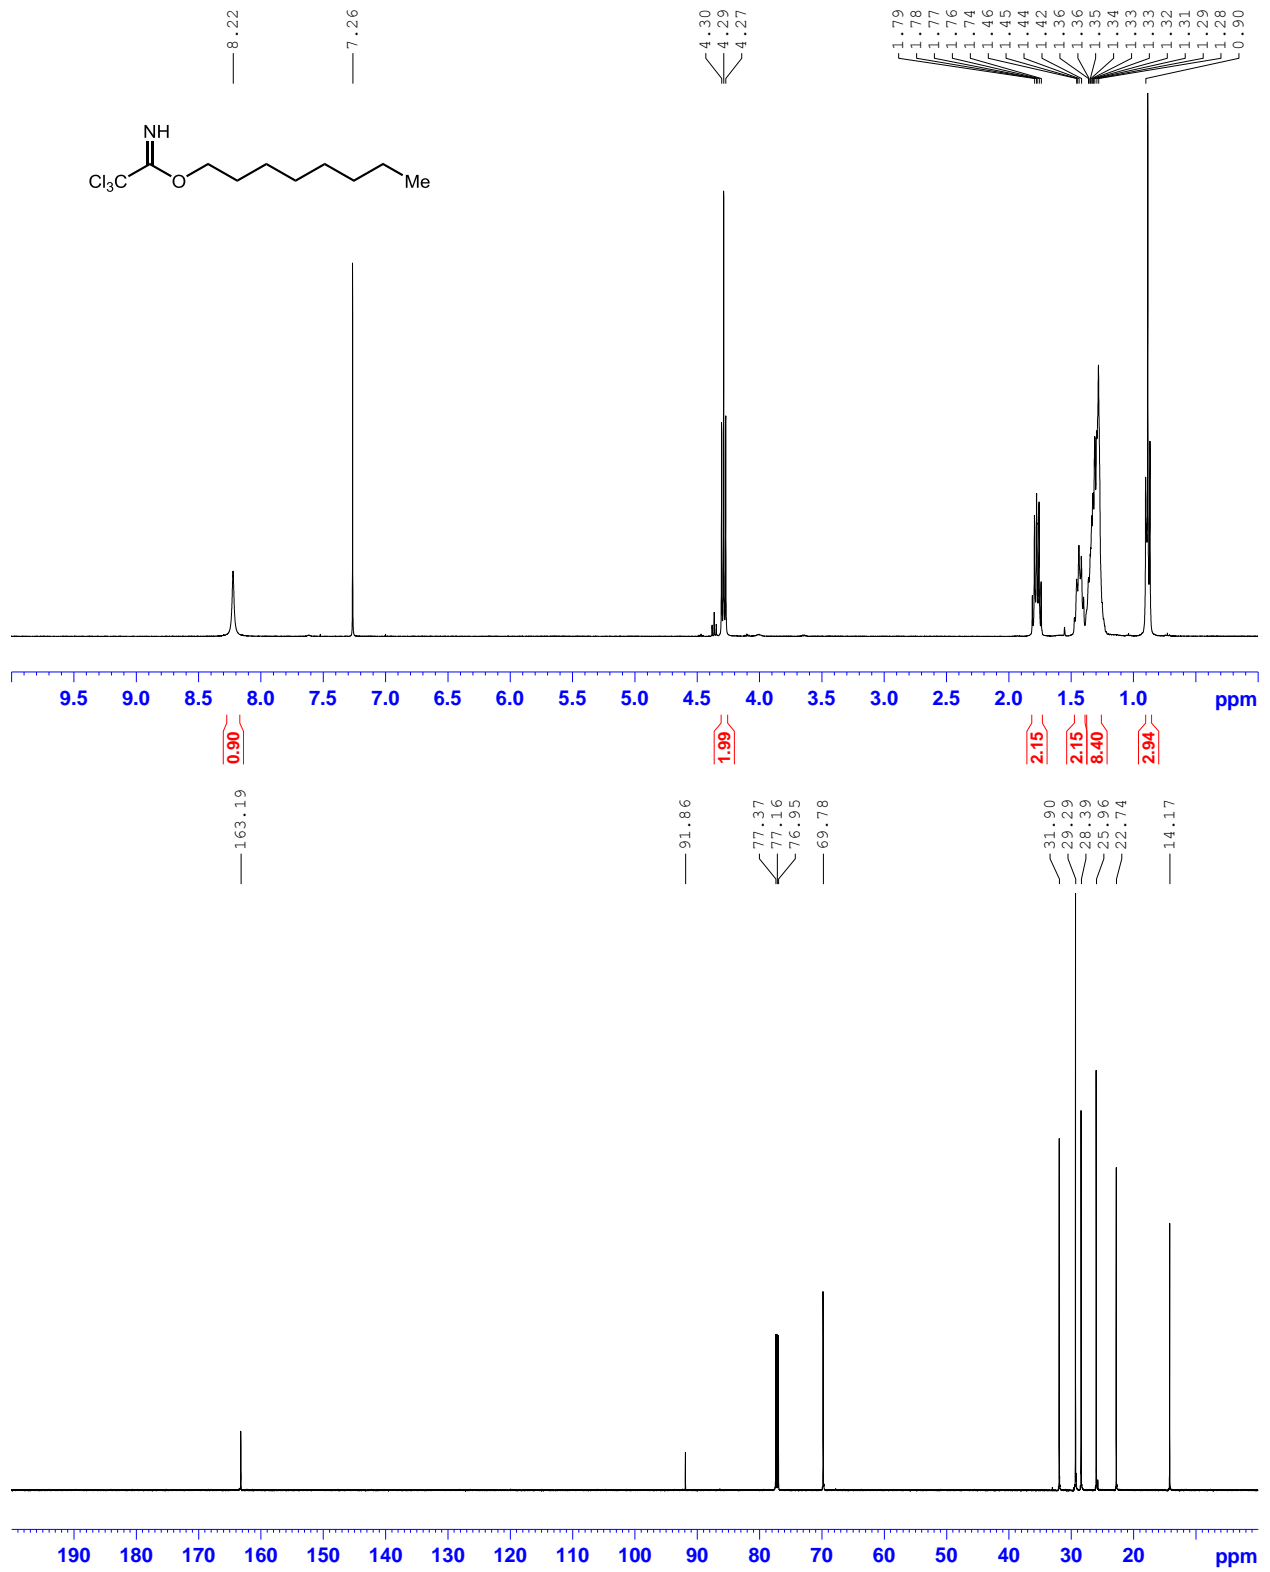

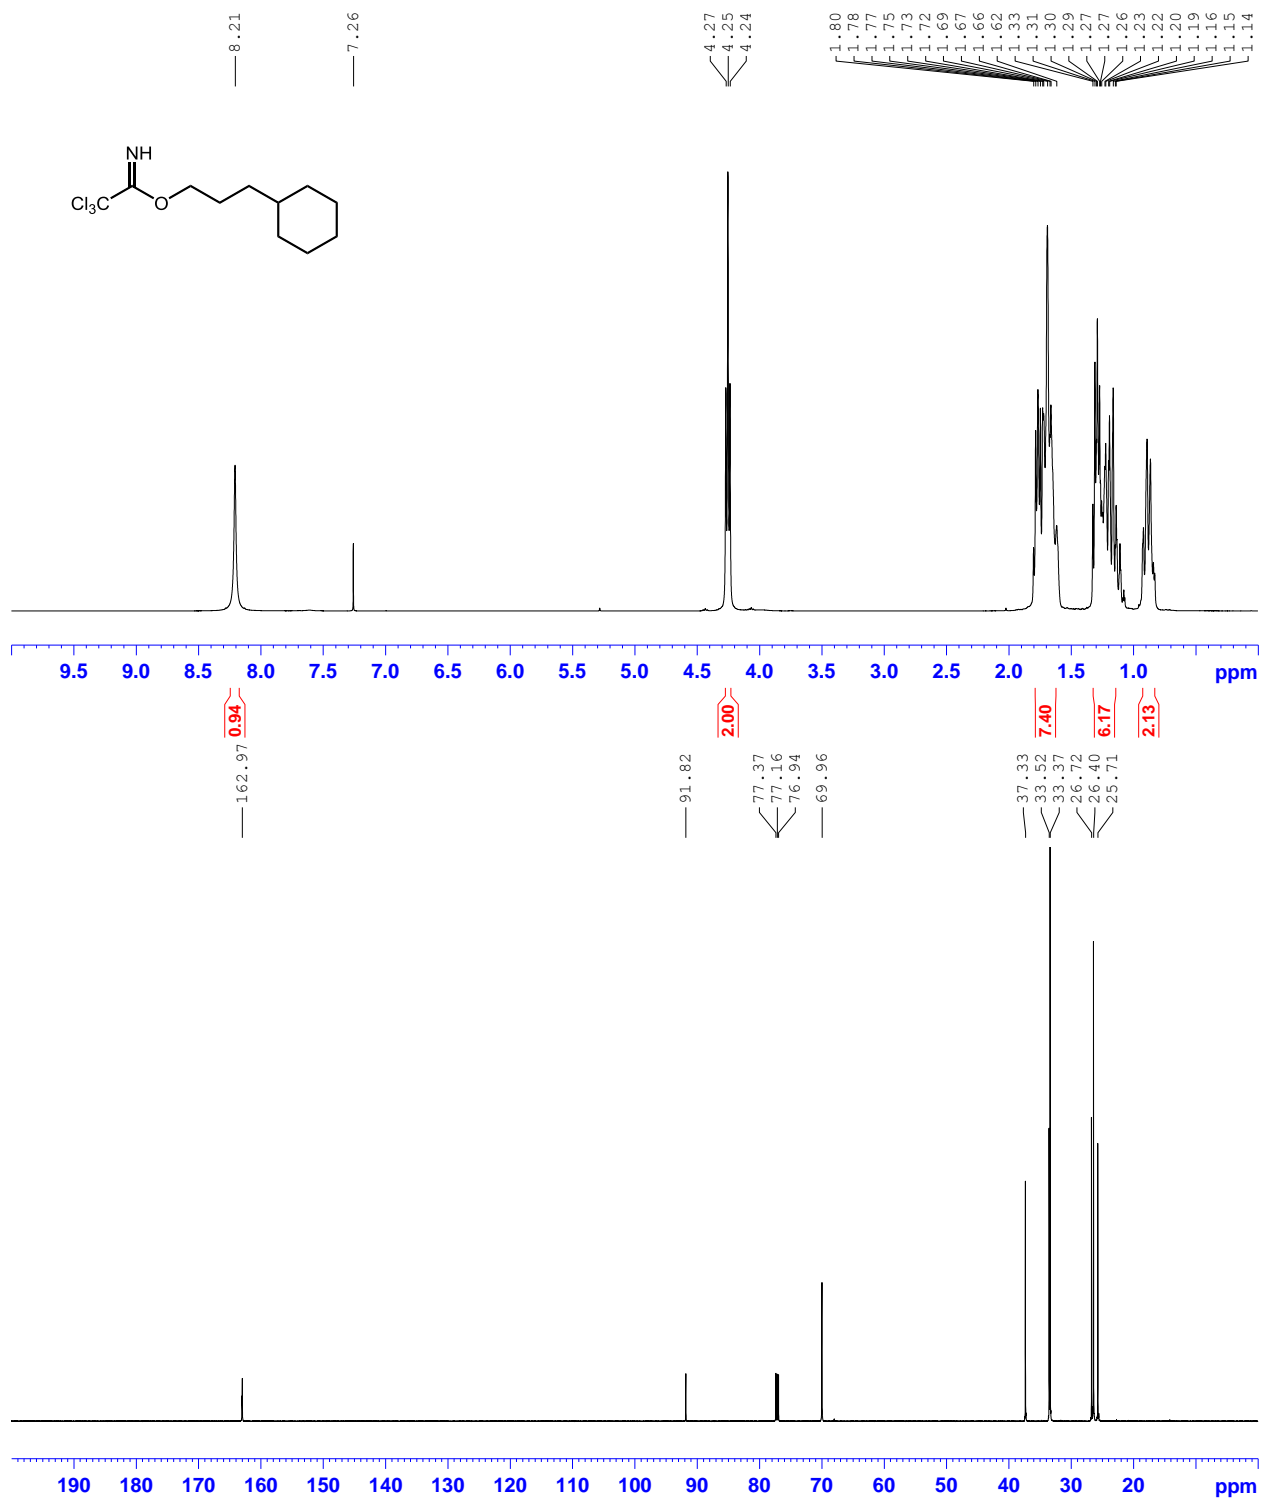

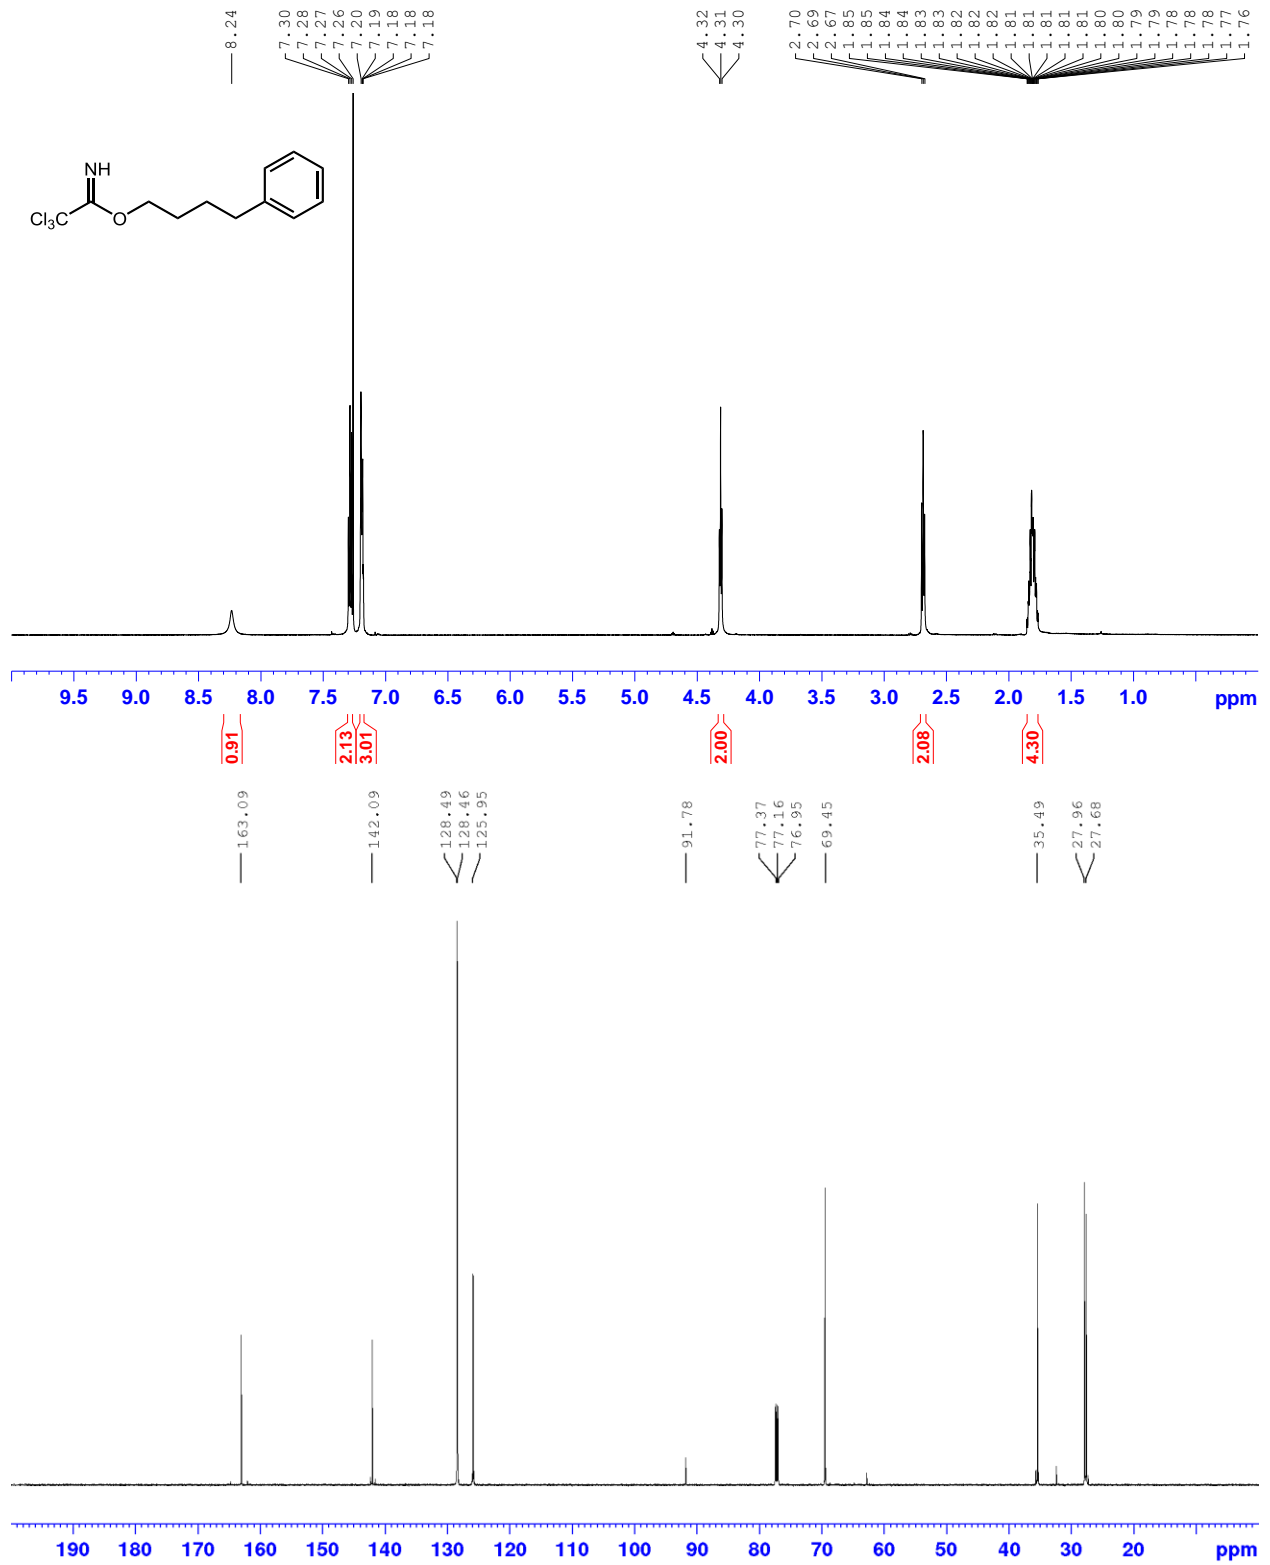

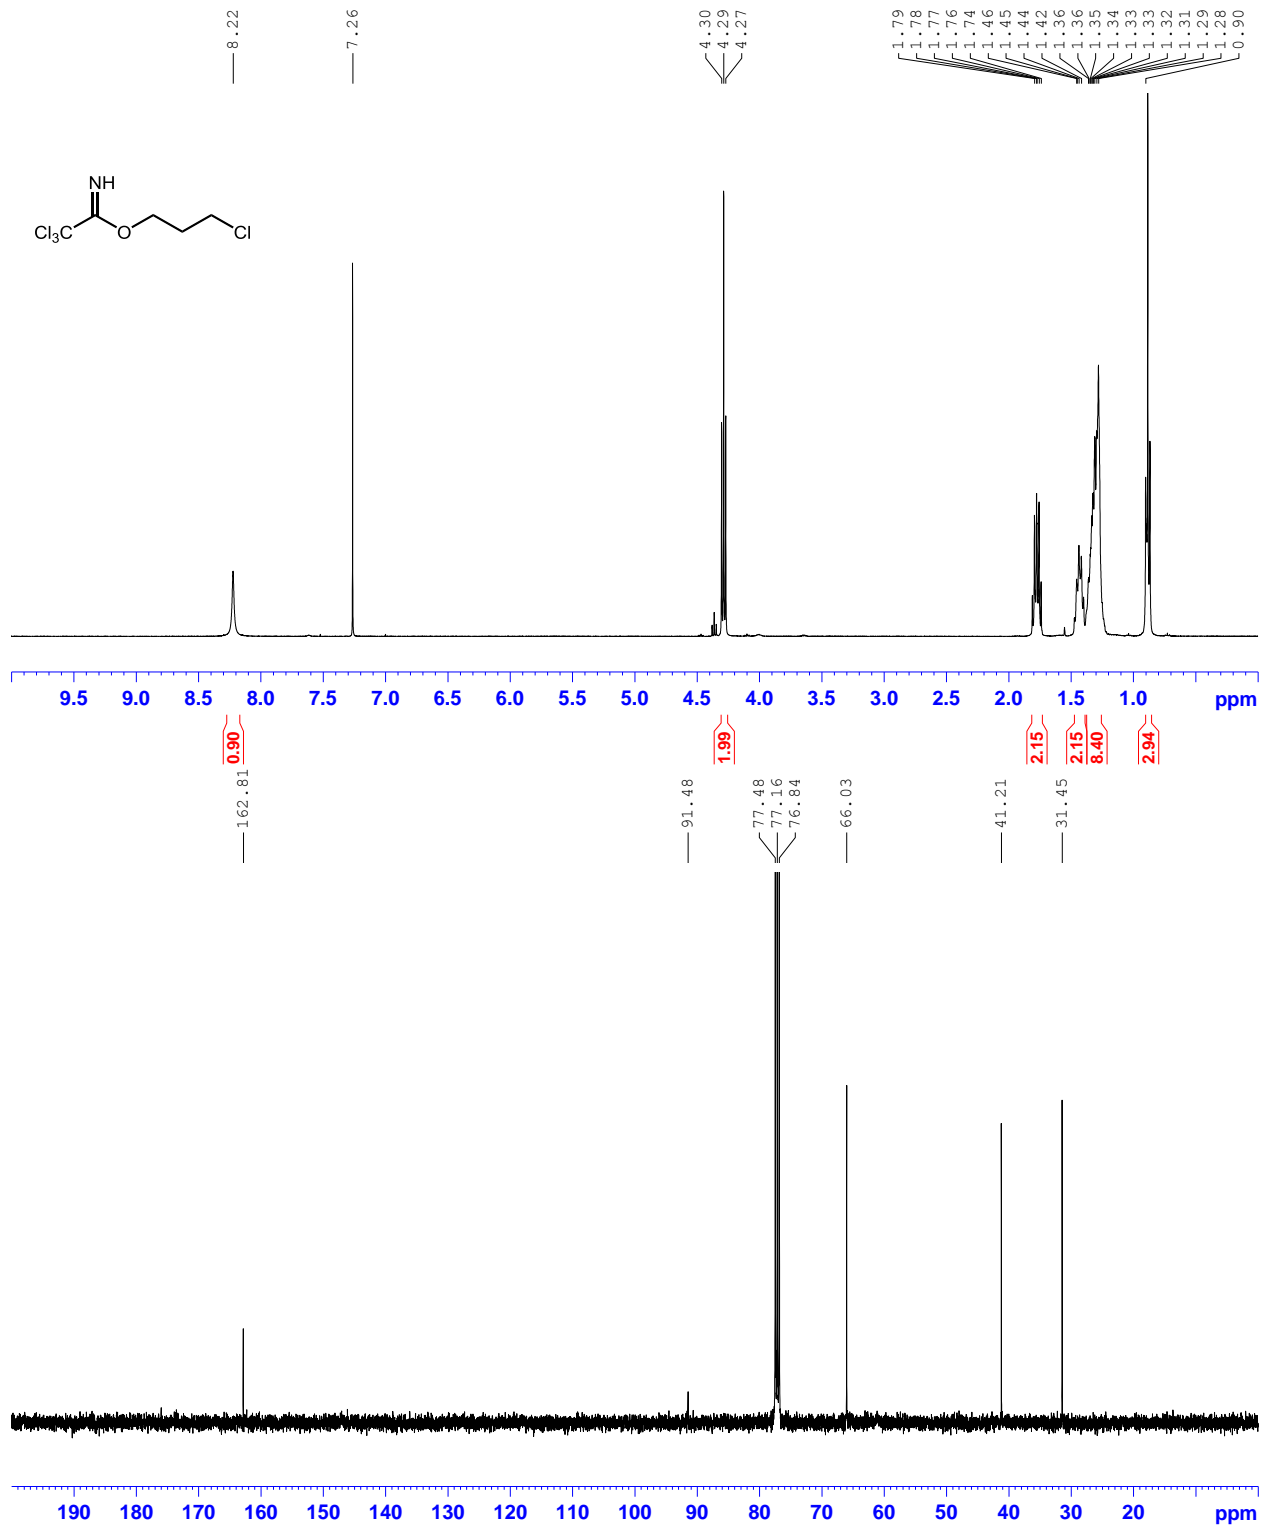

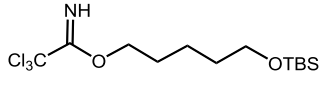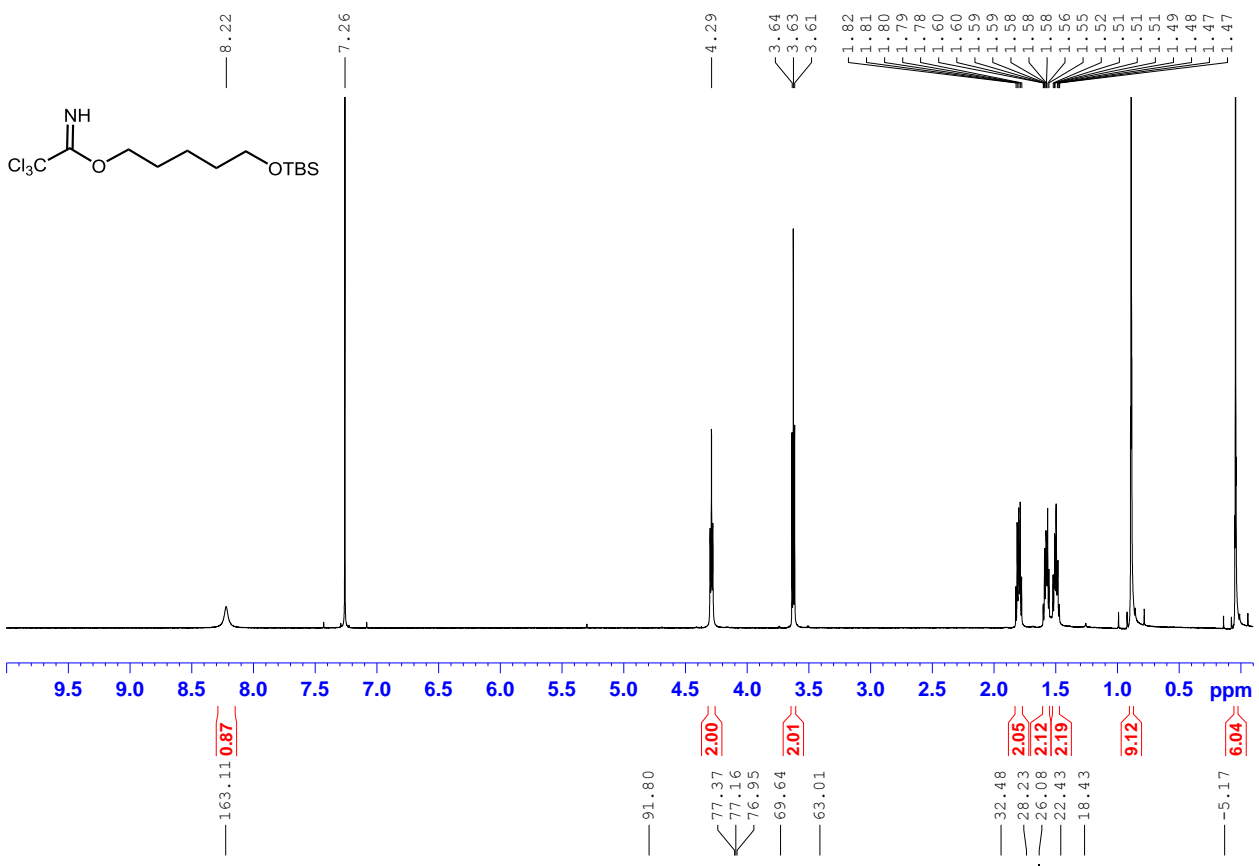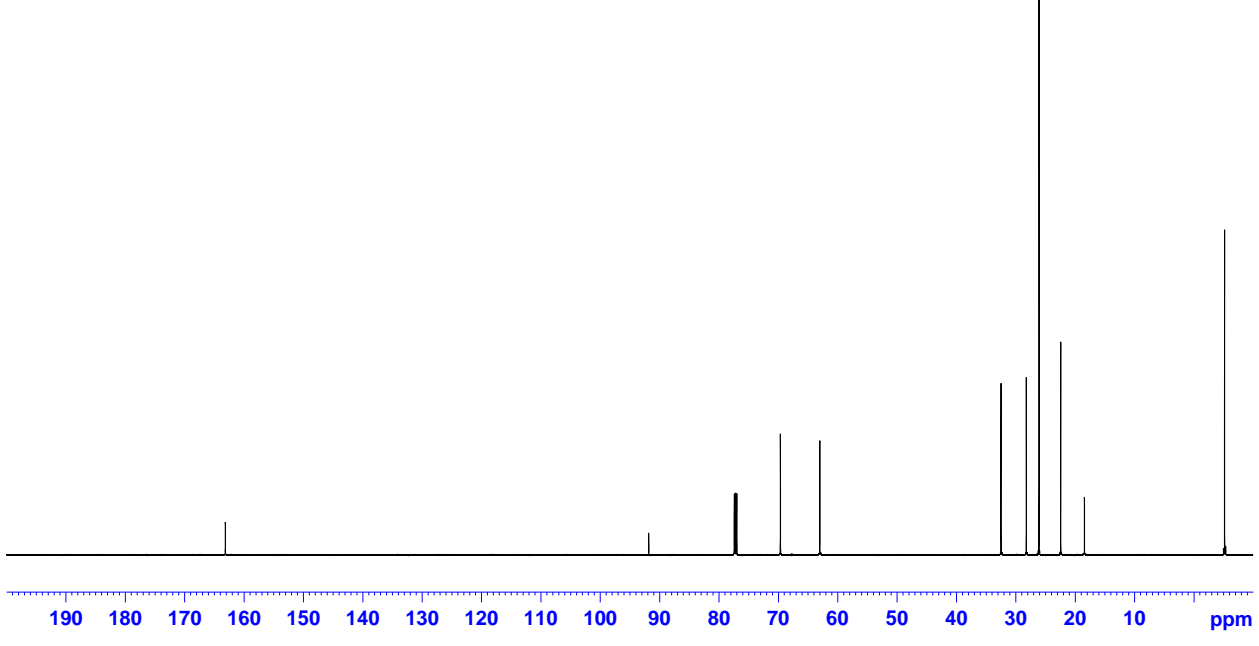

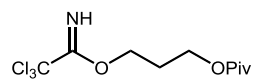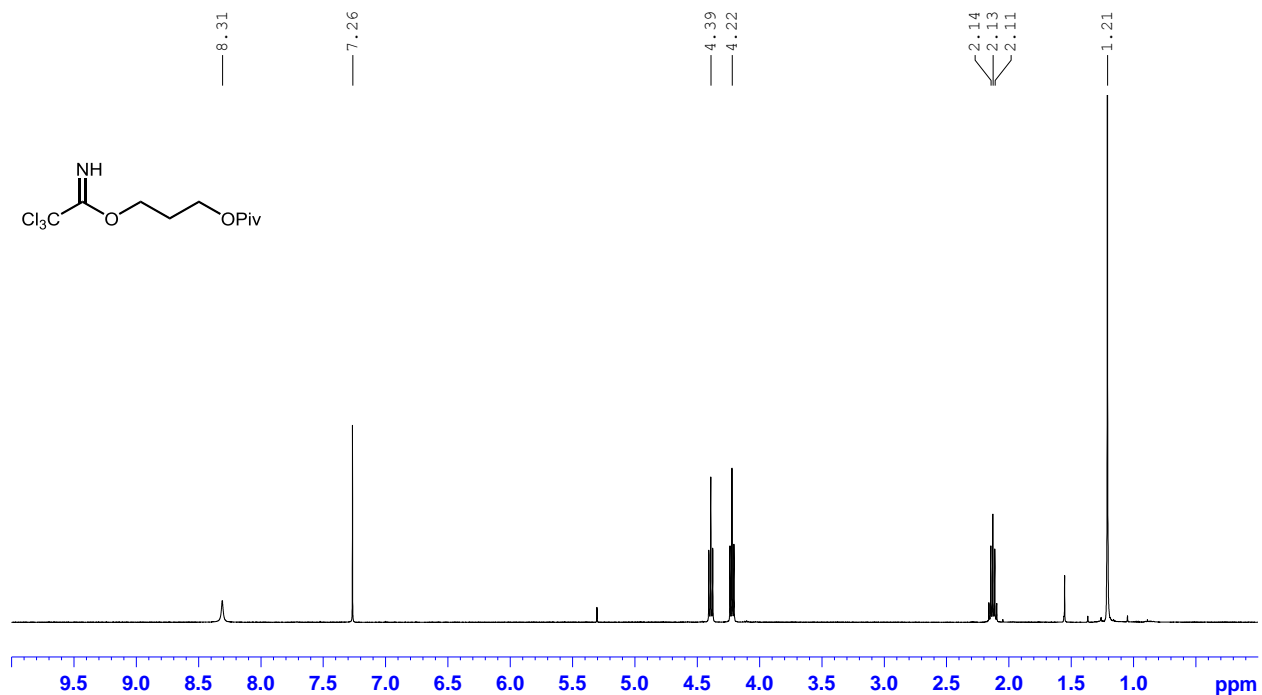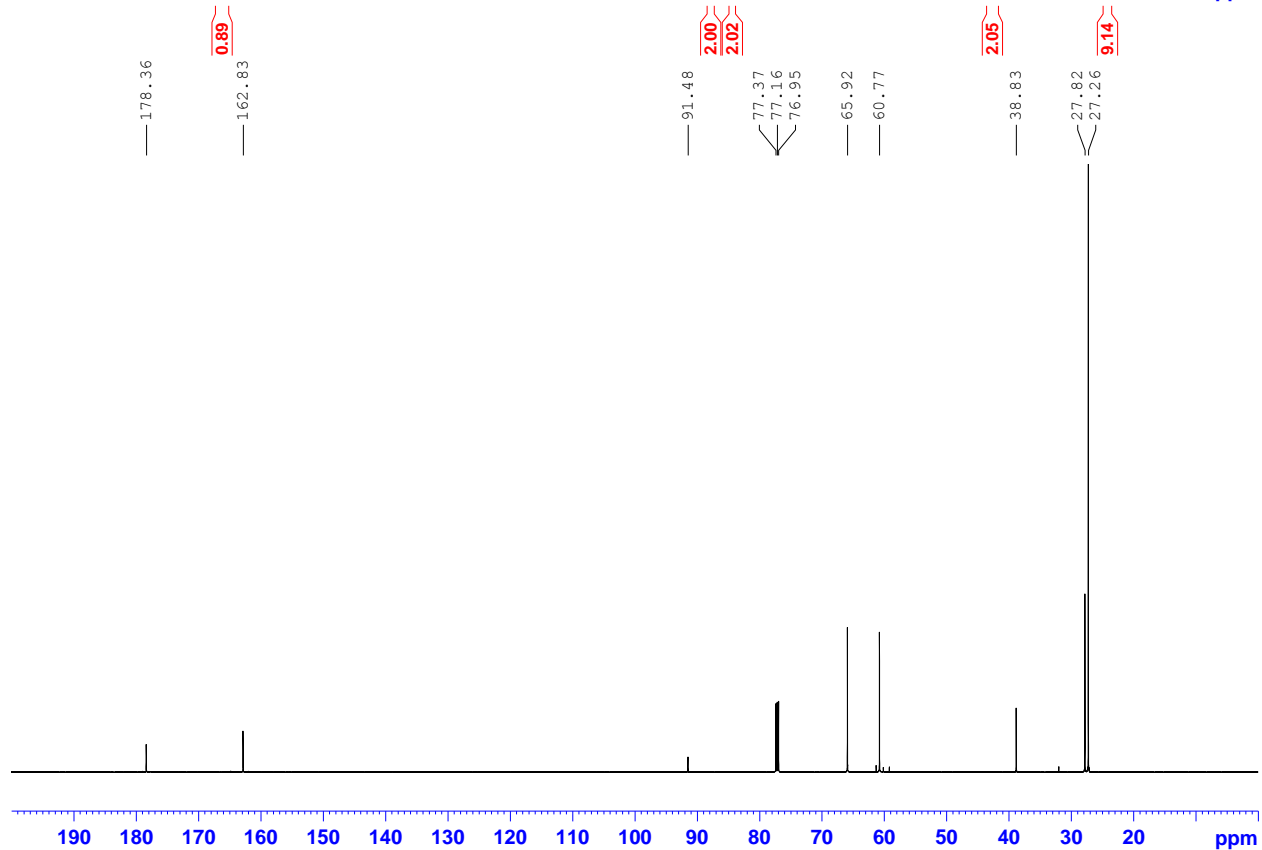



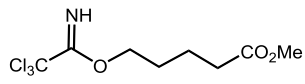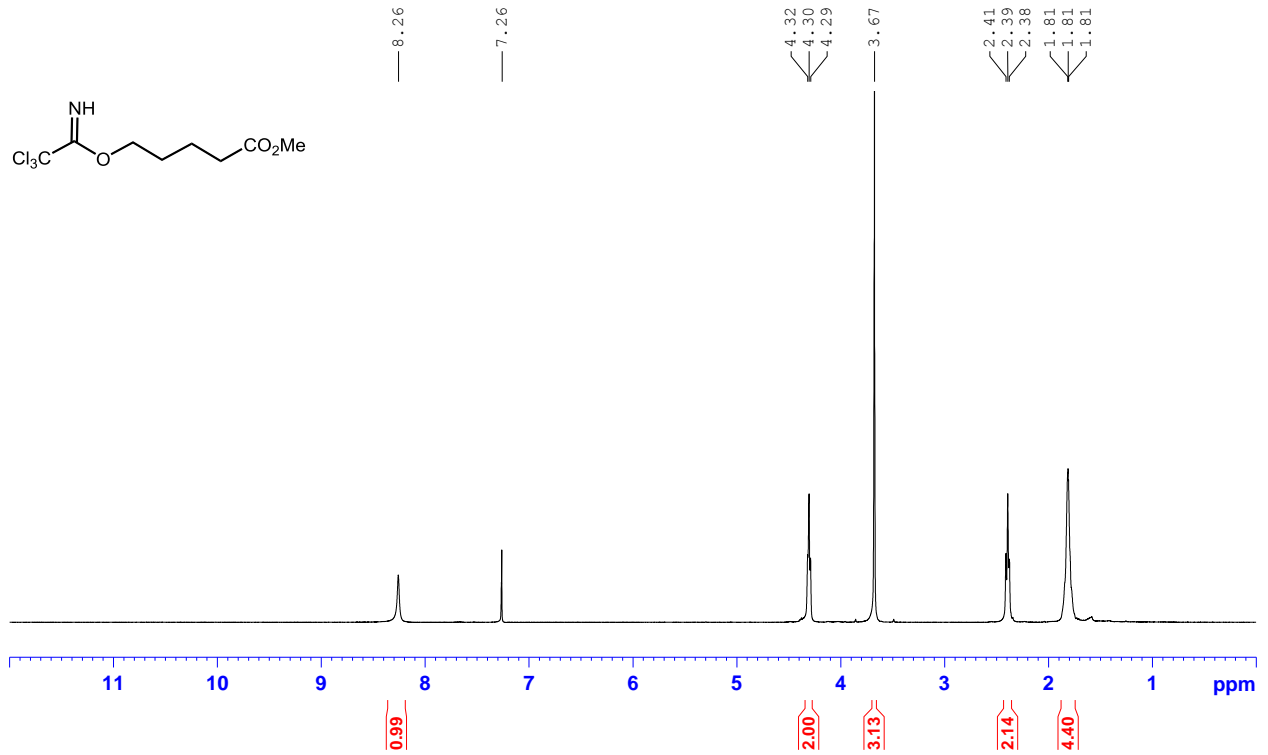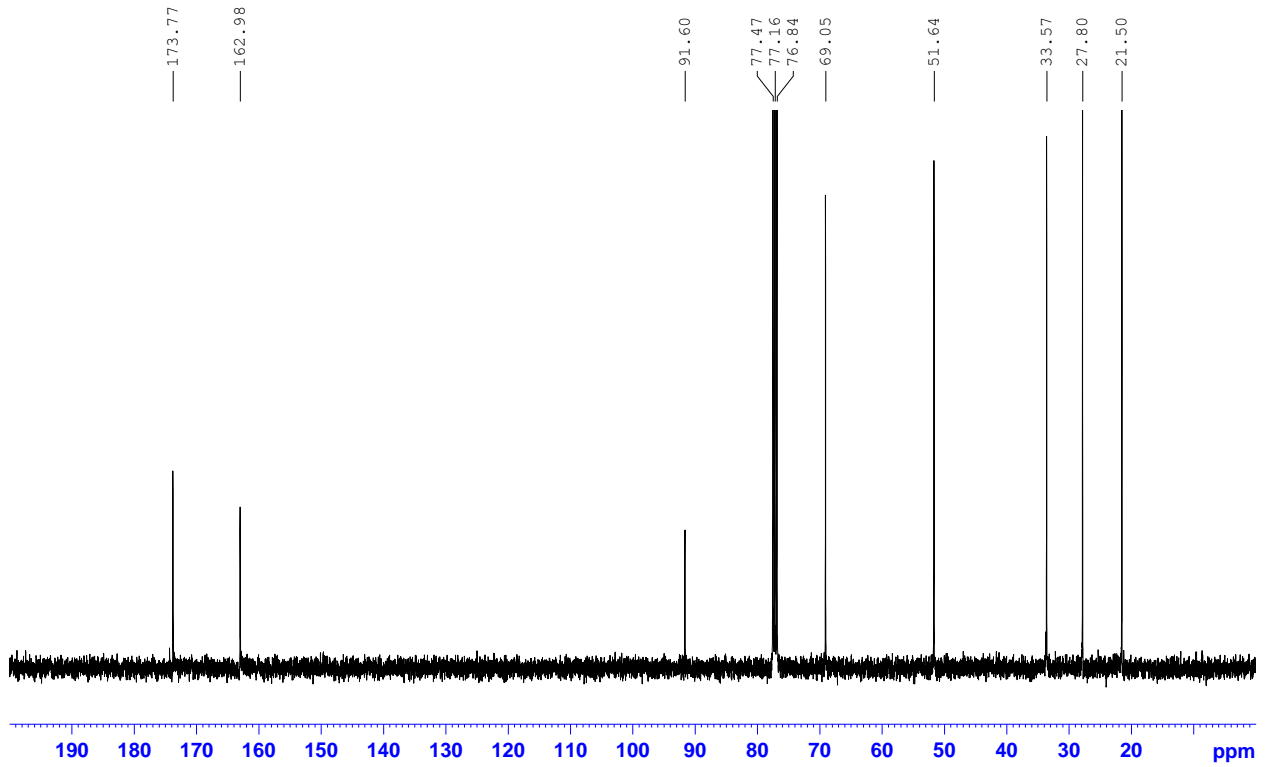

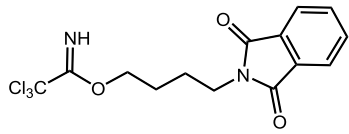

8.25  
7.85  
7.84  
7.84  
7.83  
7.72  
7.71  
7.71  
7.70  
7.26

4.32  
3.77  
3.76  
3.74

1.85  
1.85  
1.84

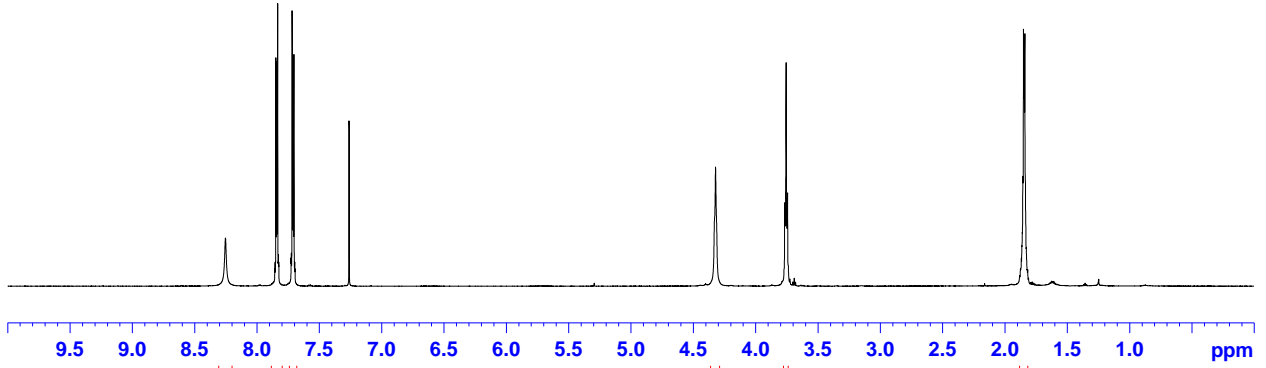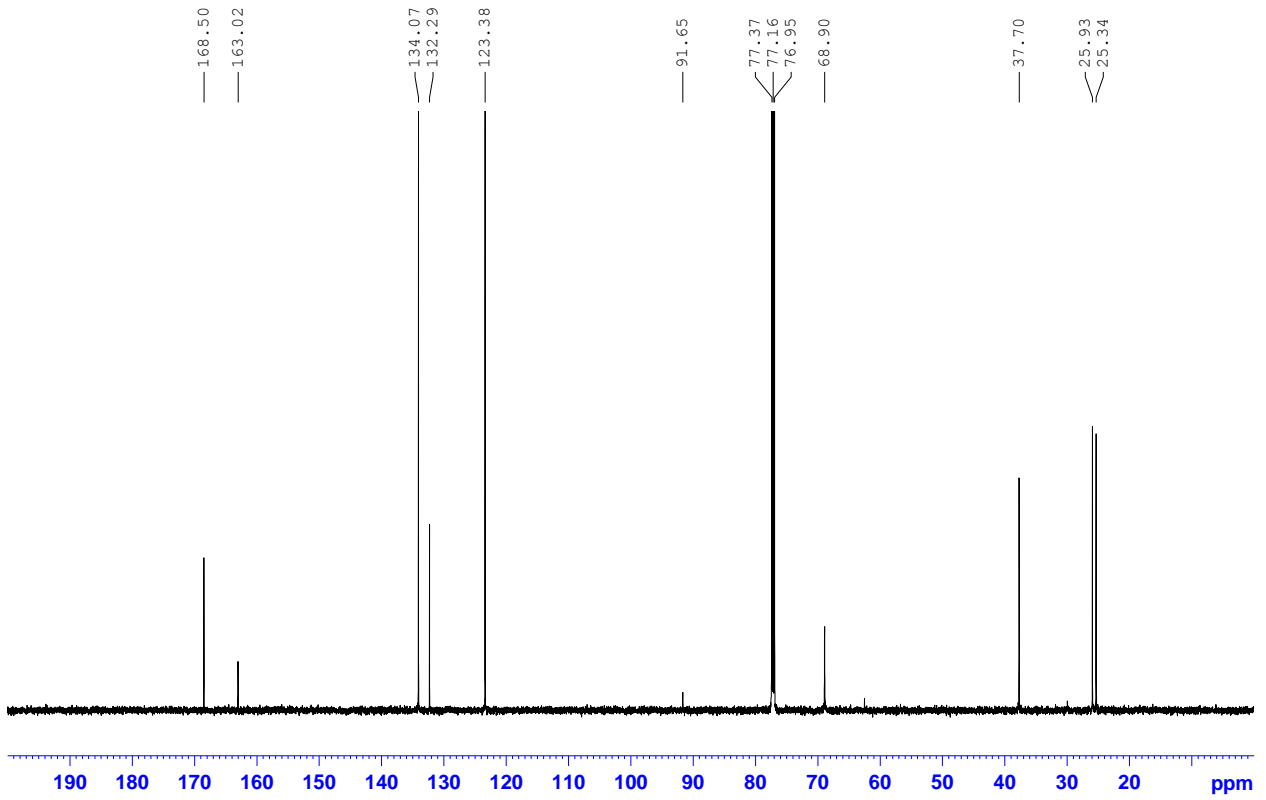

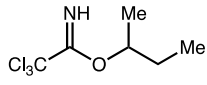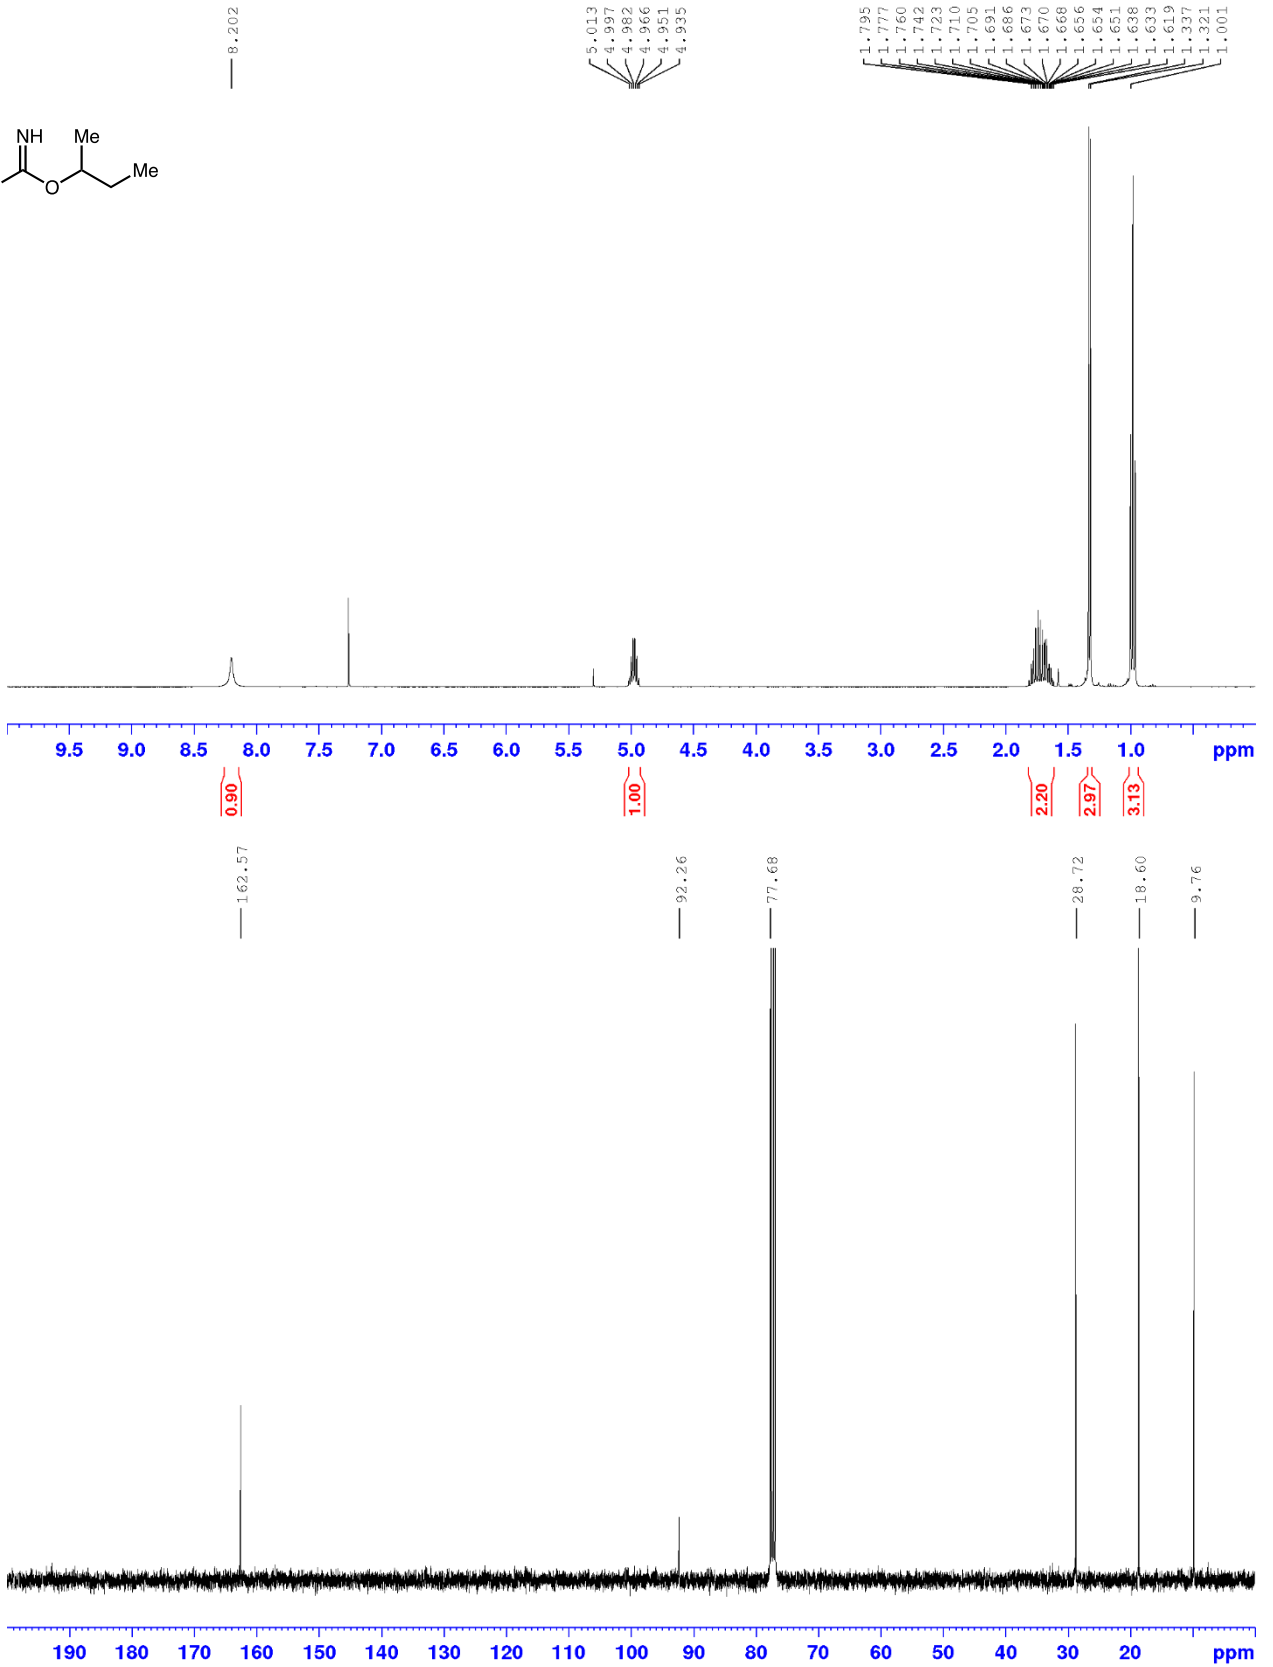

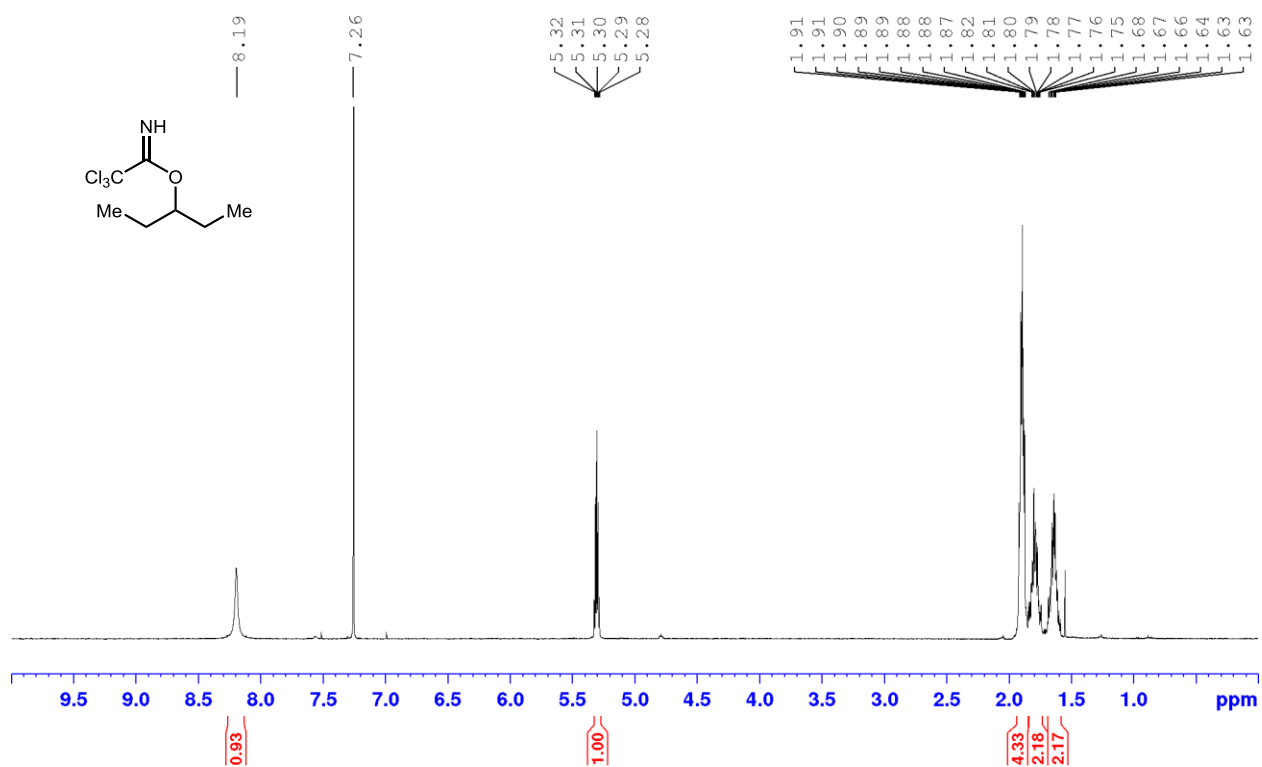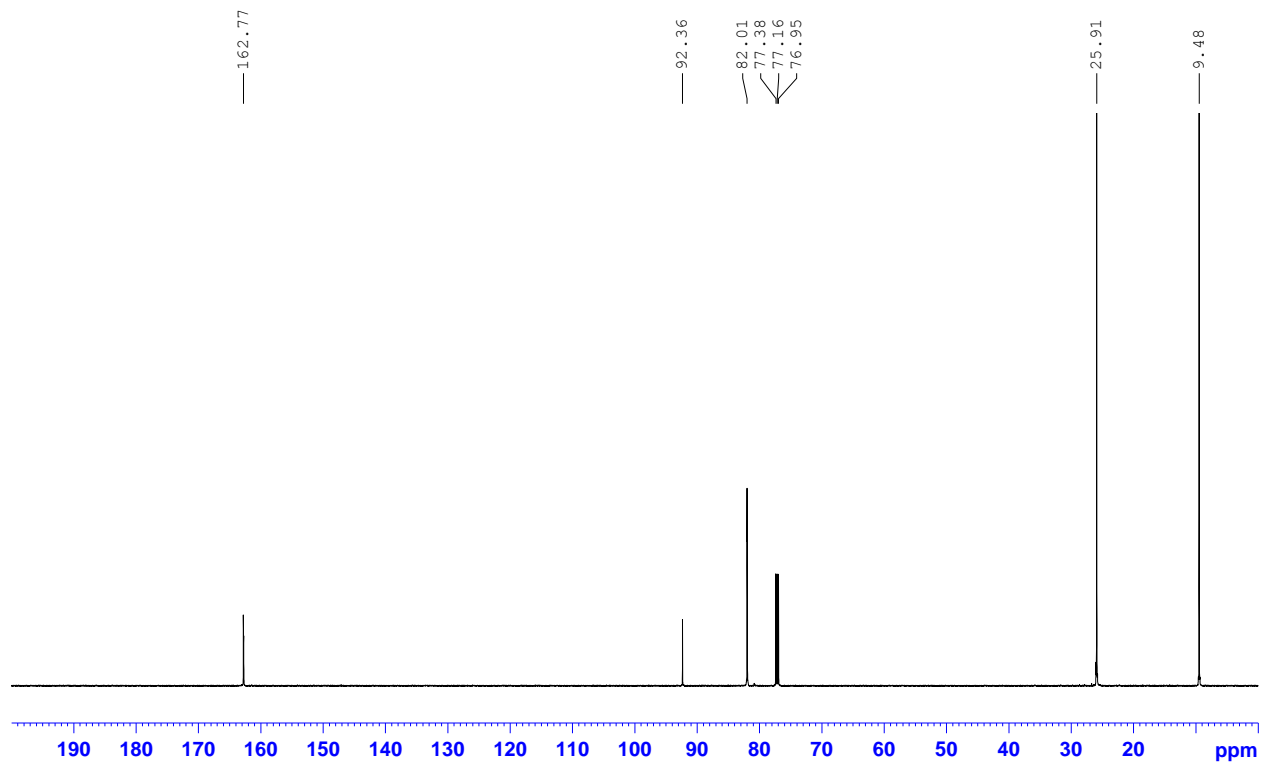

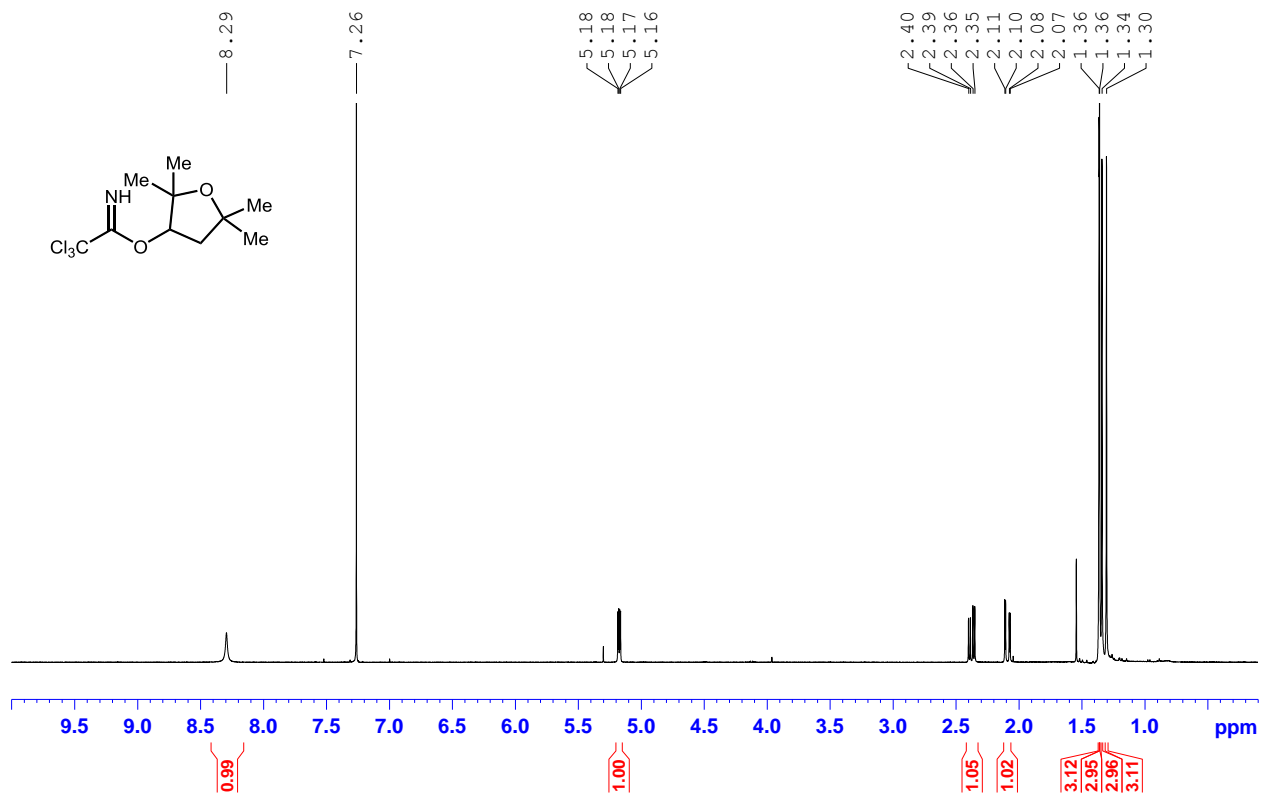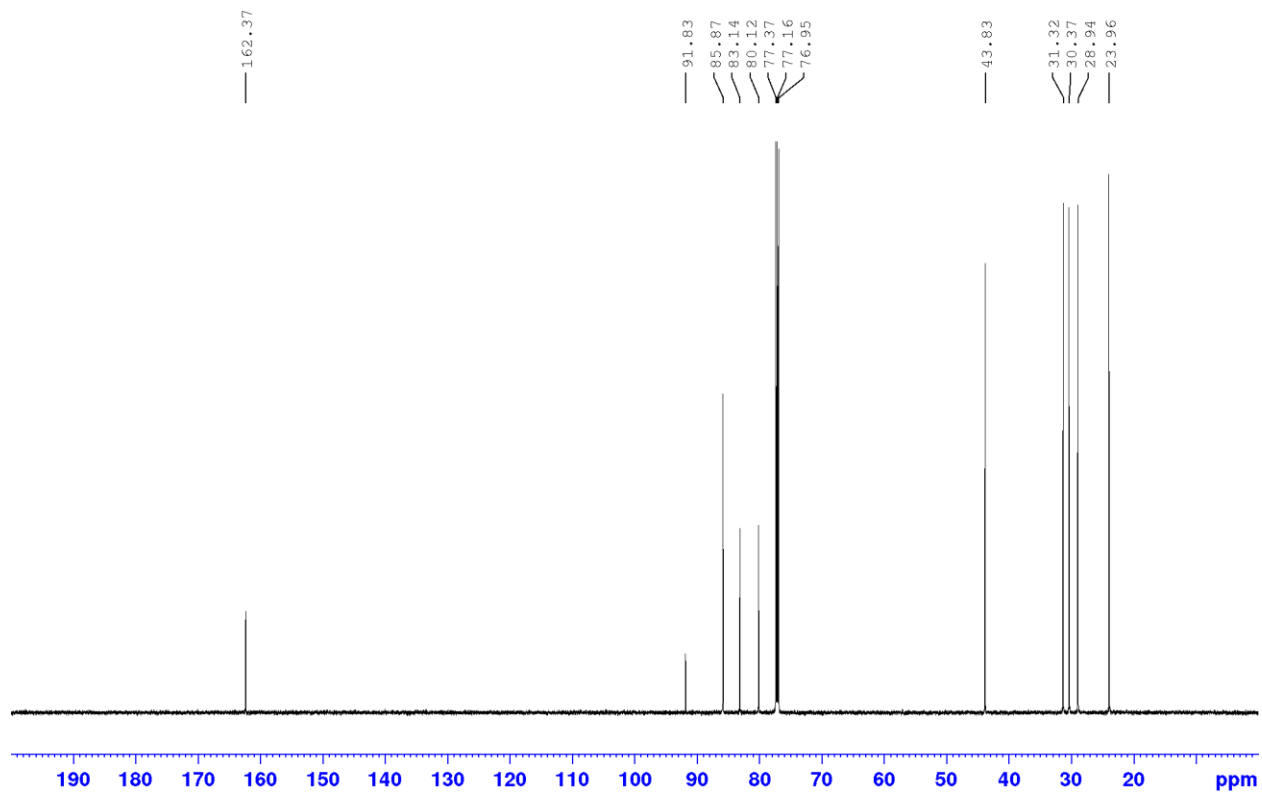

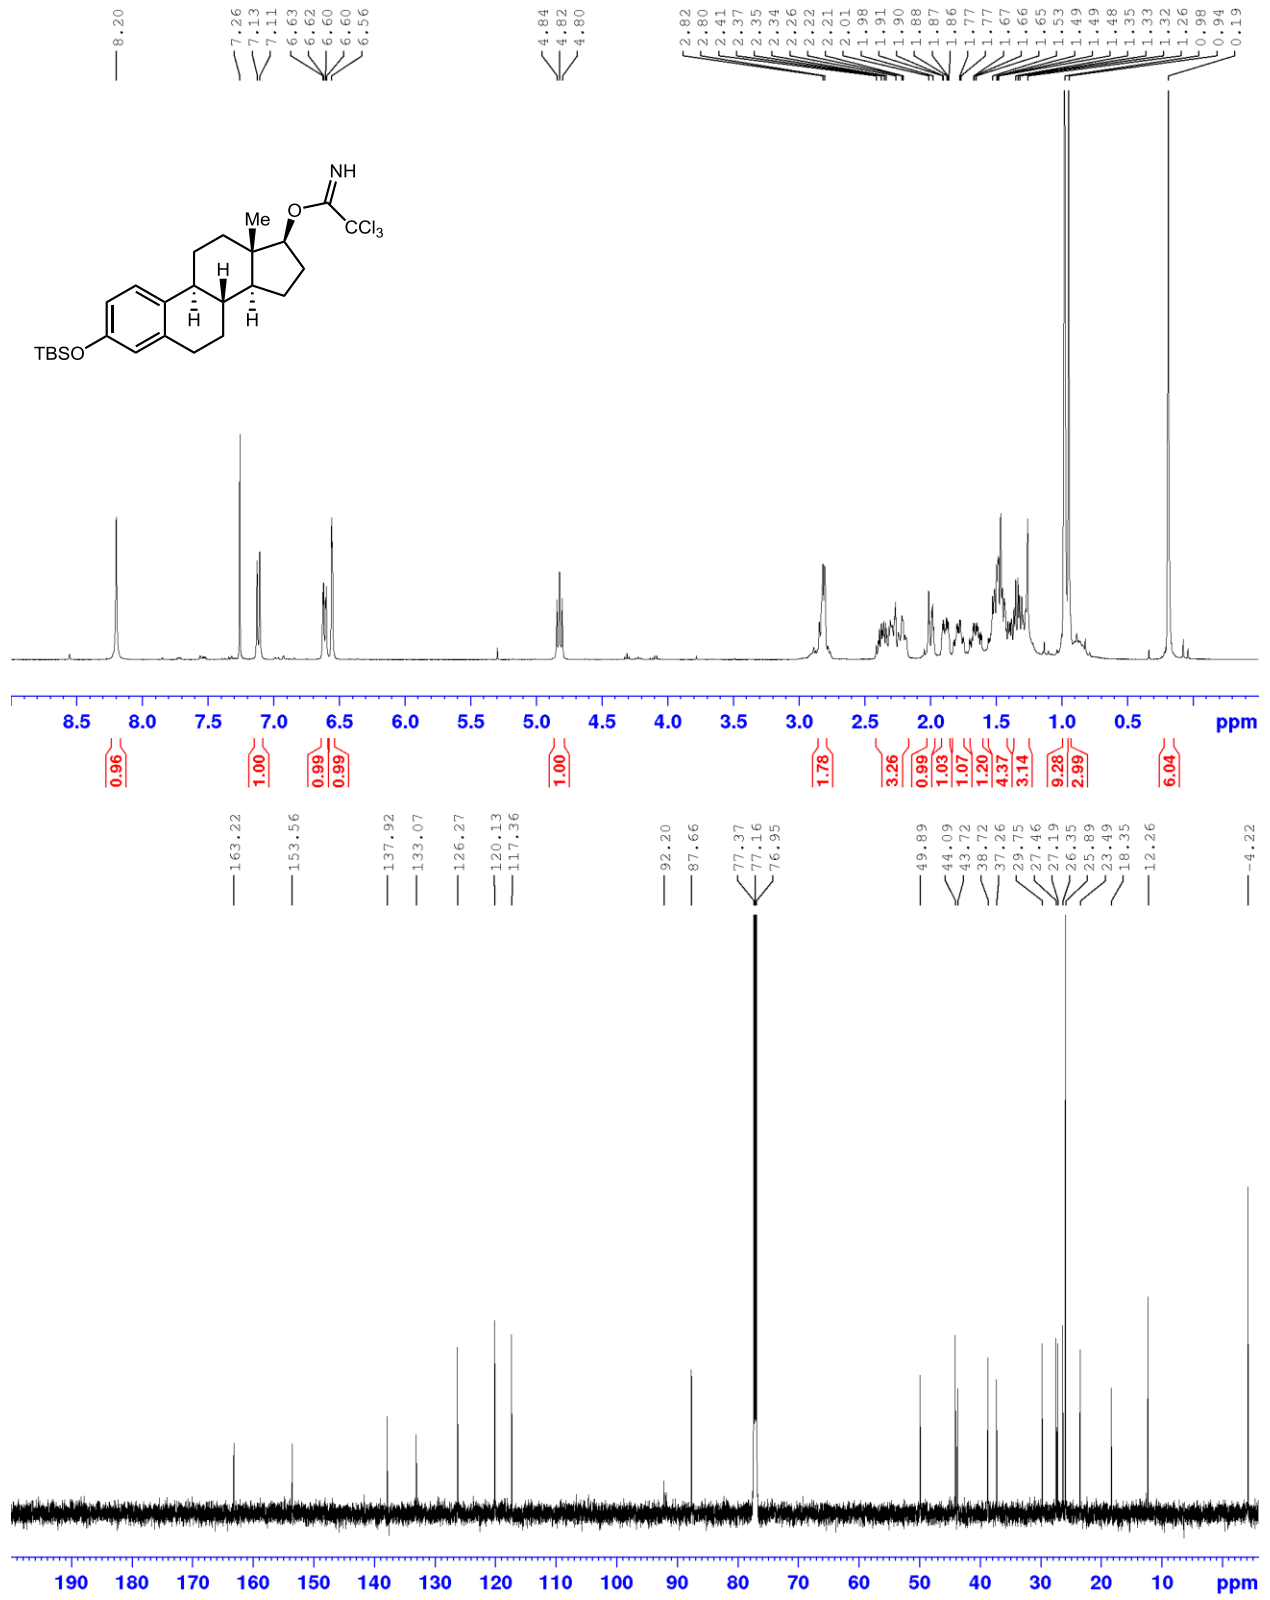

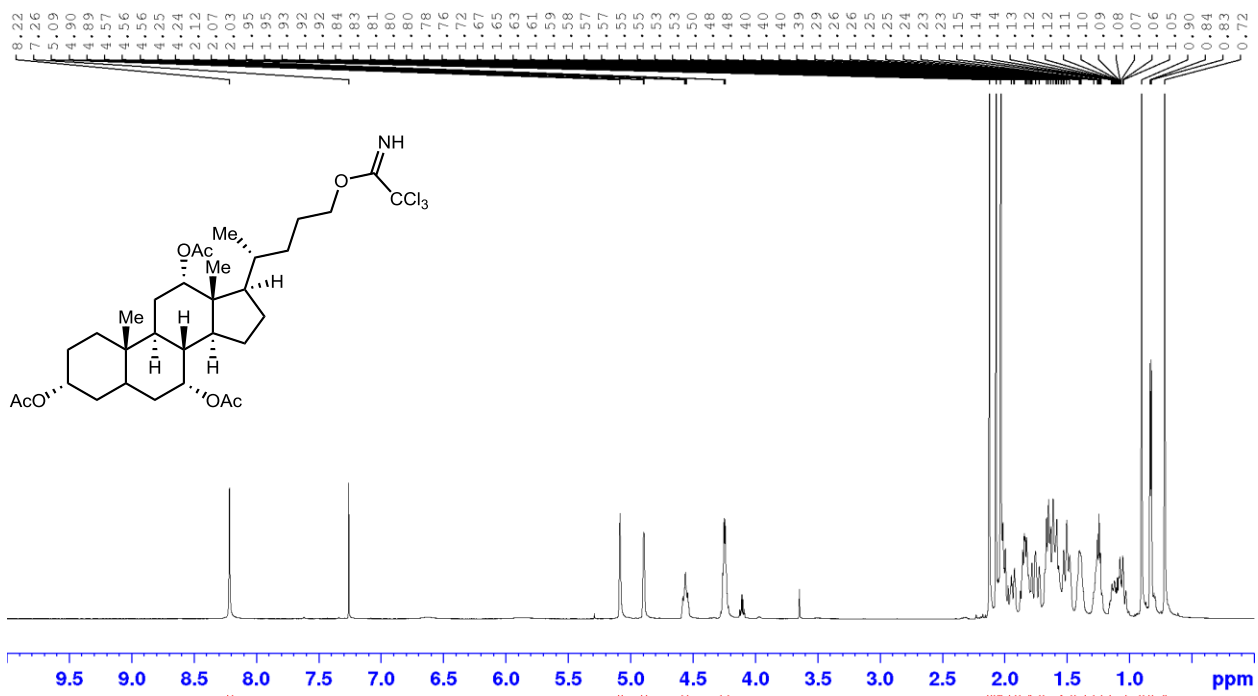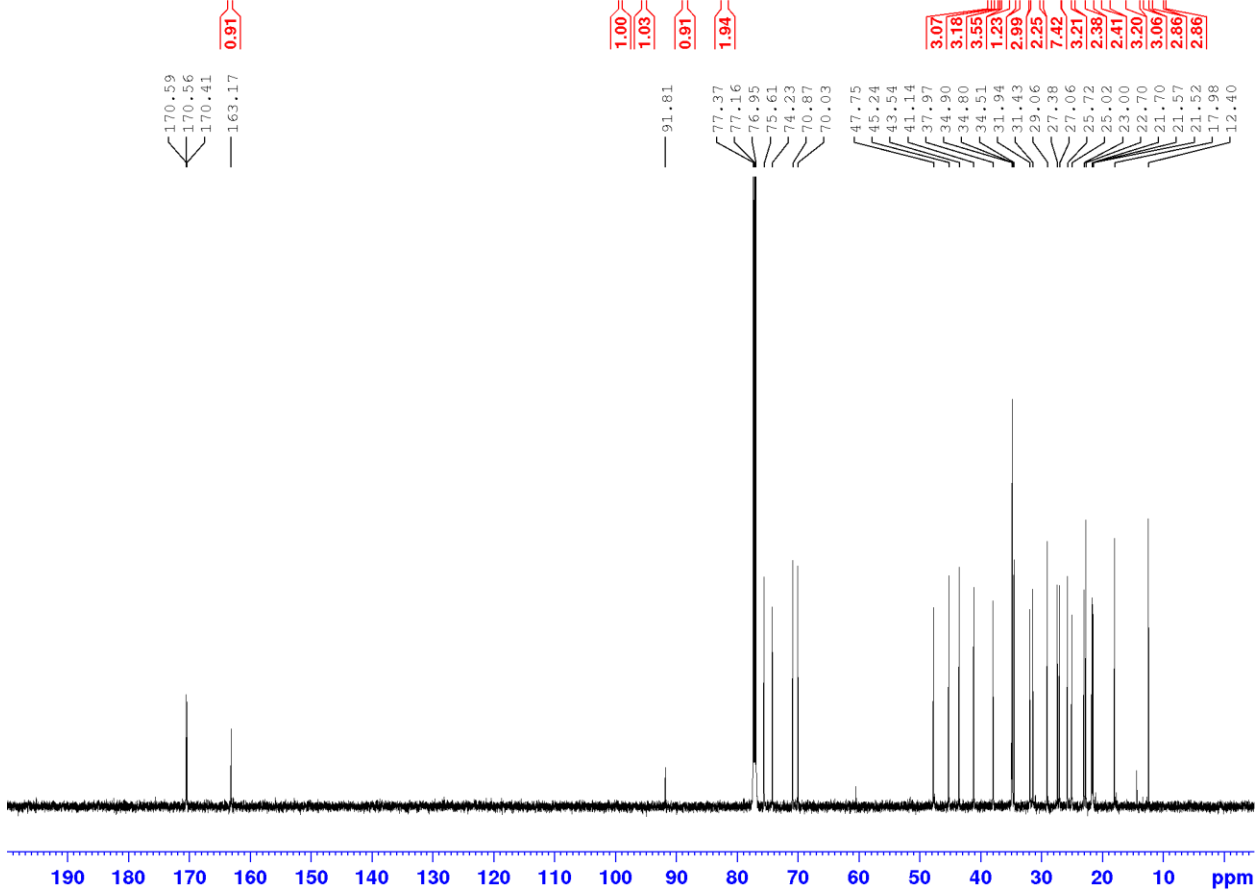

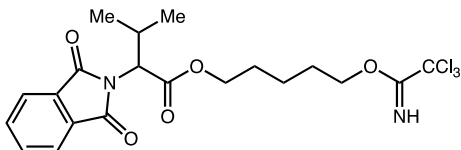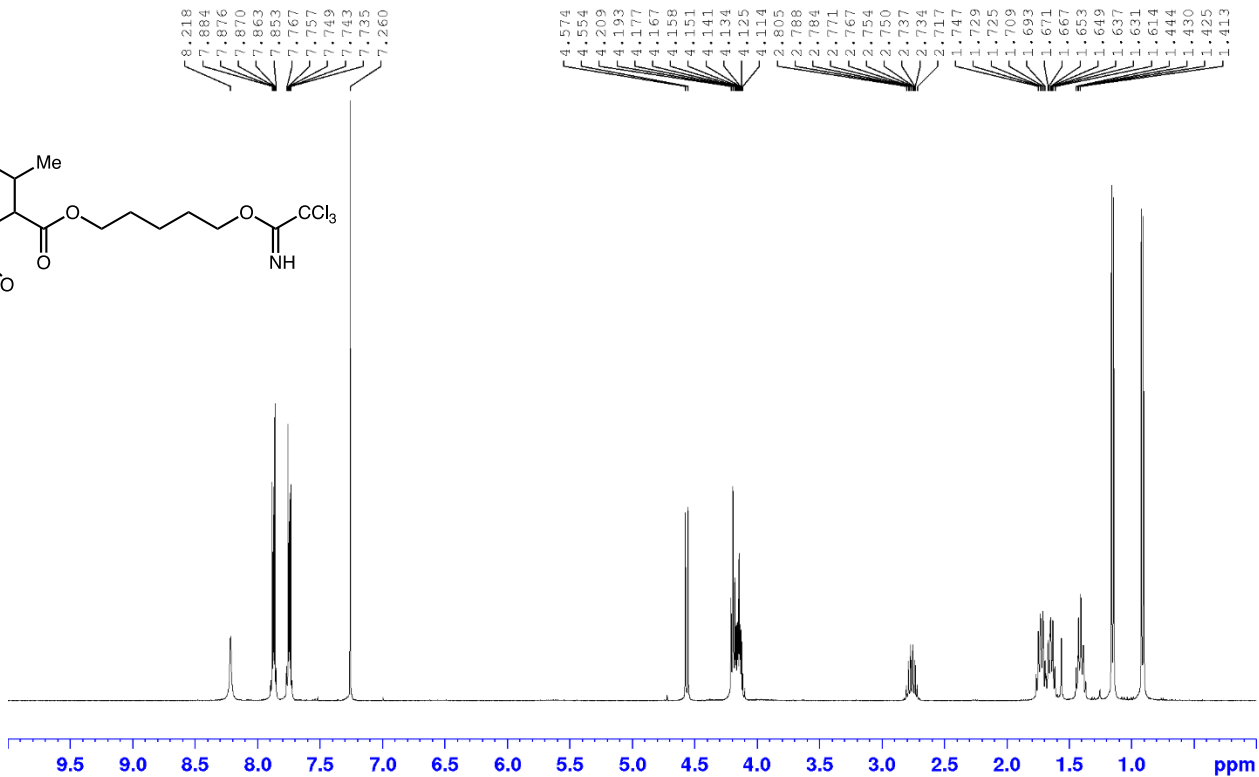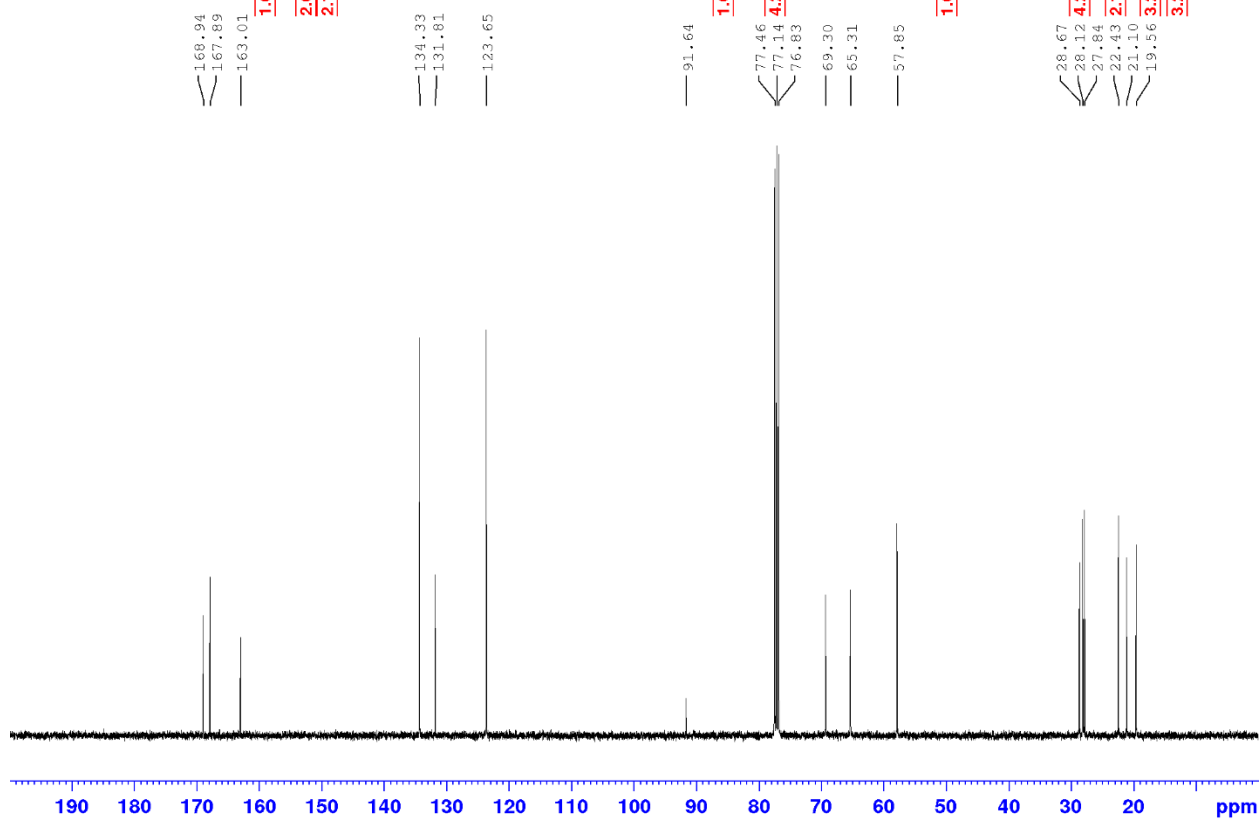



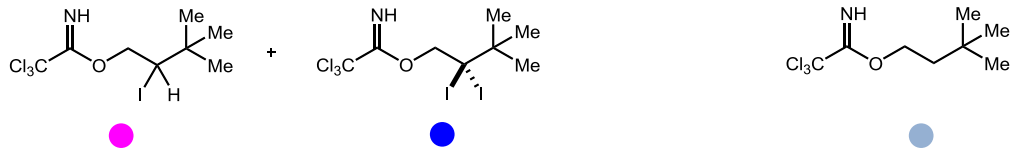

55%: 21% (3:1)

1 equiv of isopropylacetate

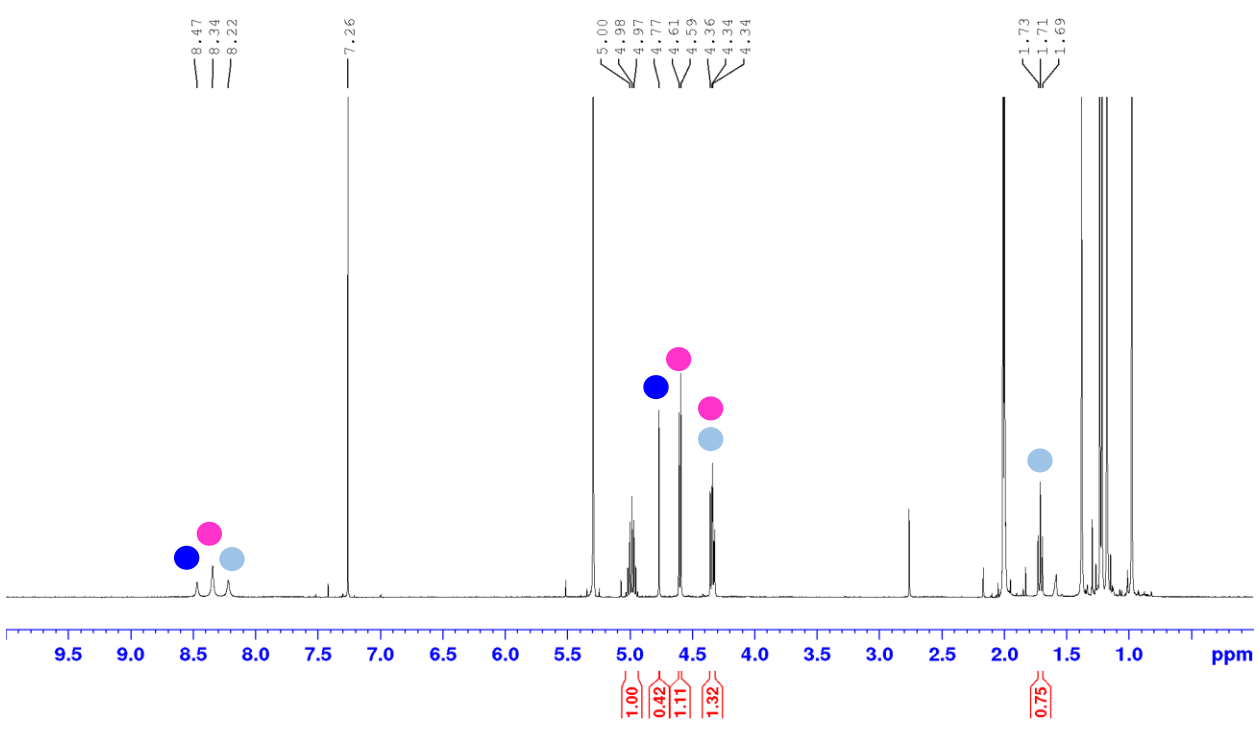

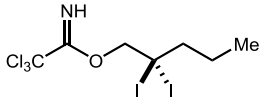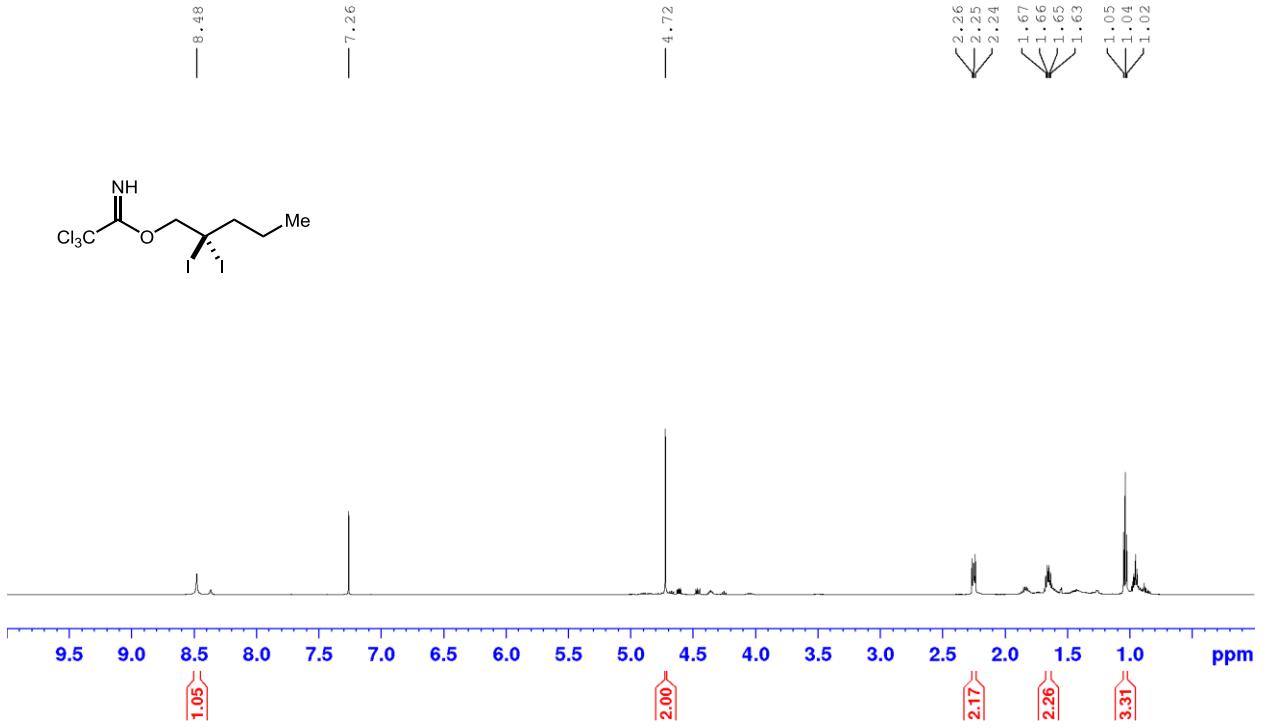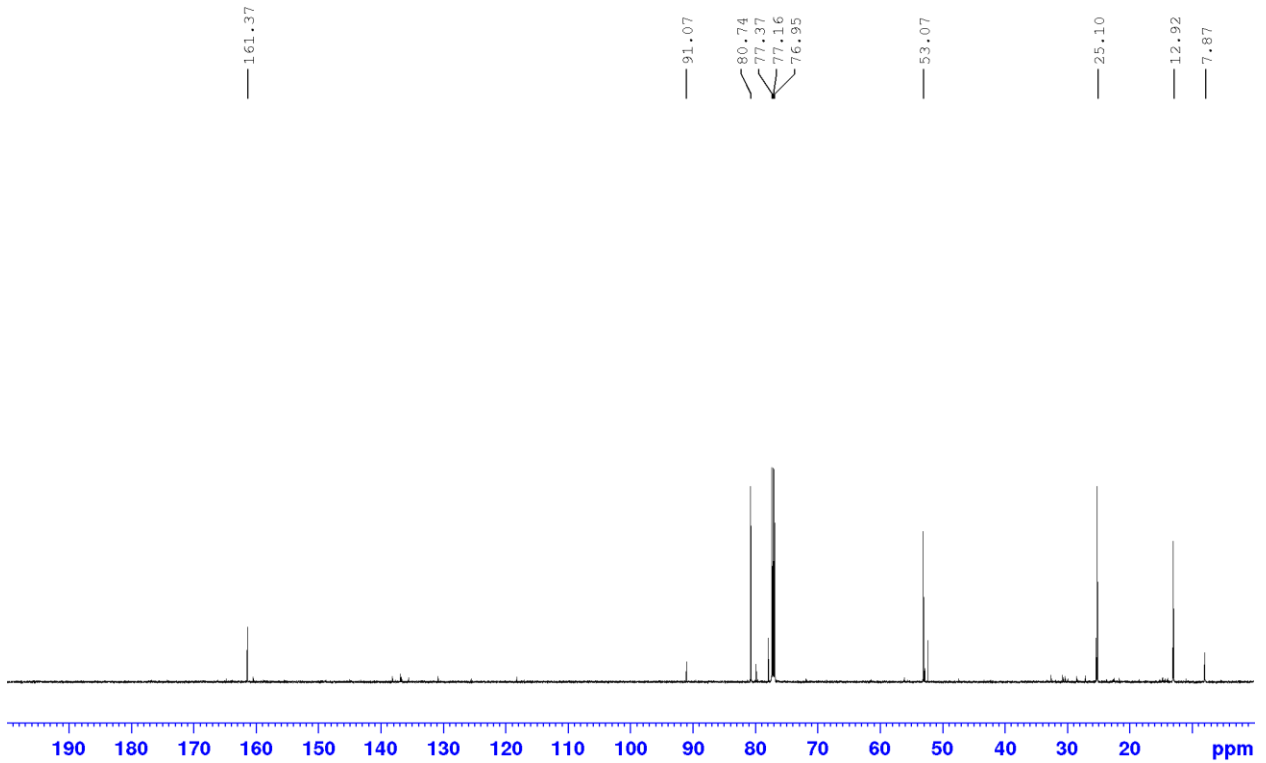

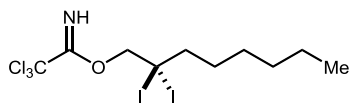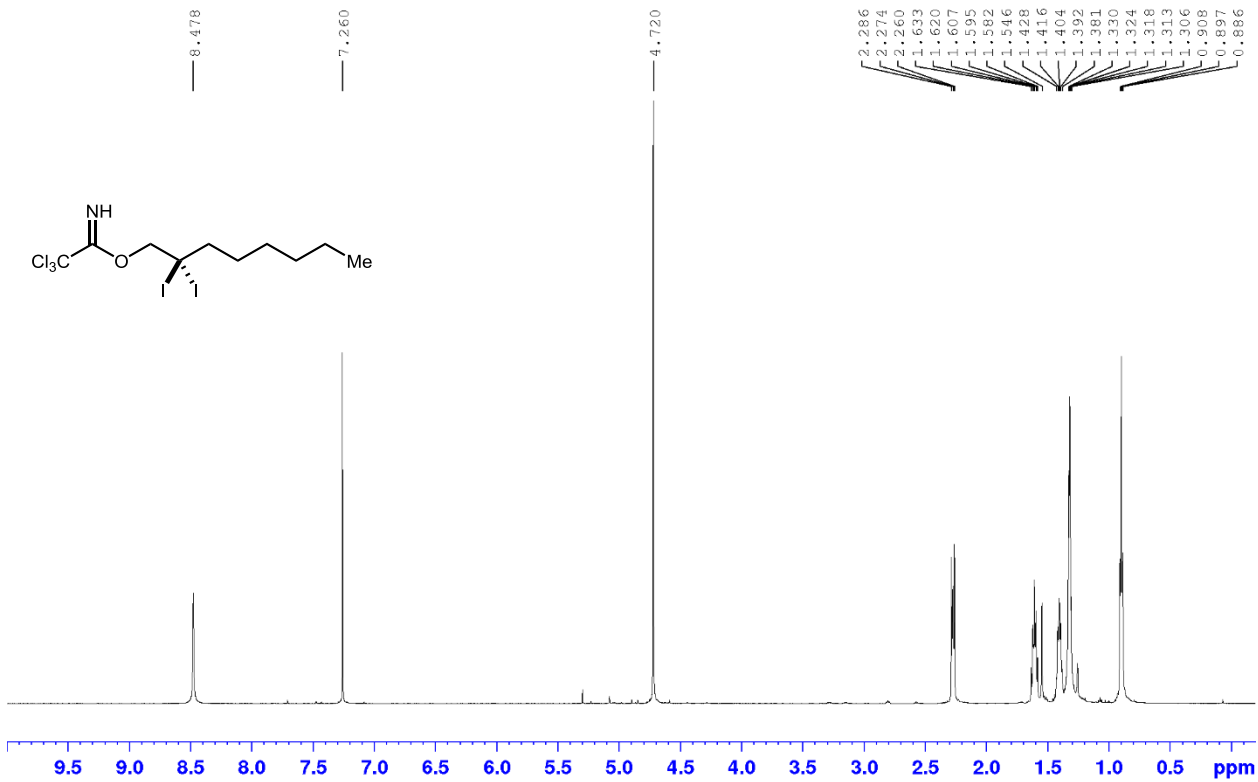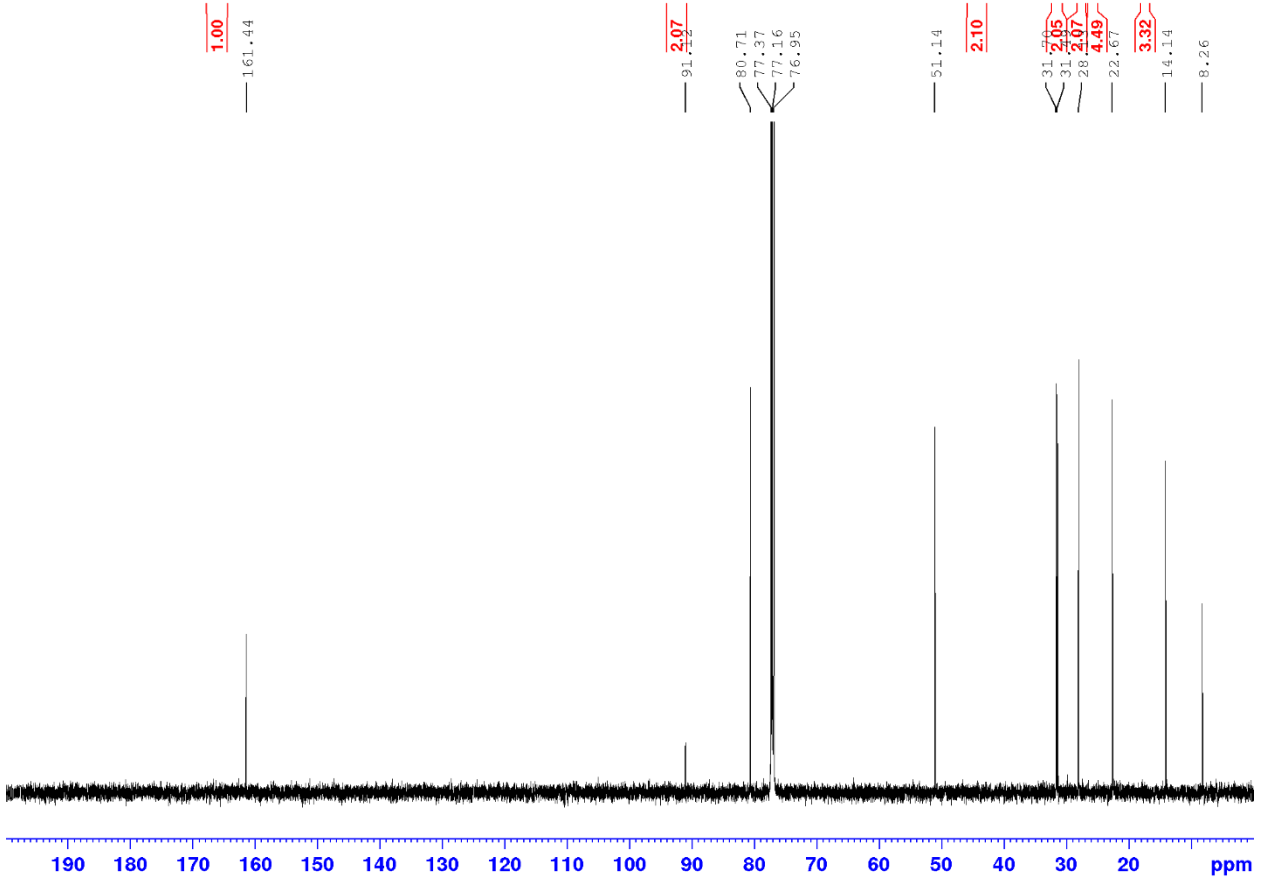

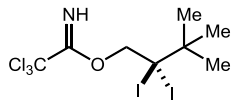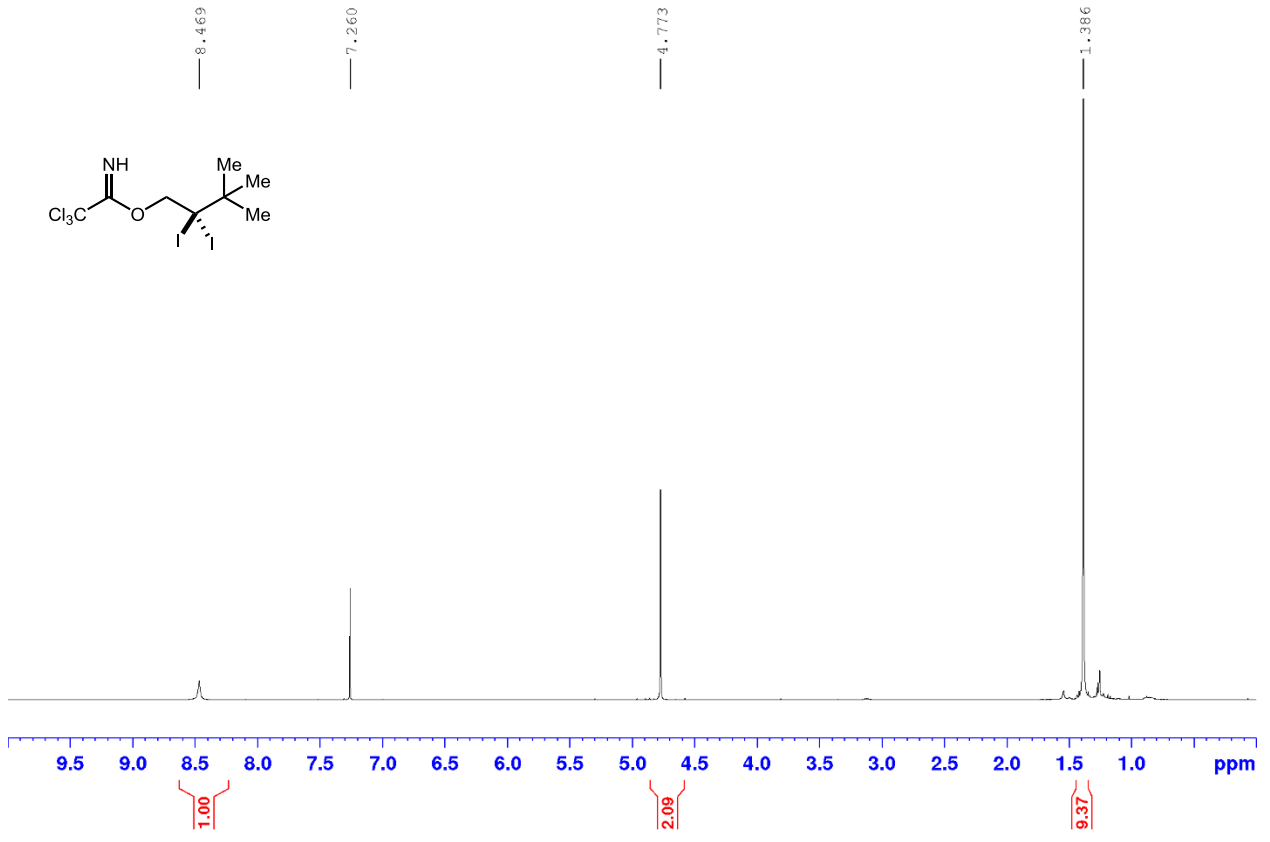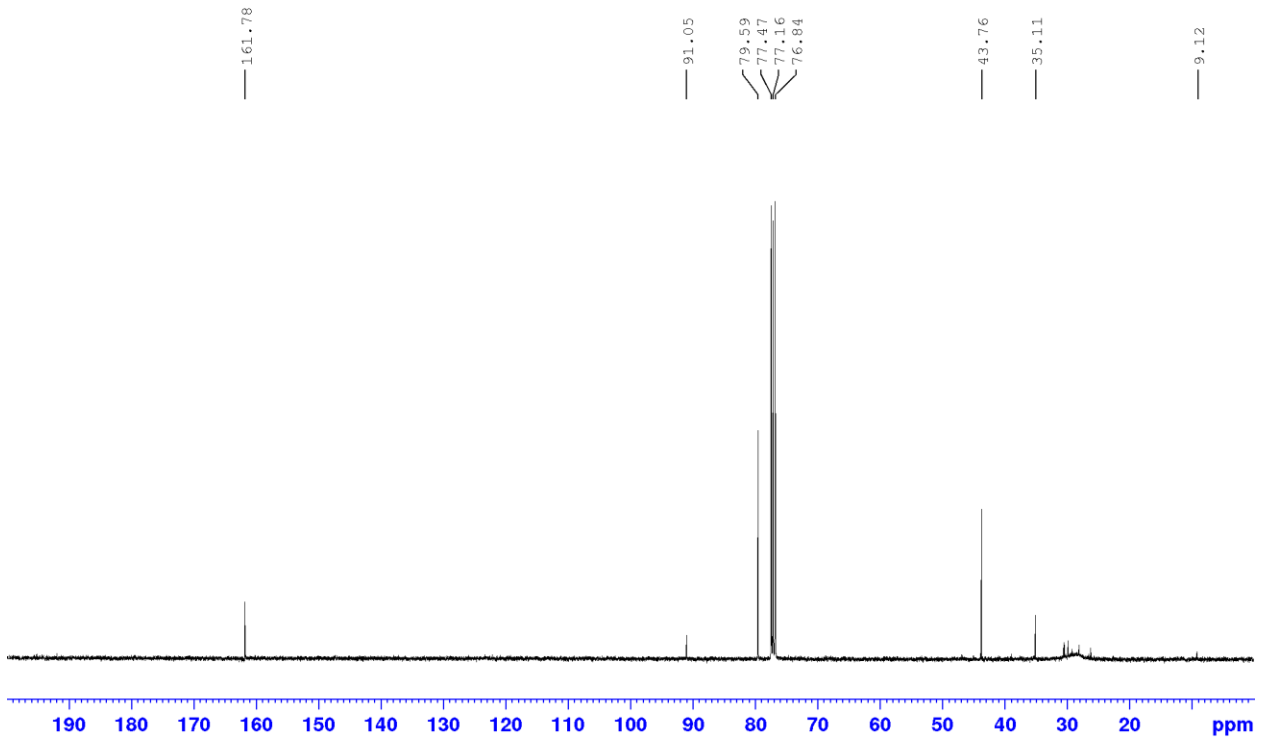

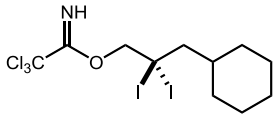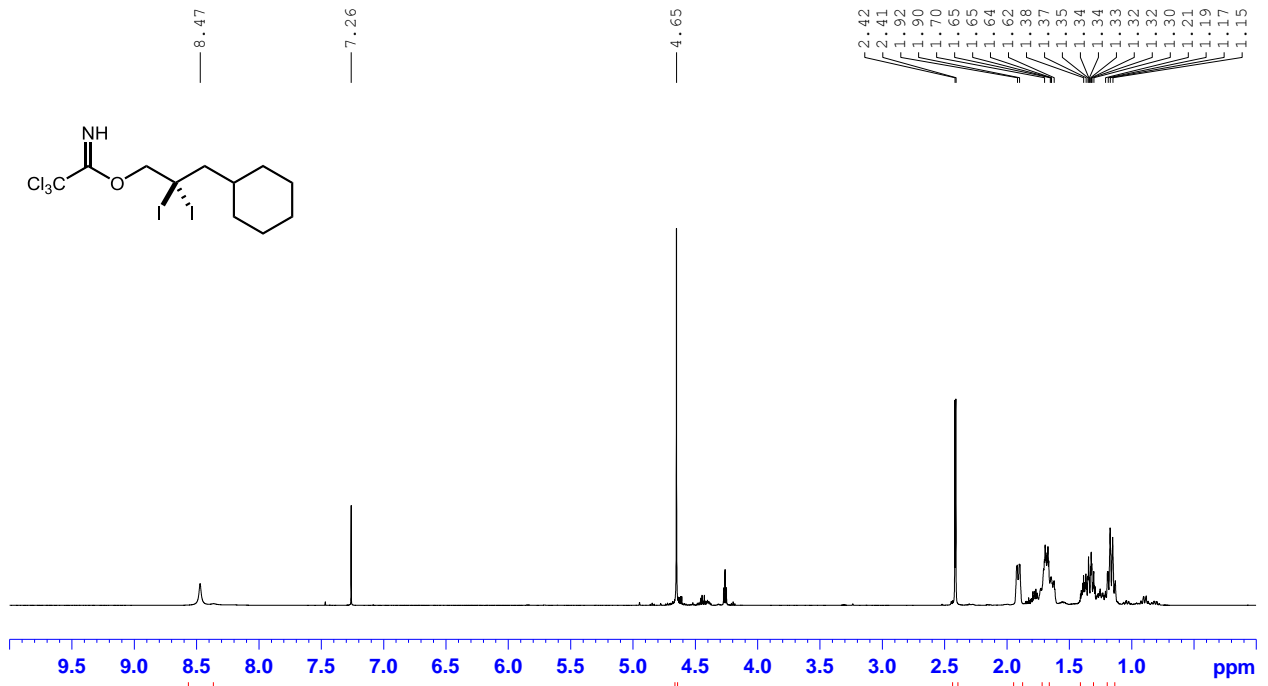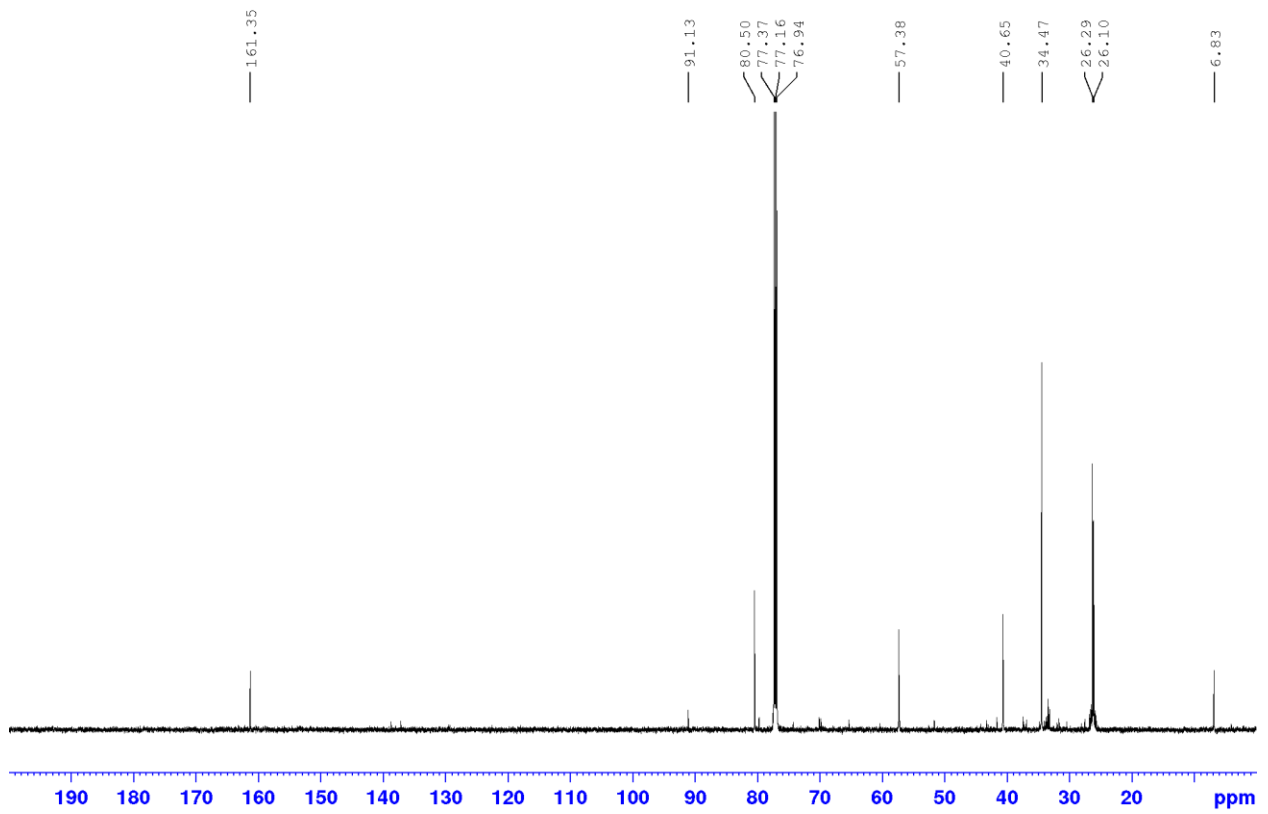

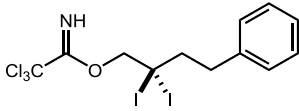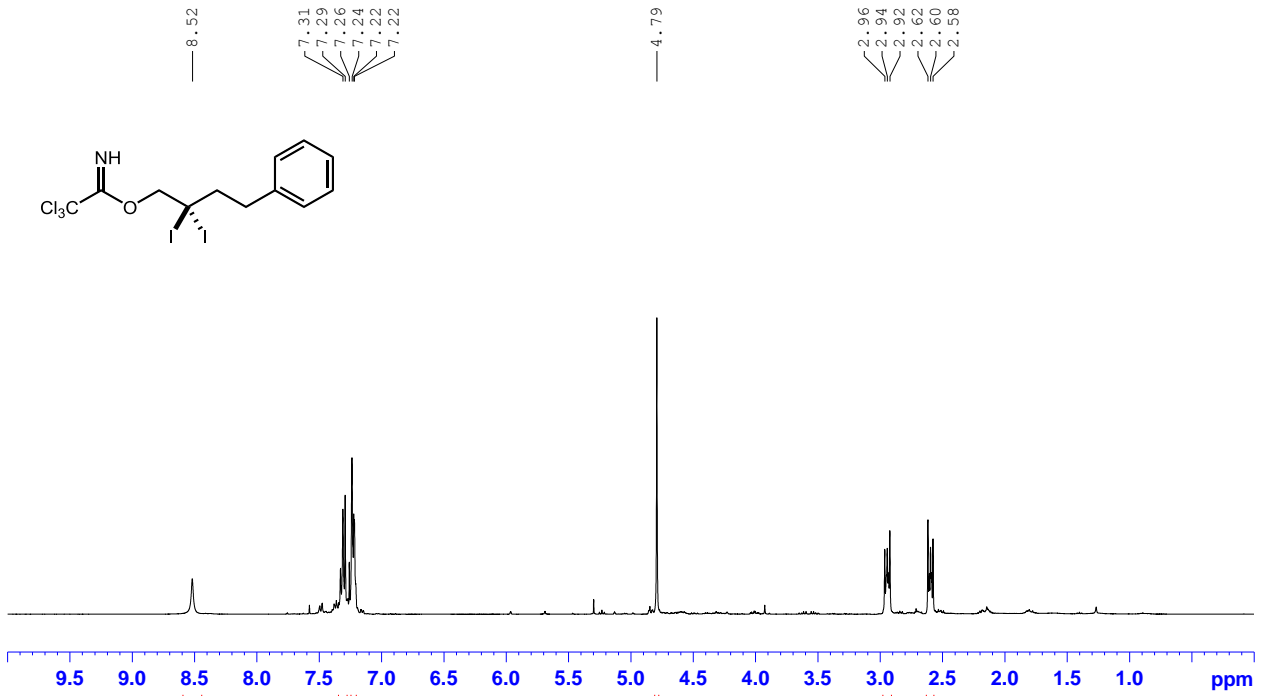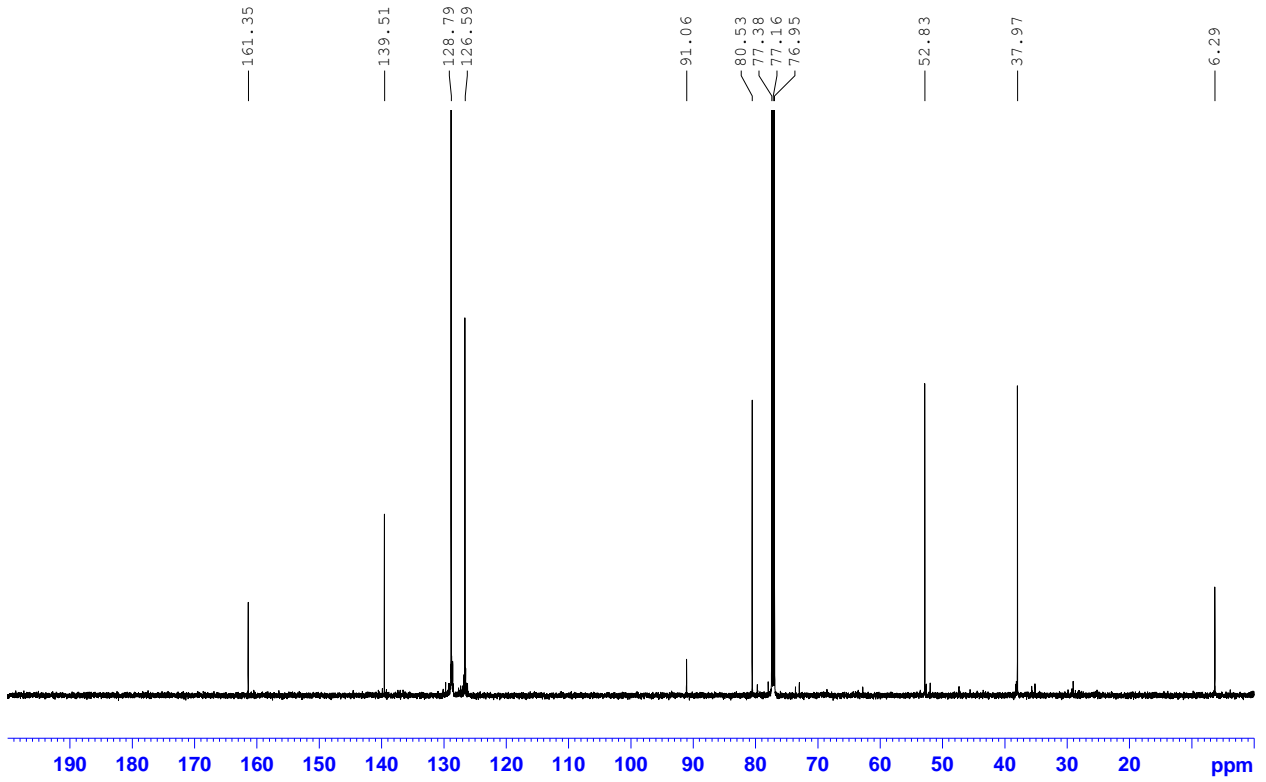

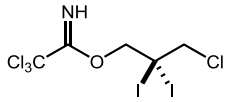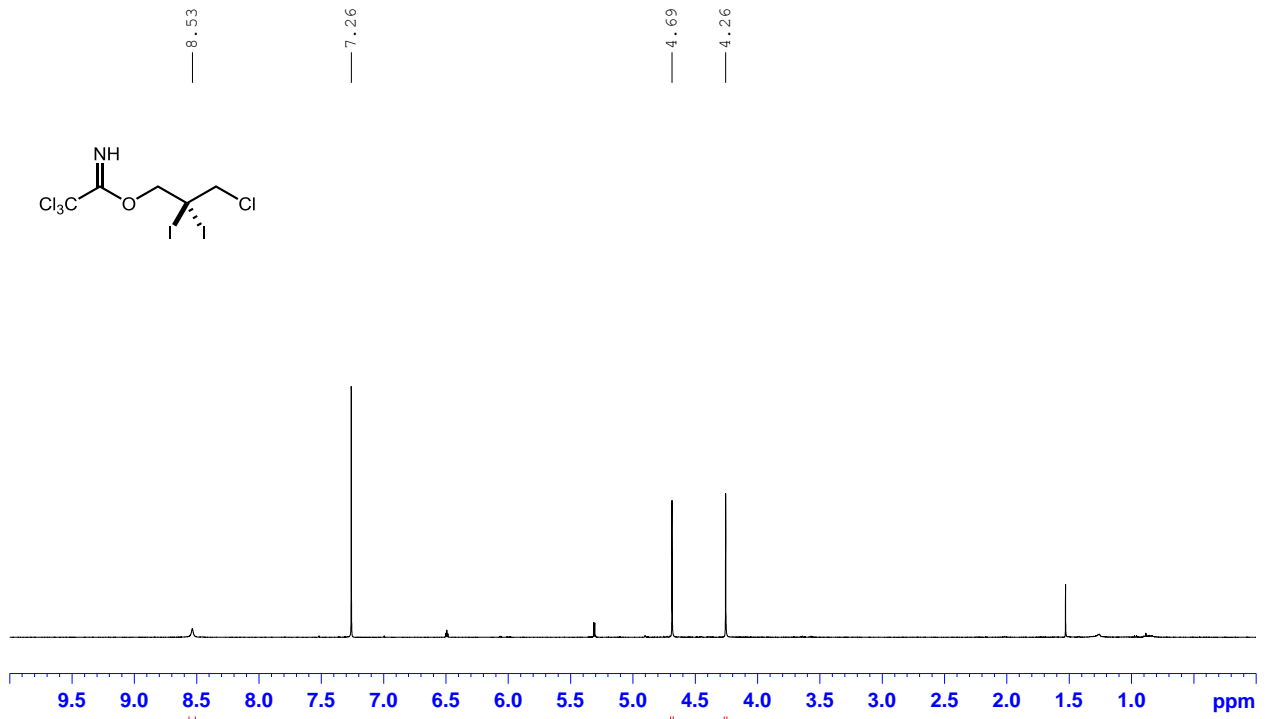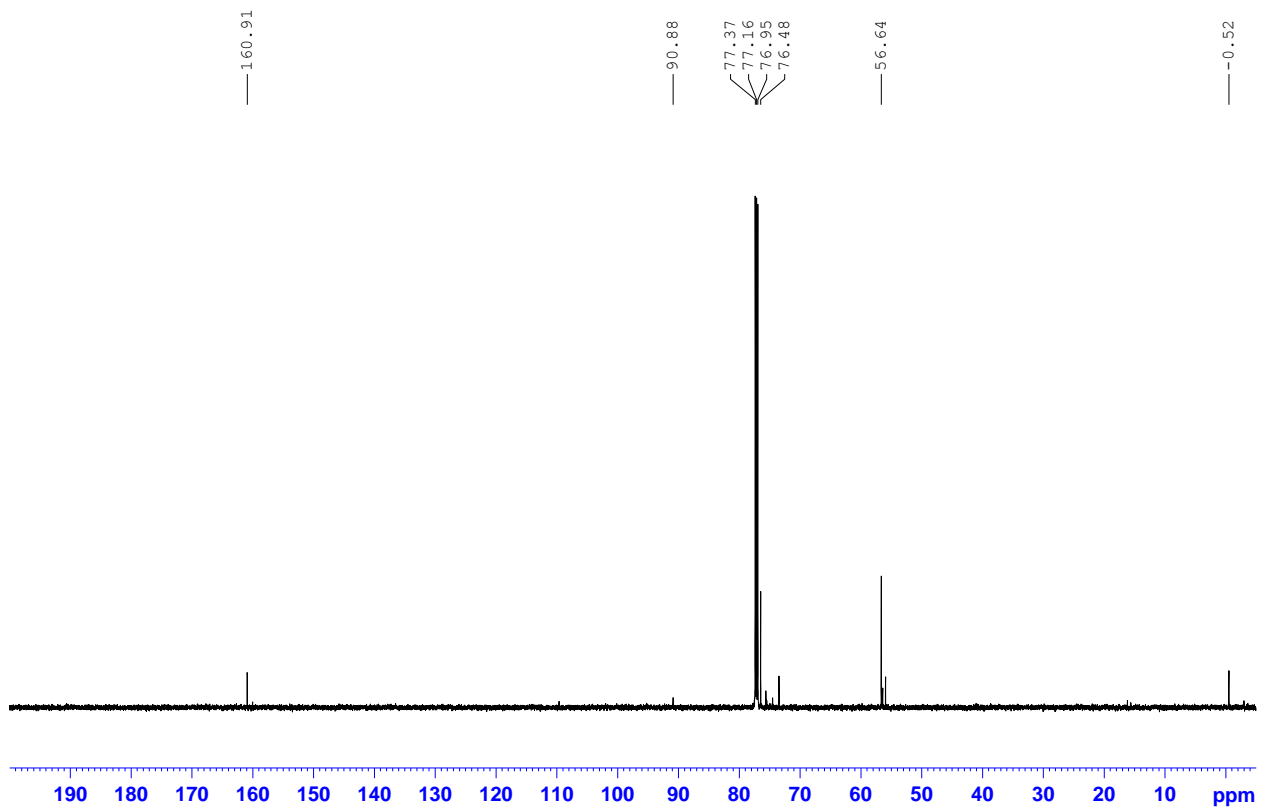

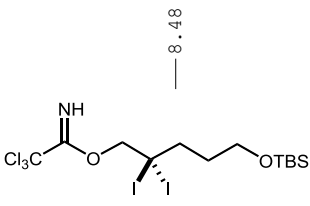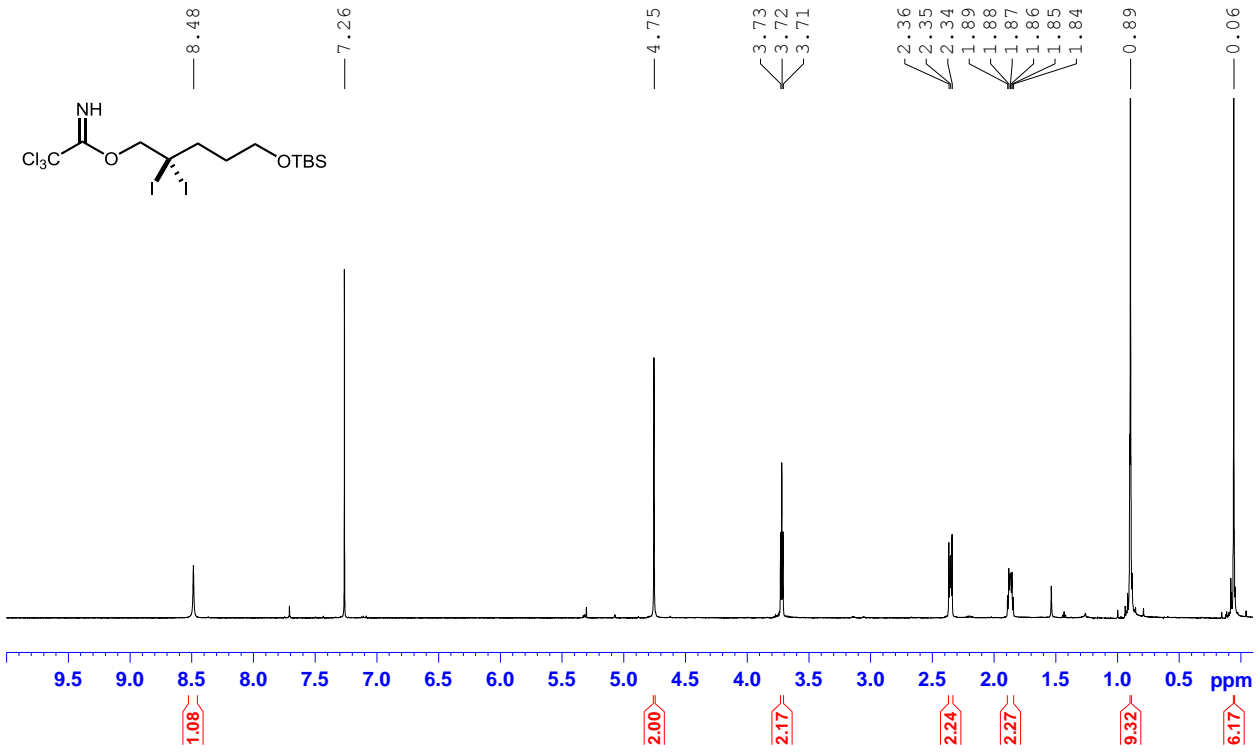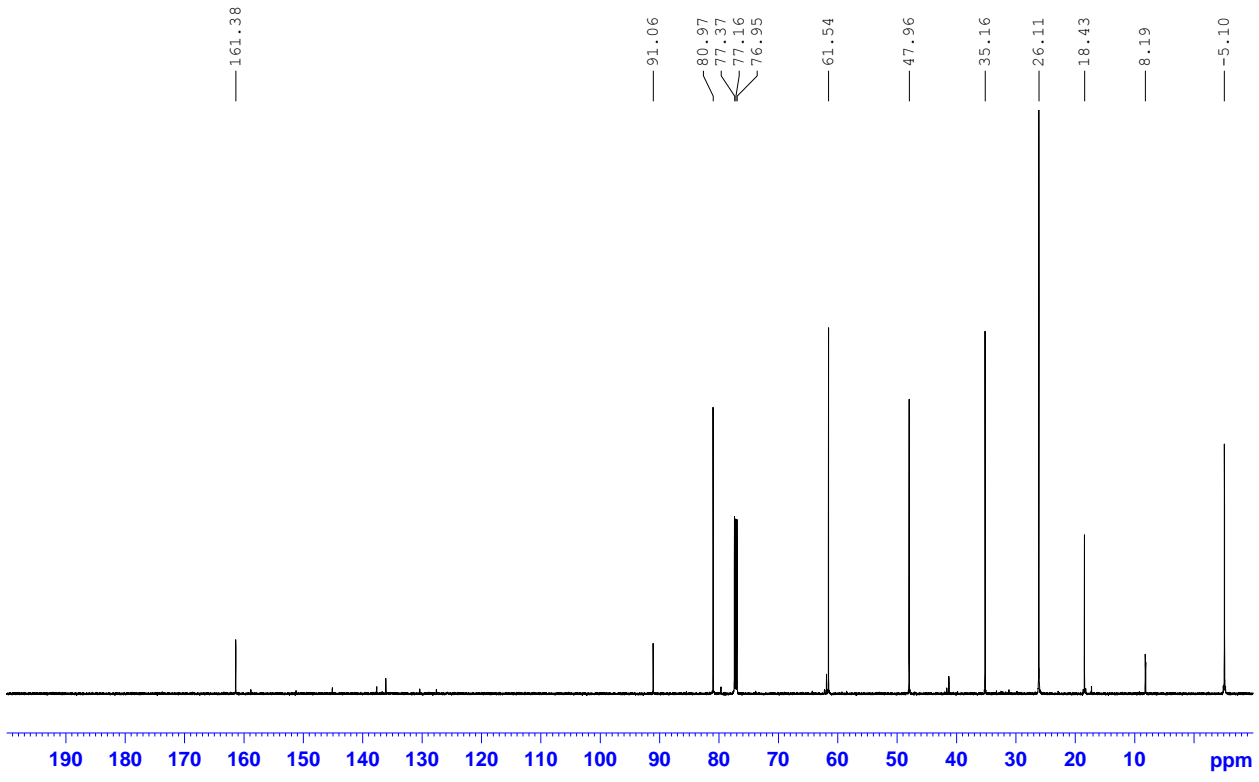



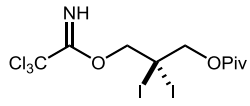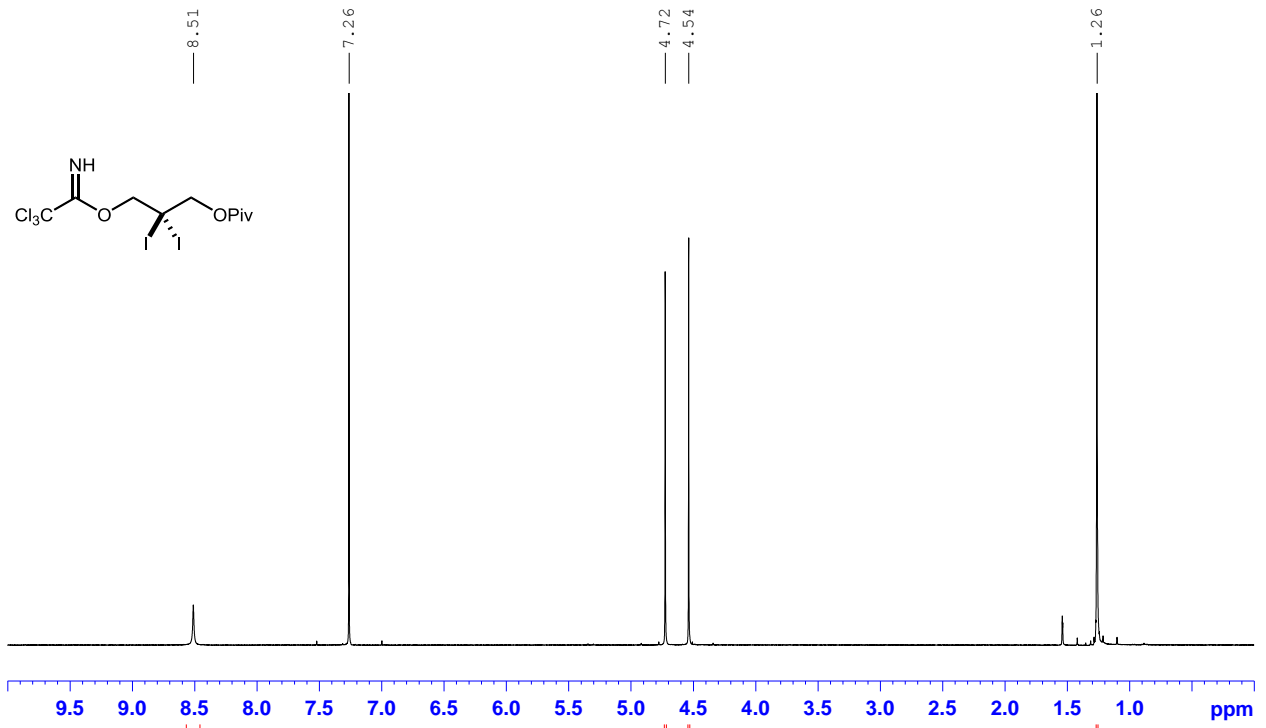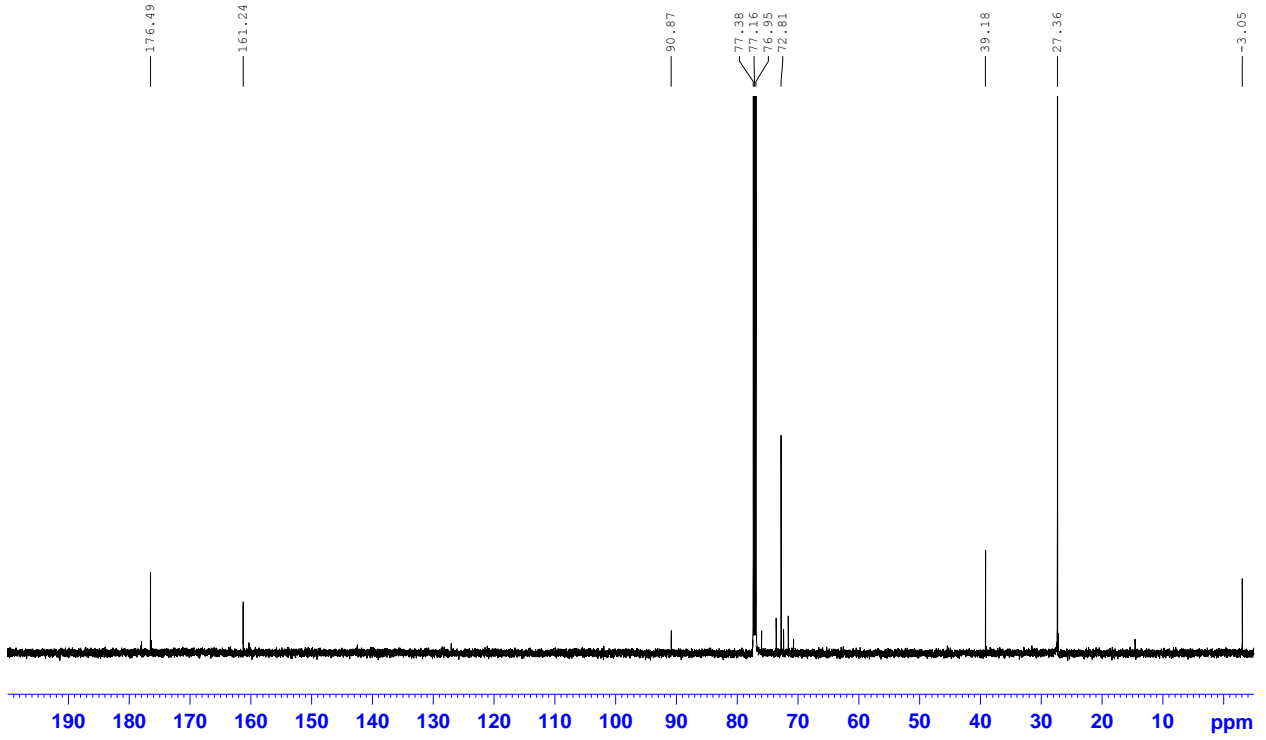

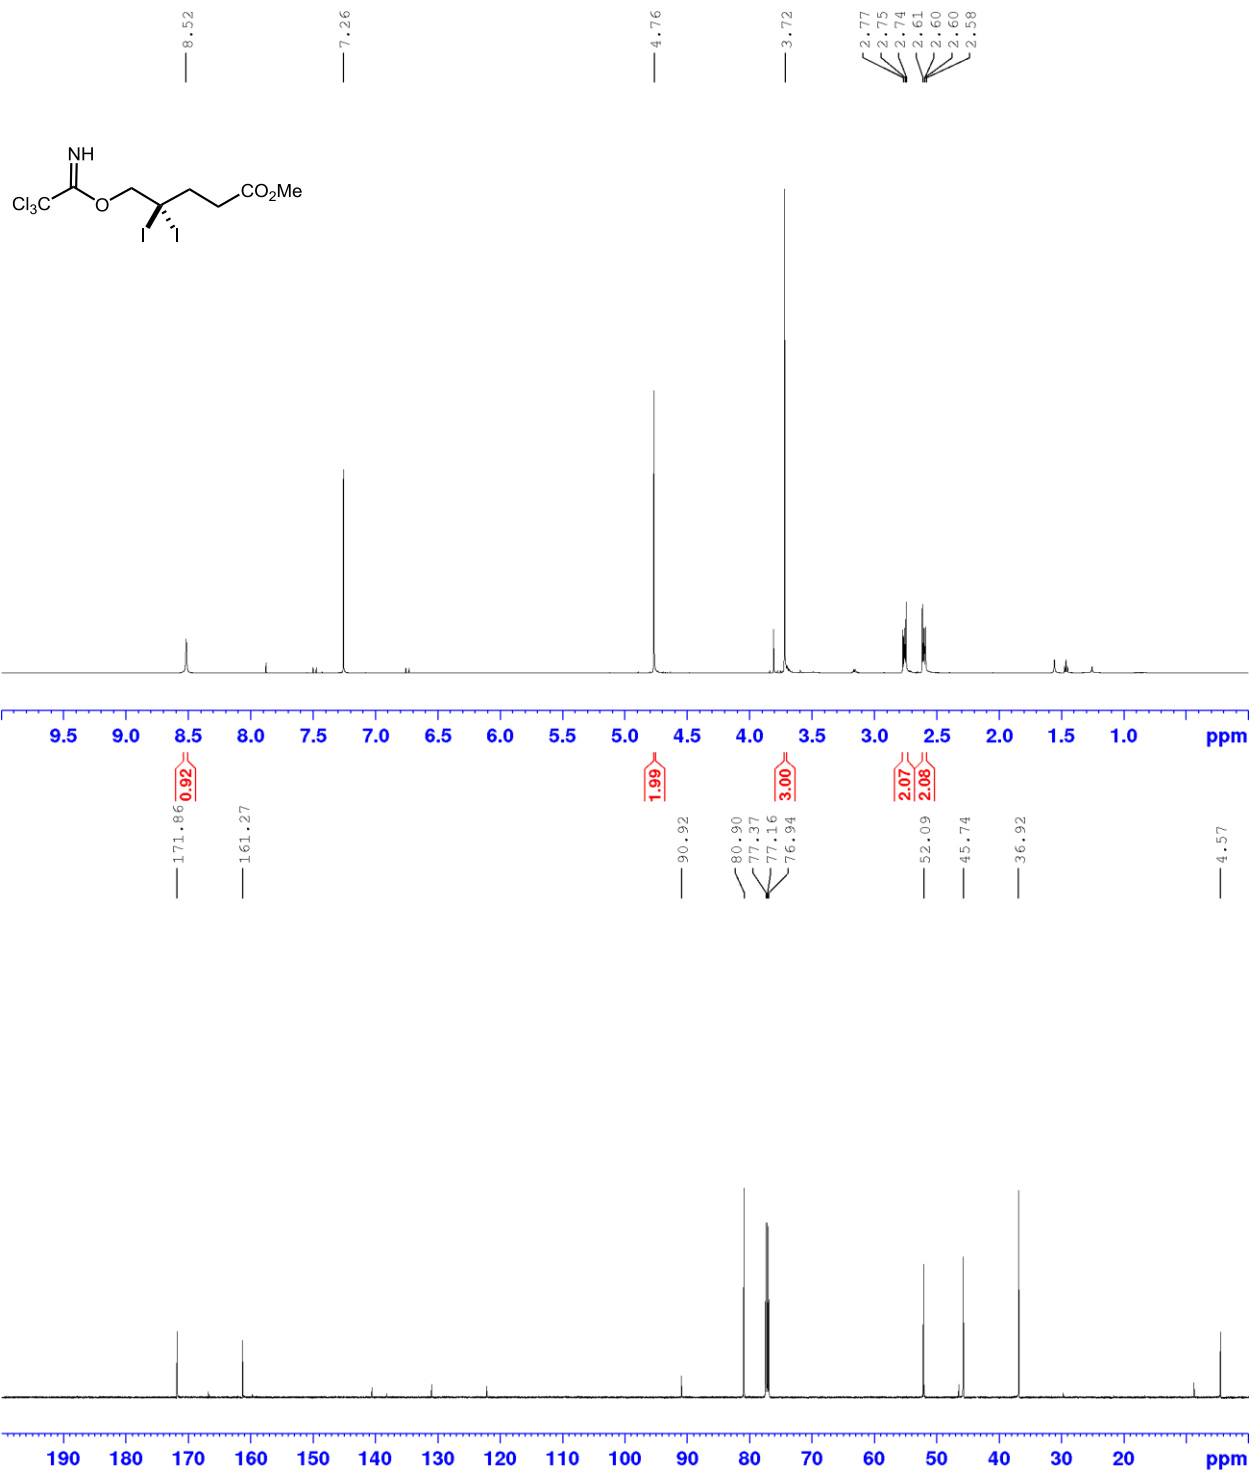

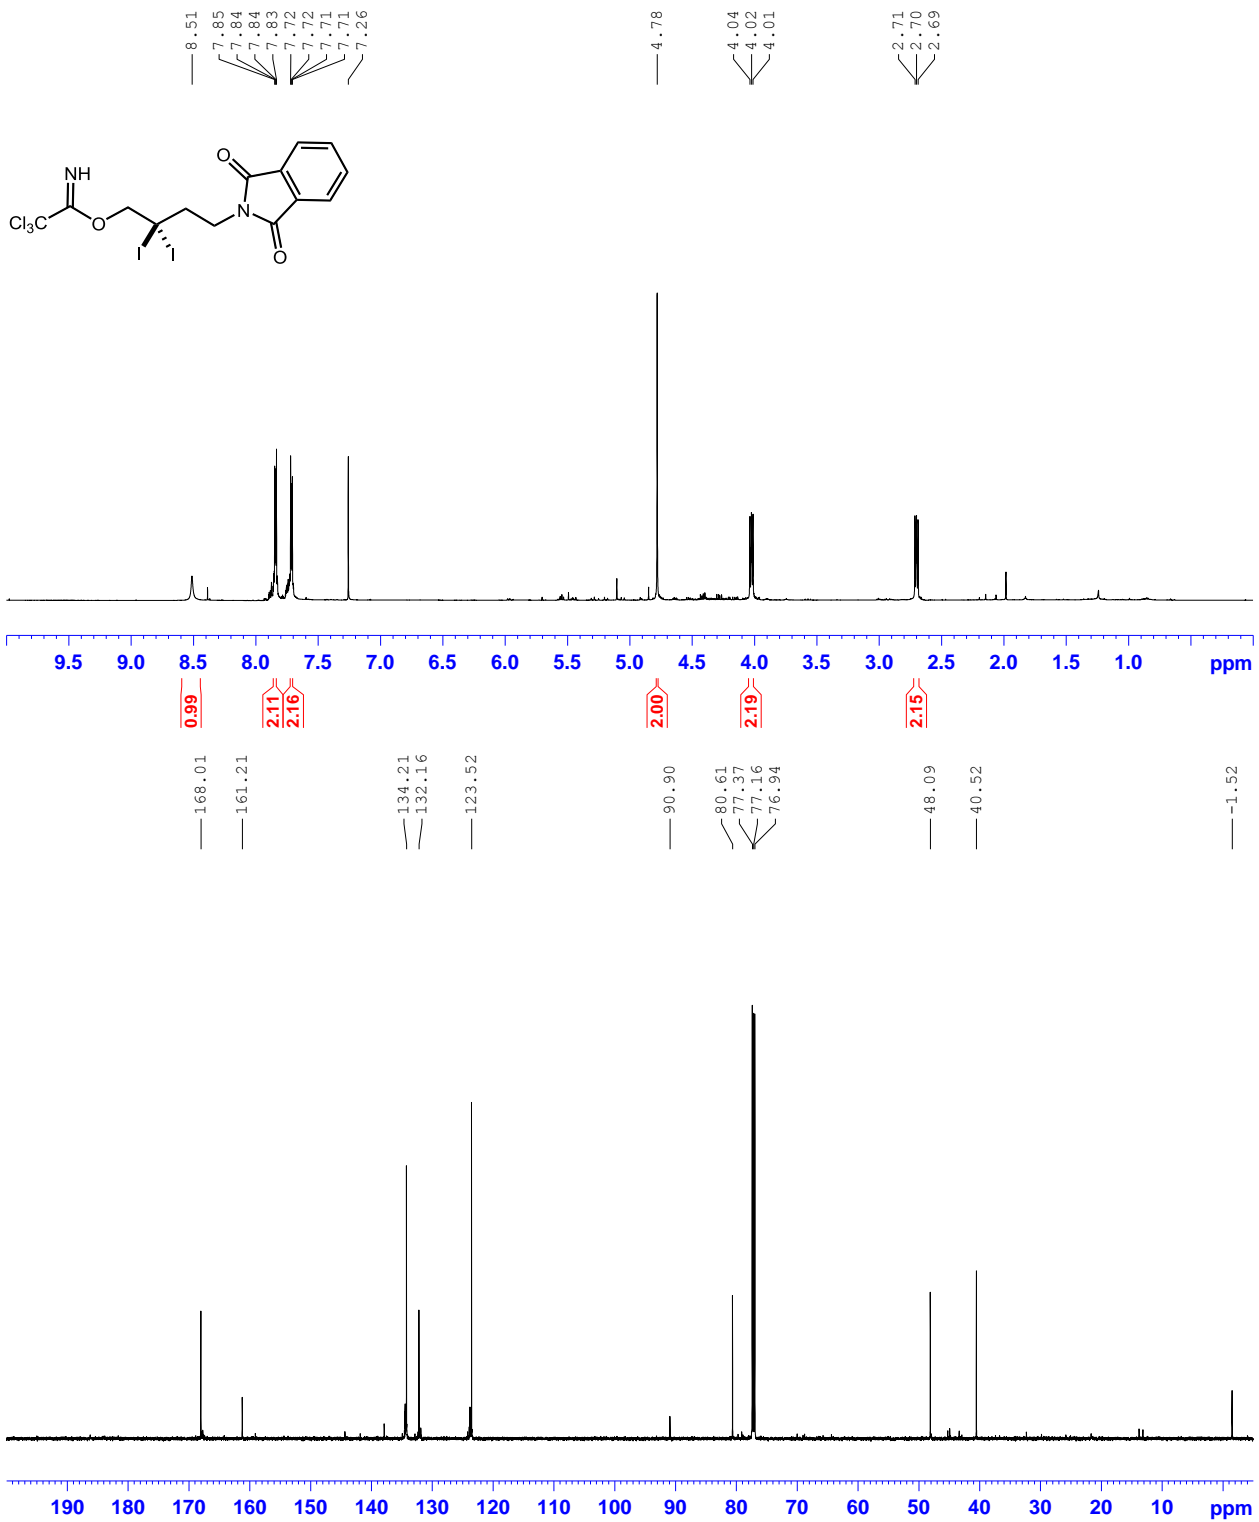

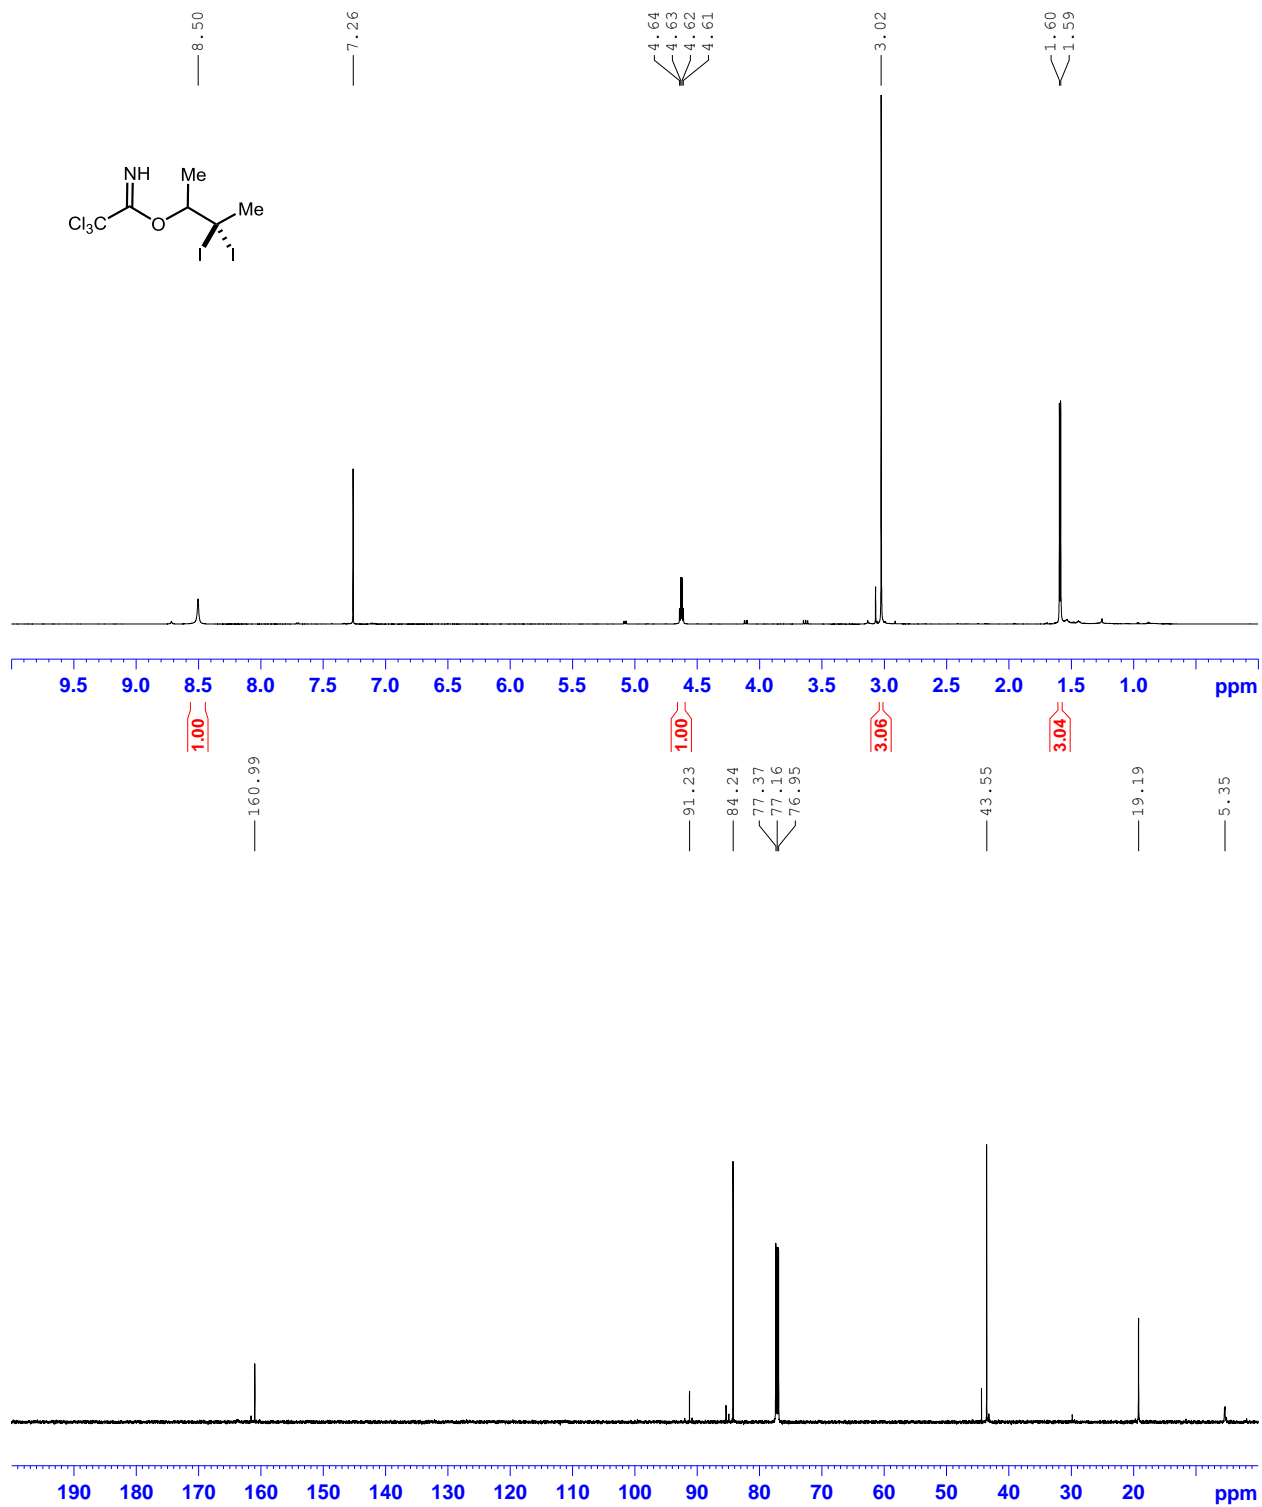

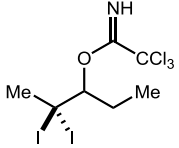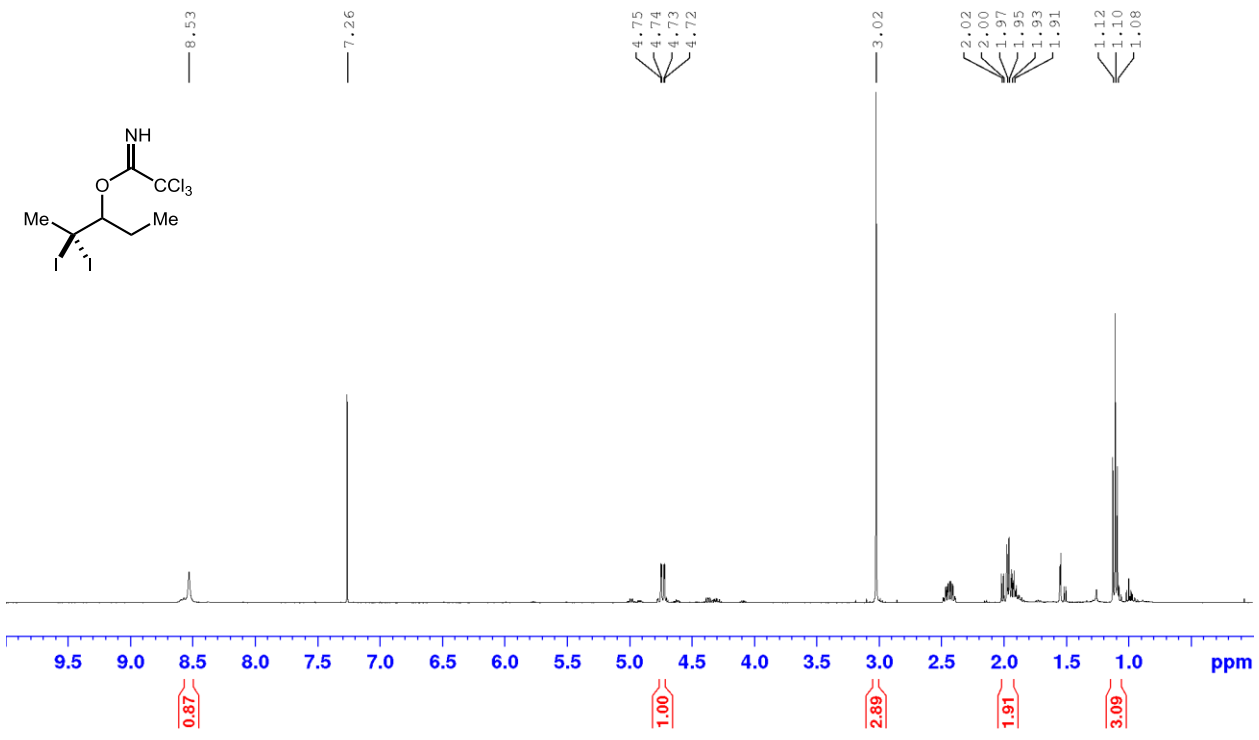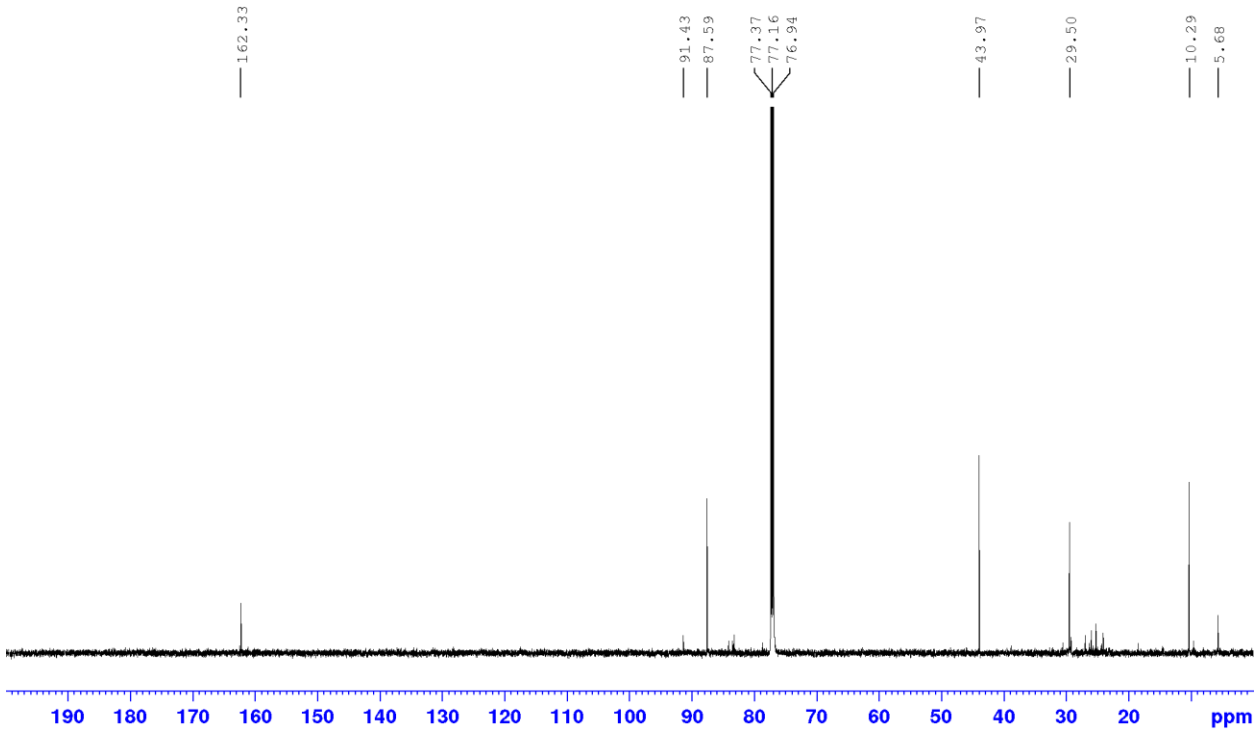

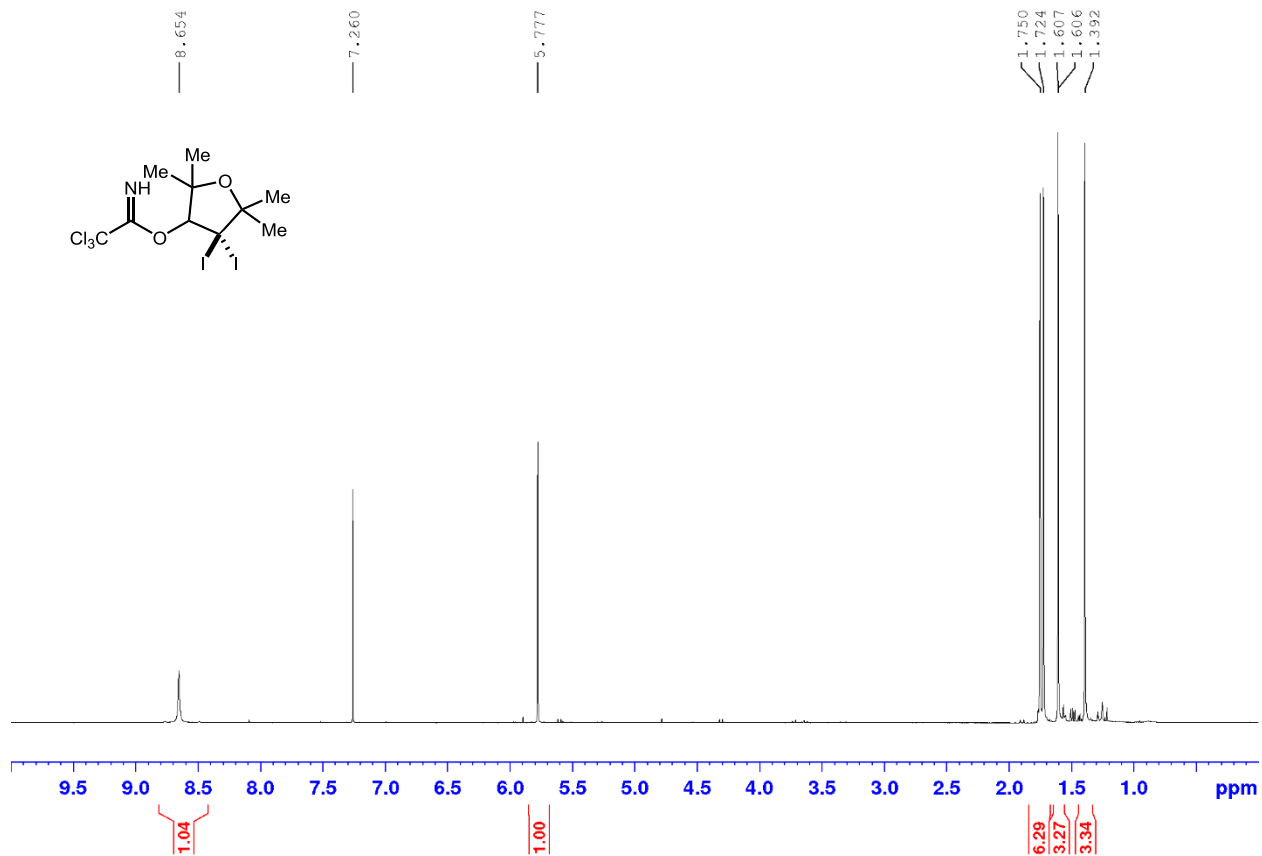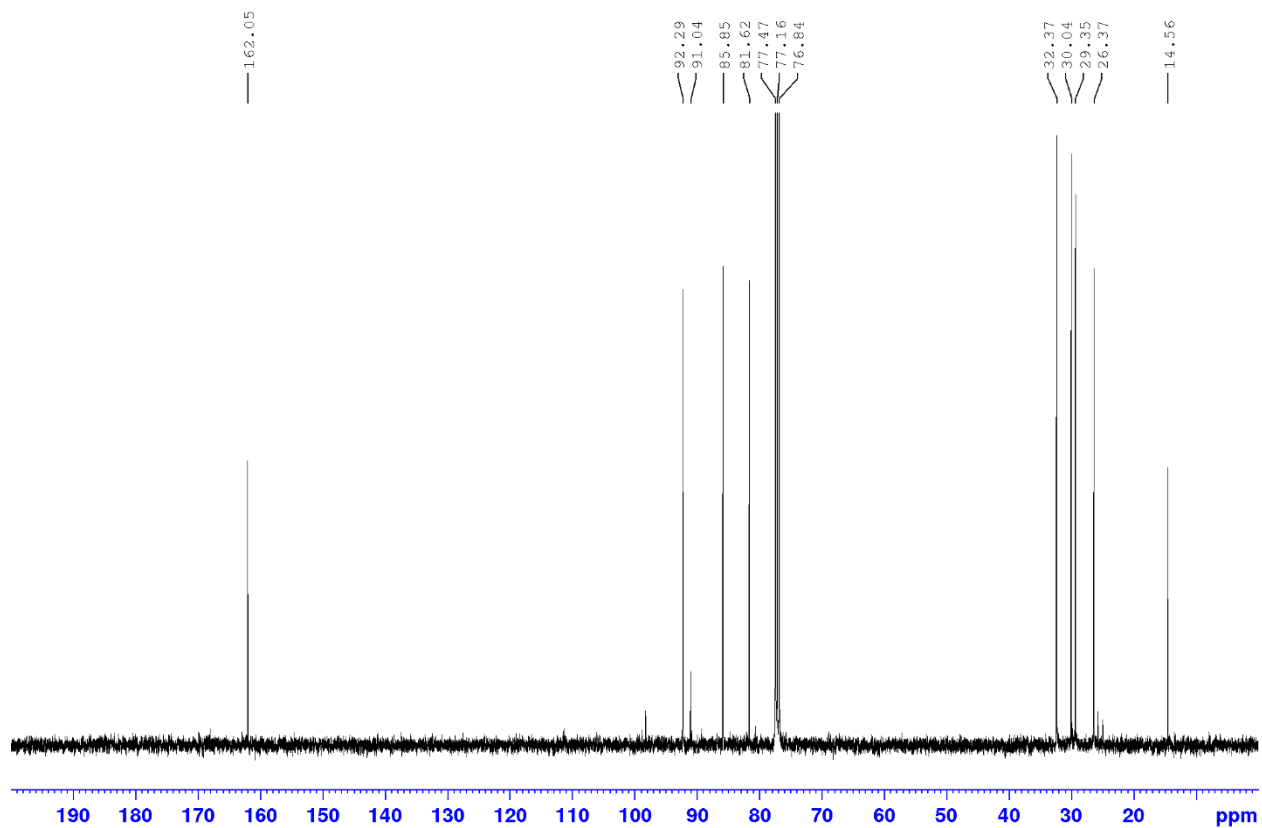

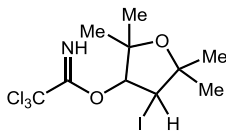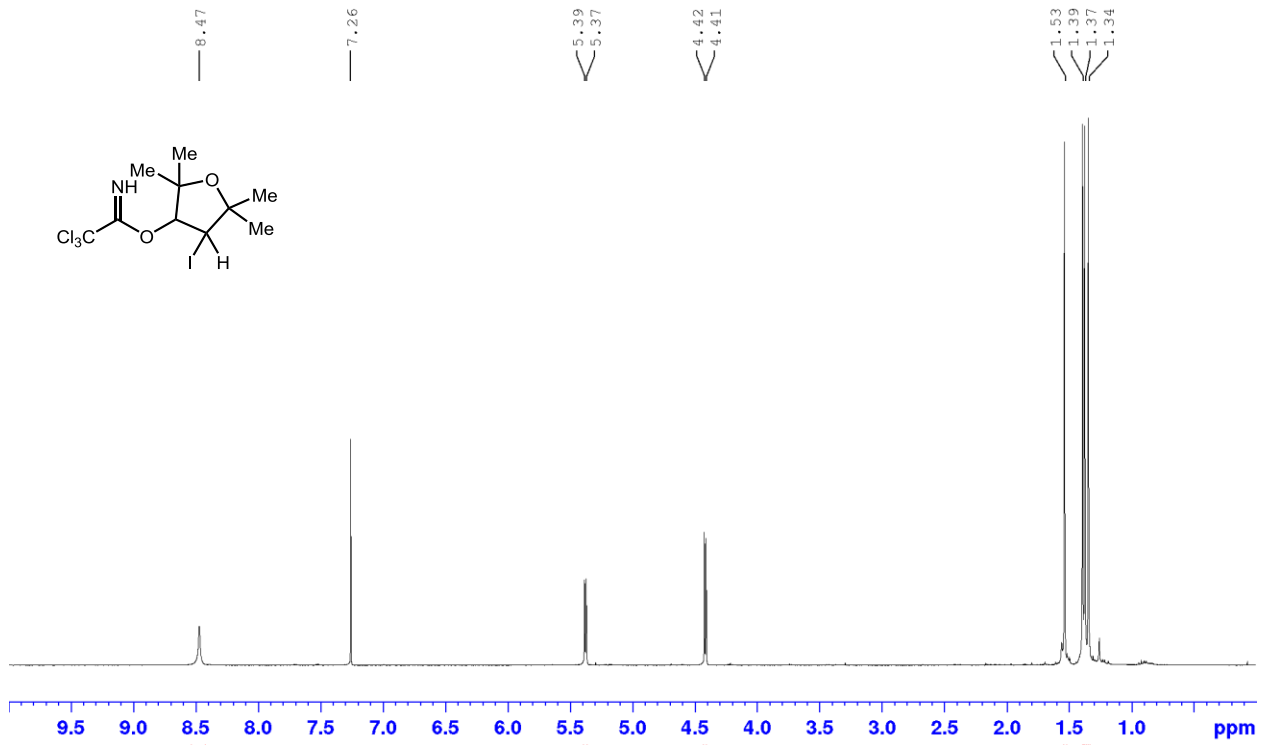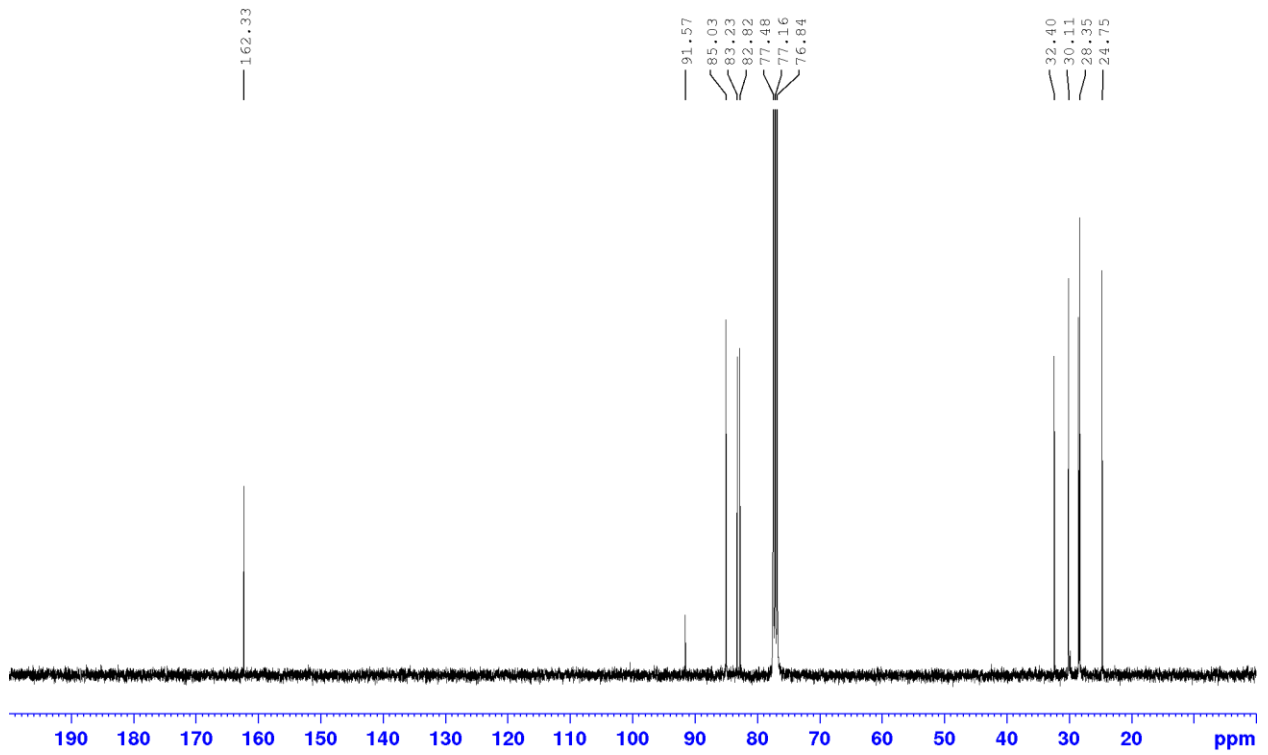

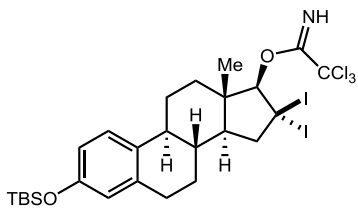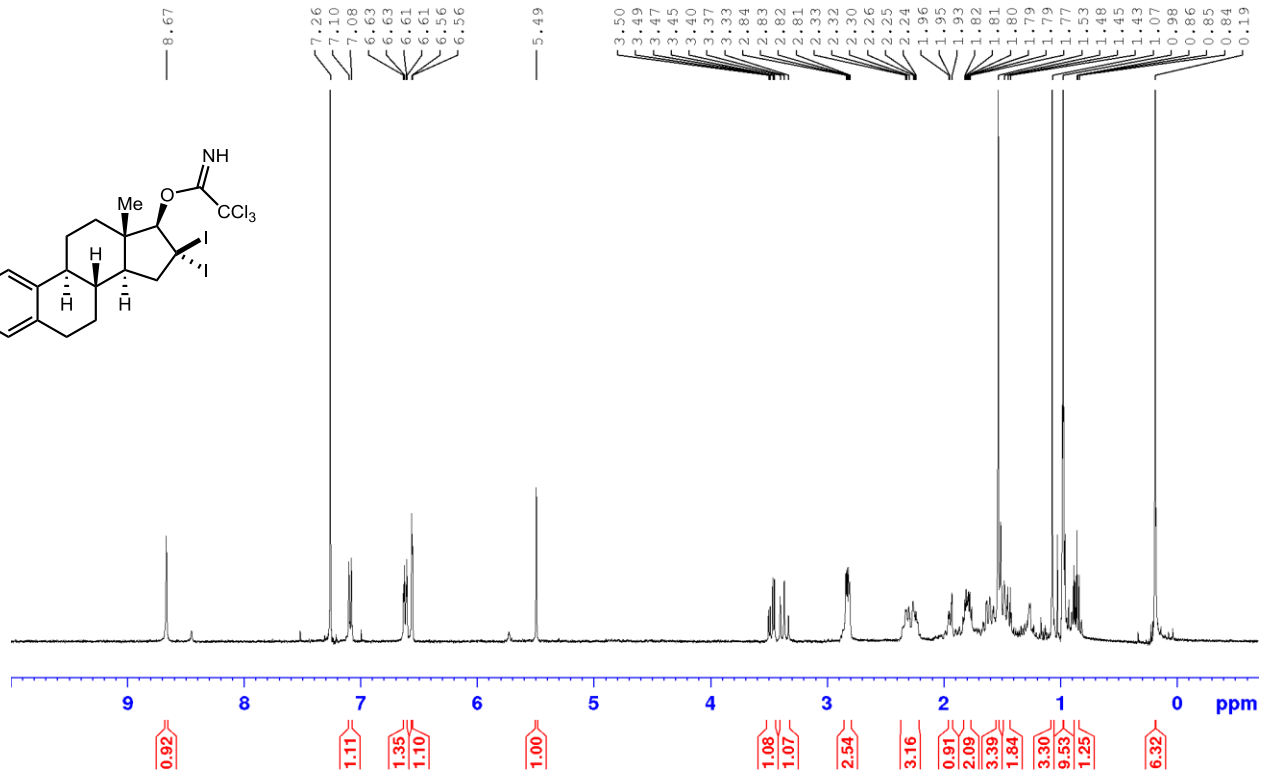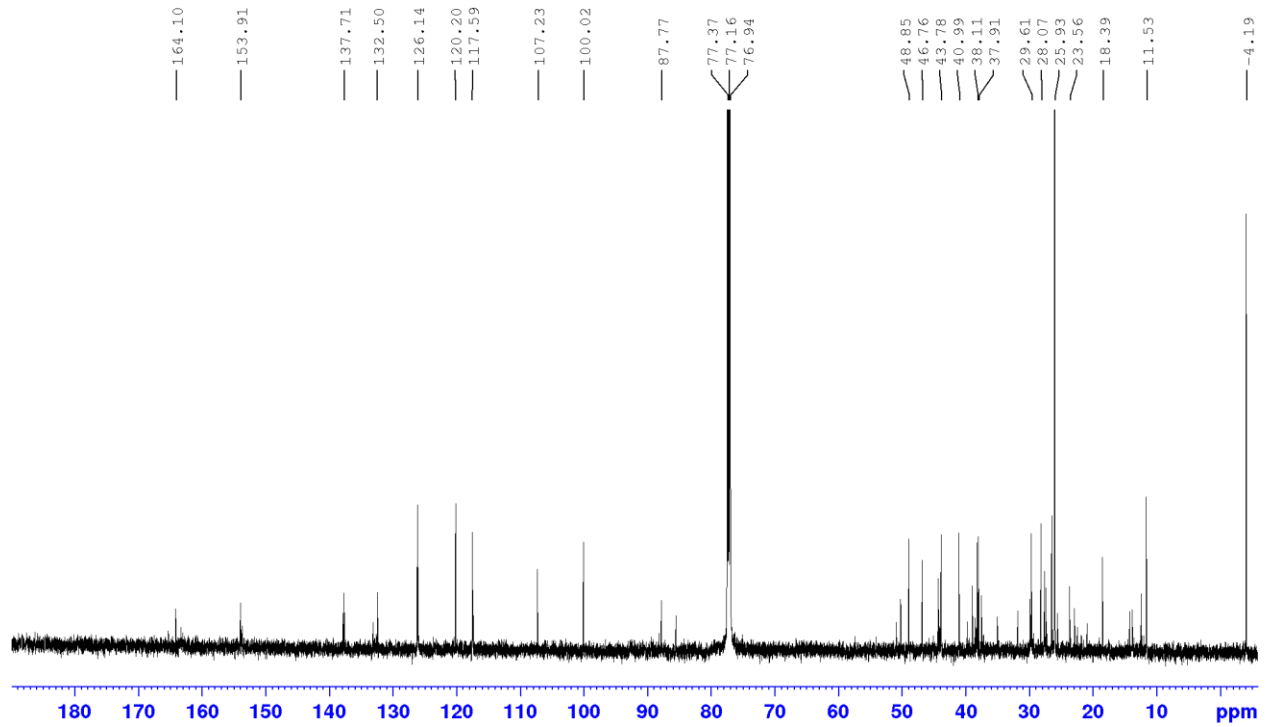



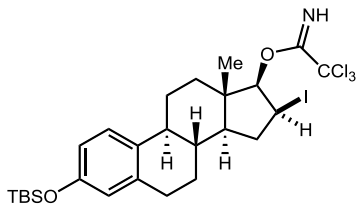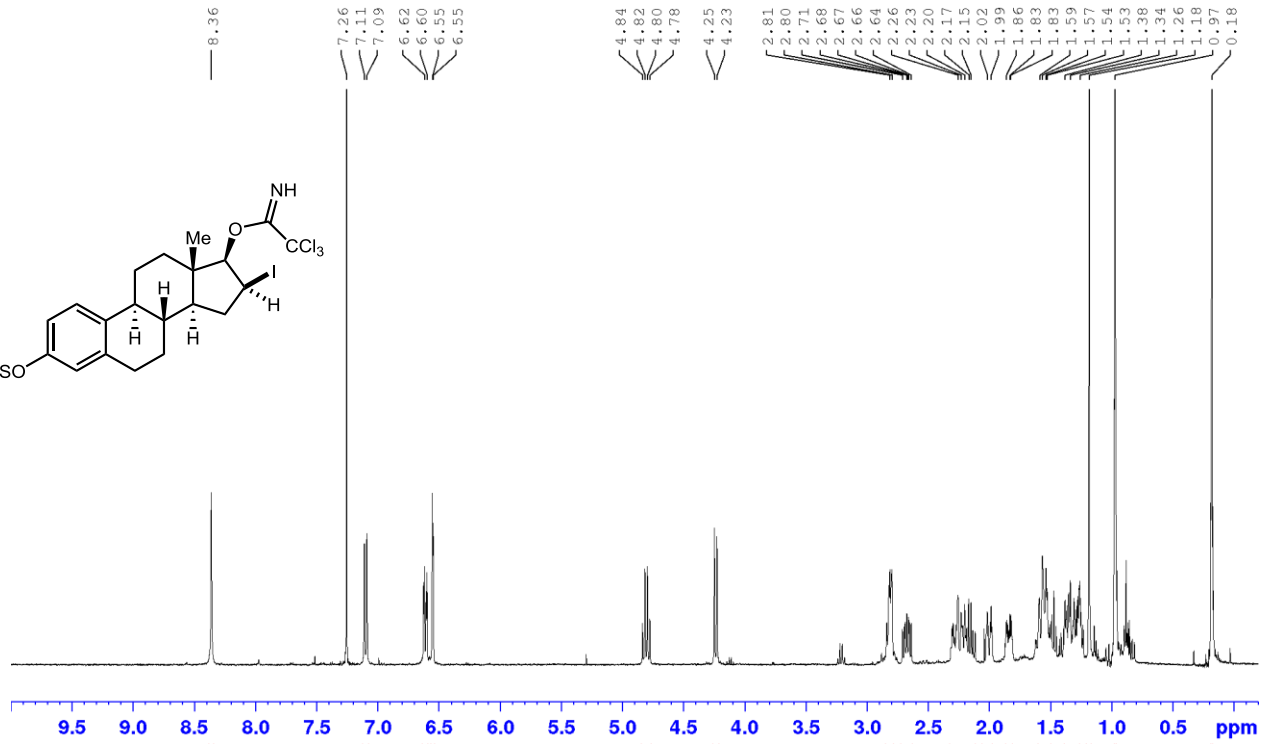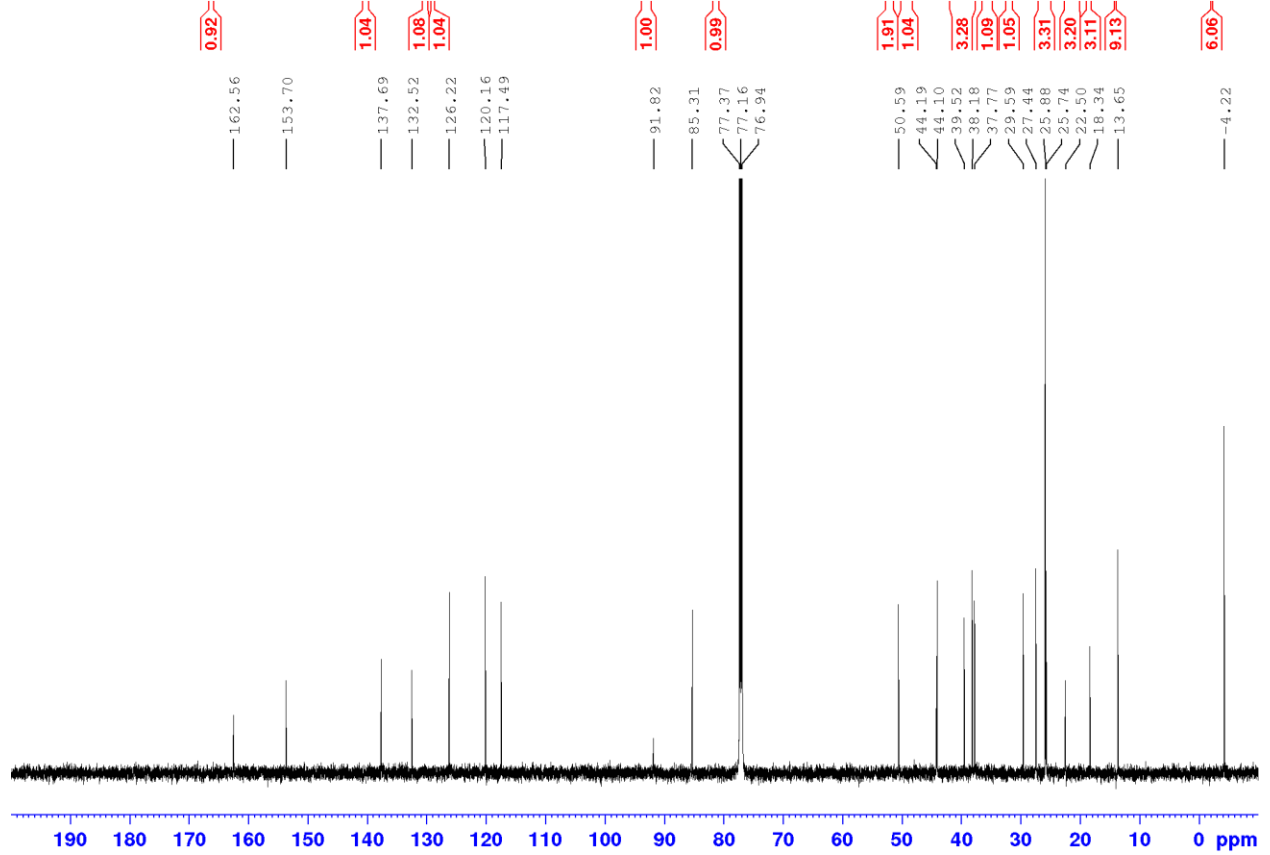

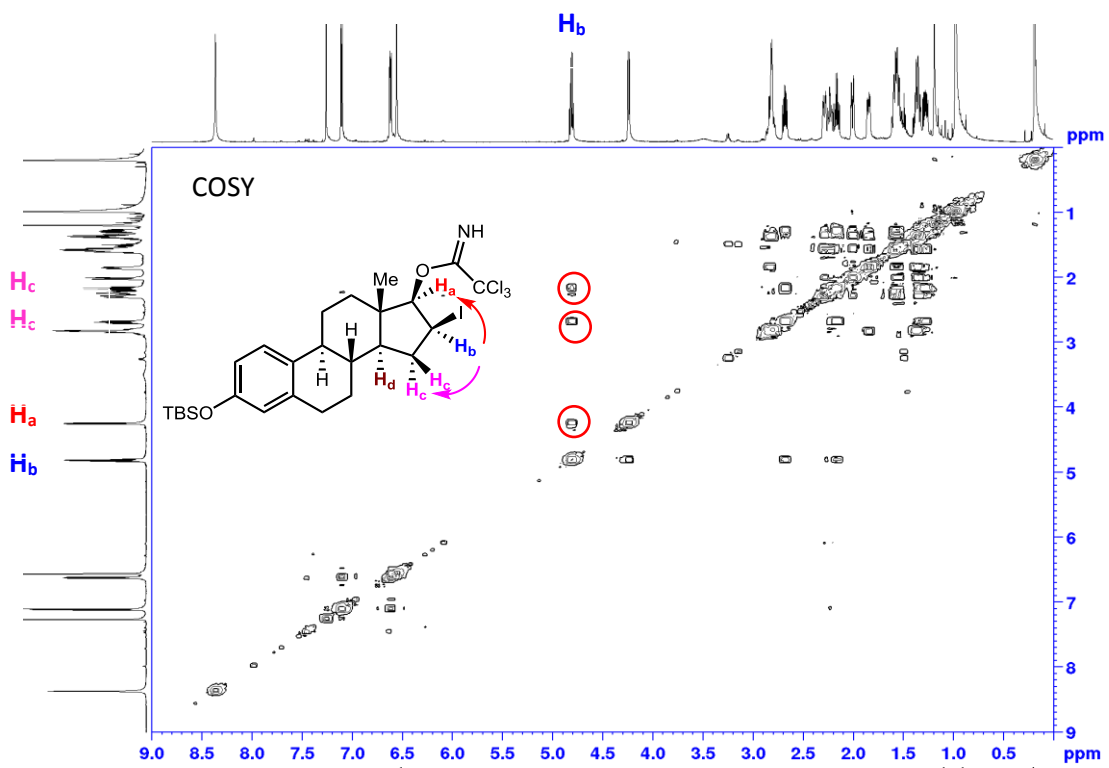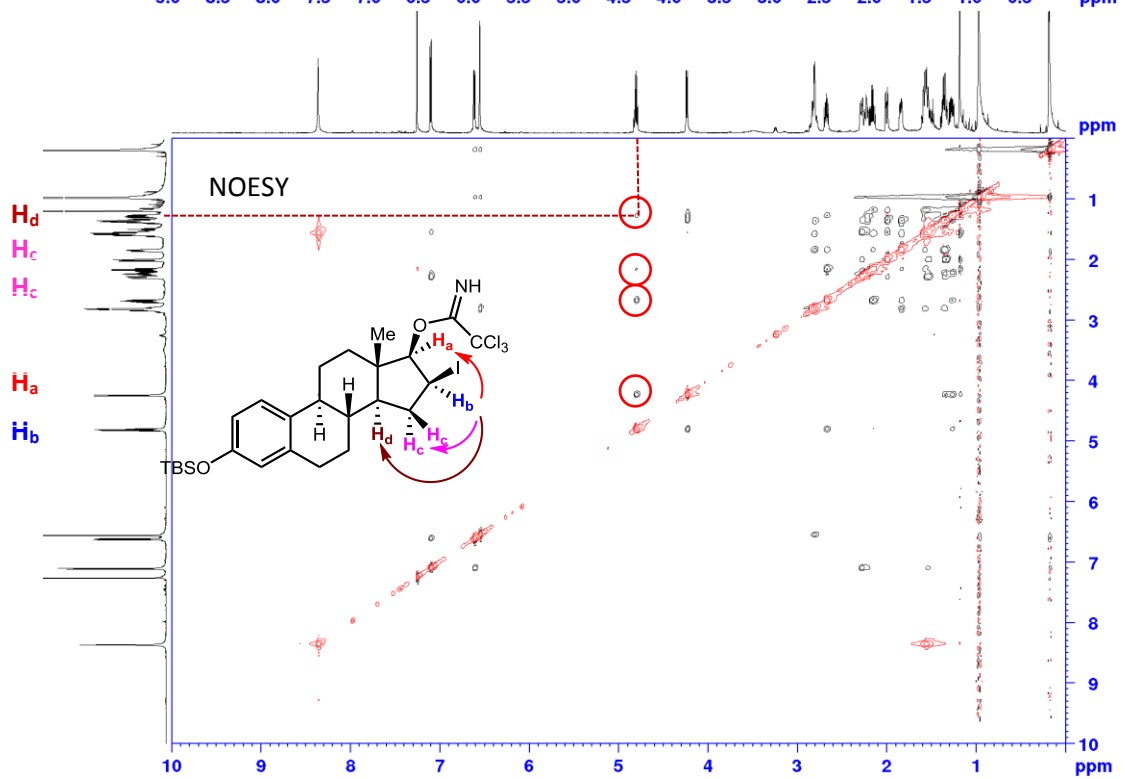

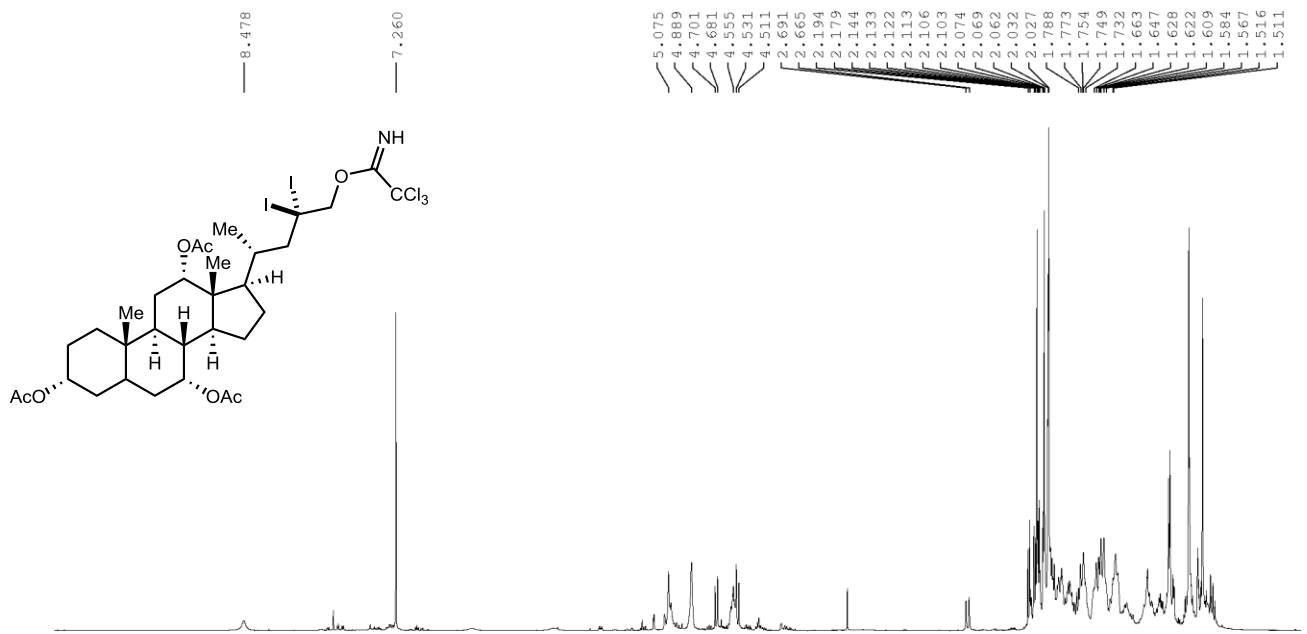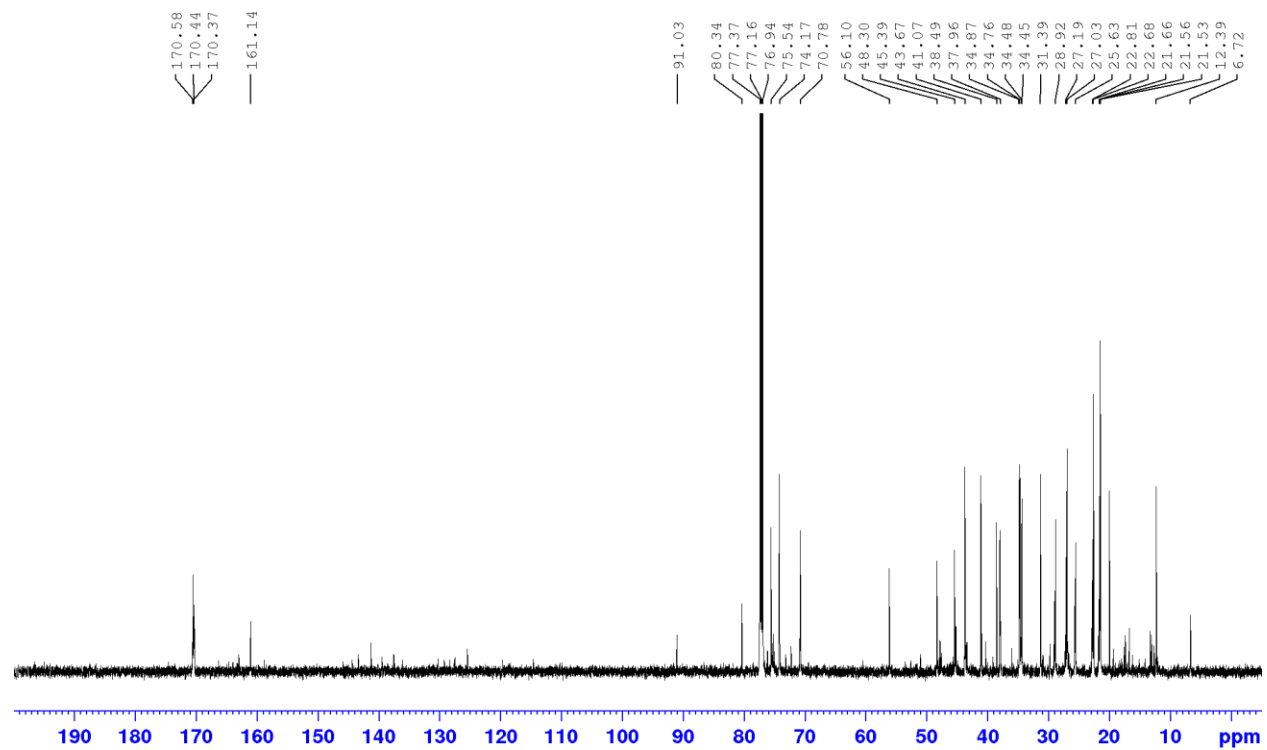

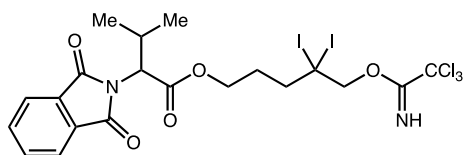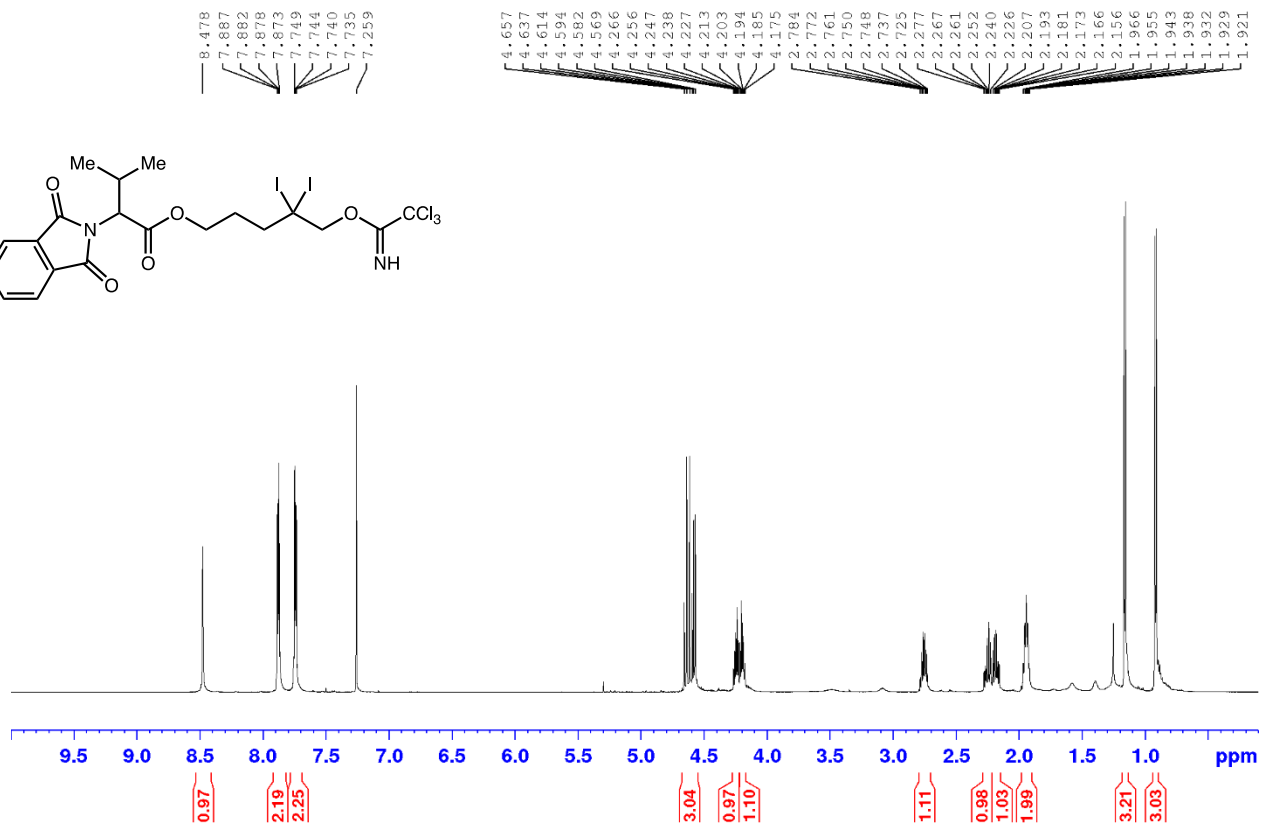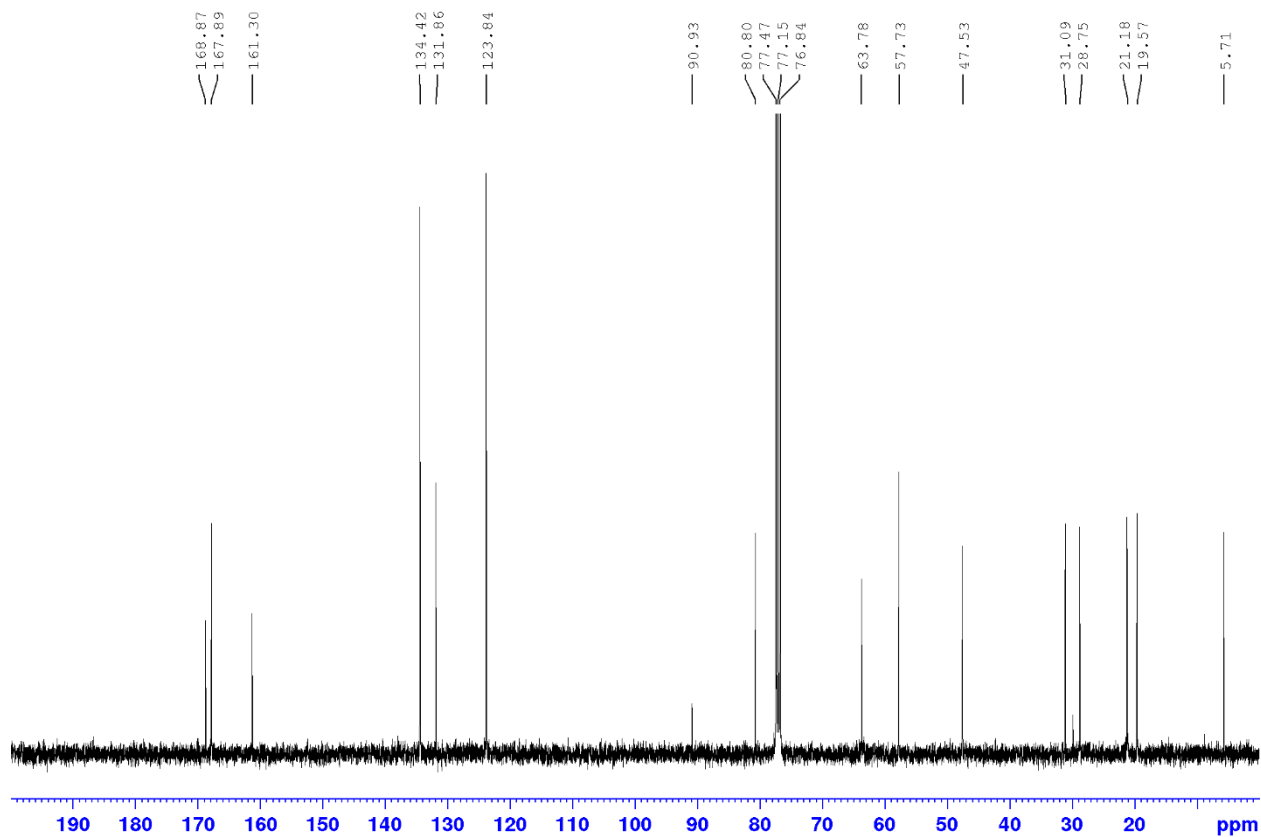

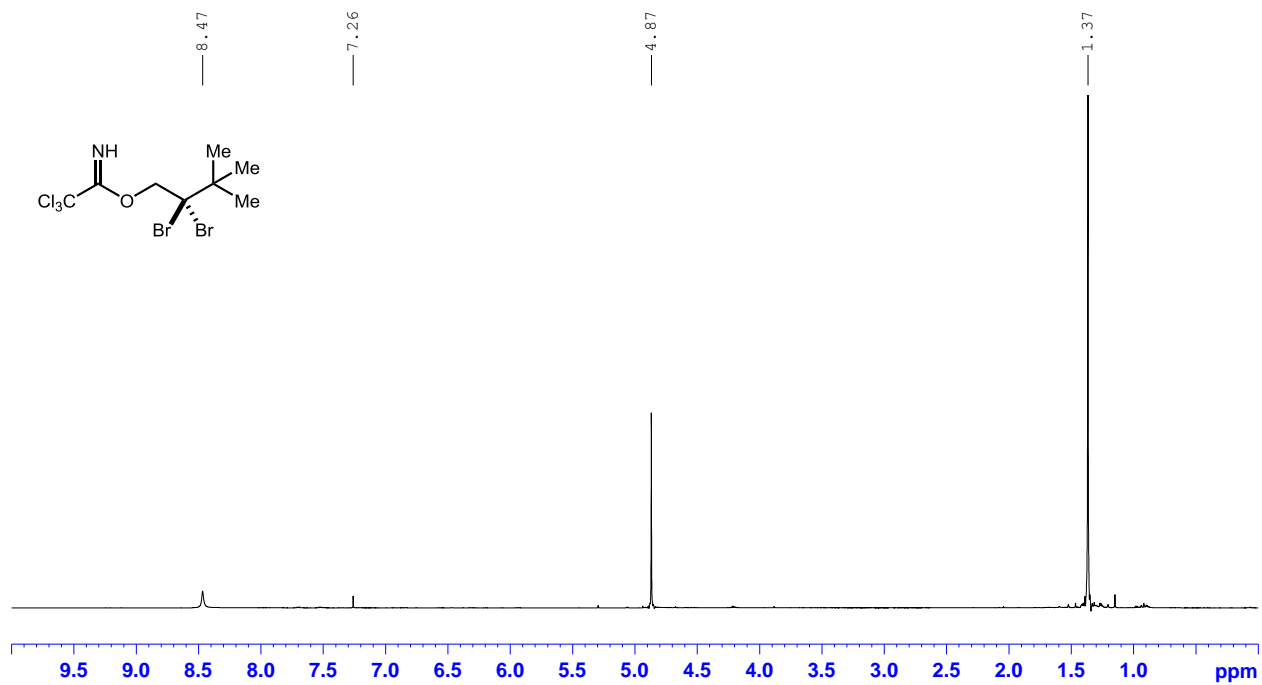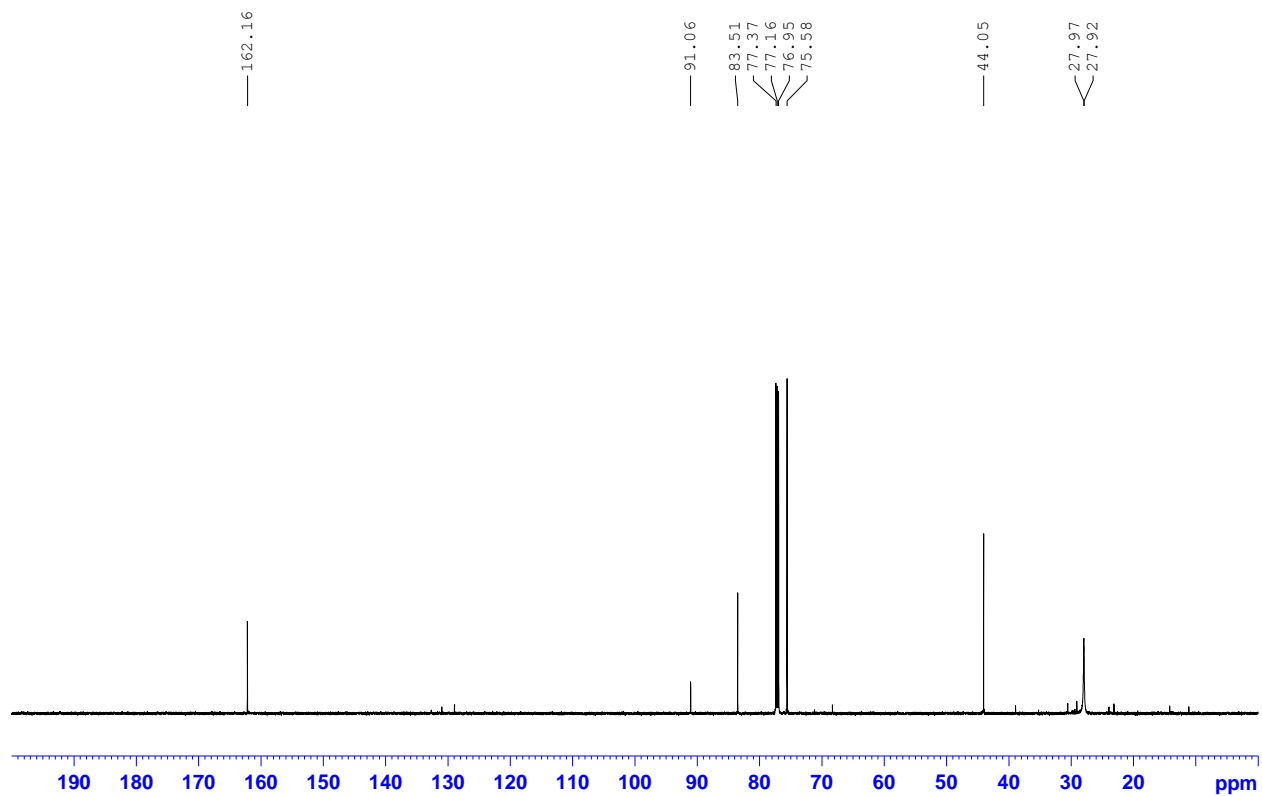

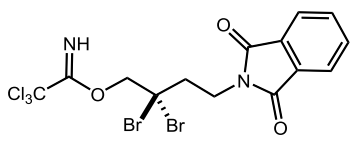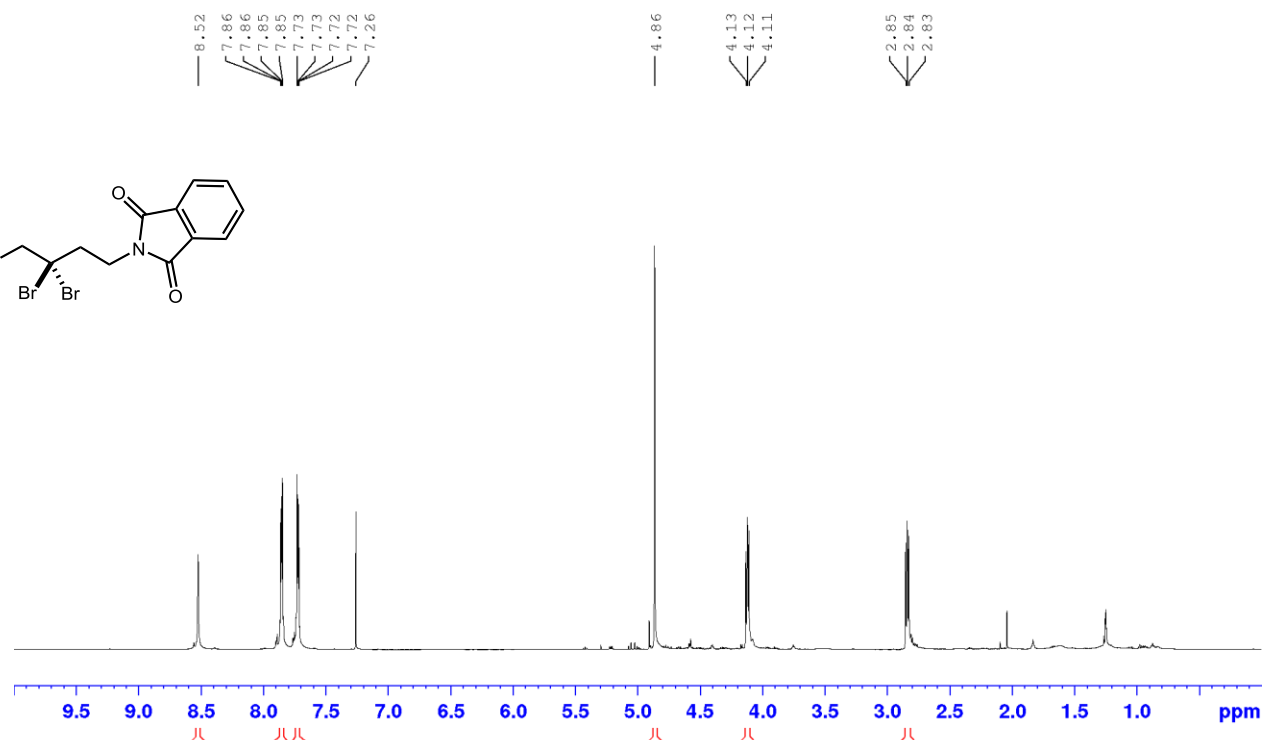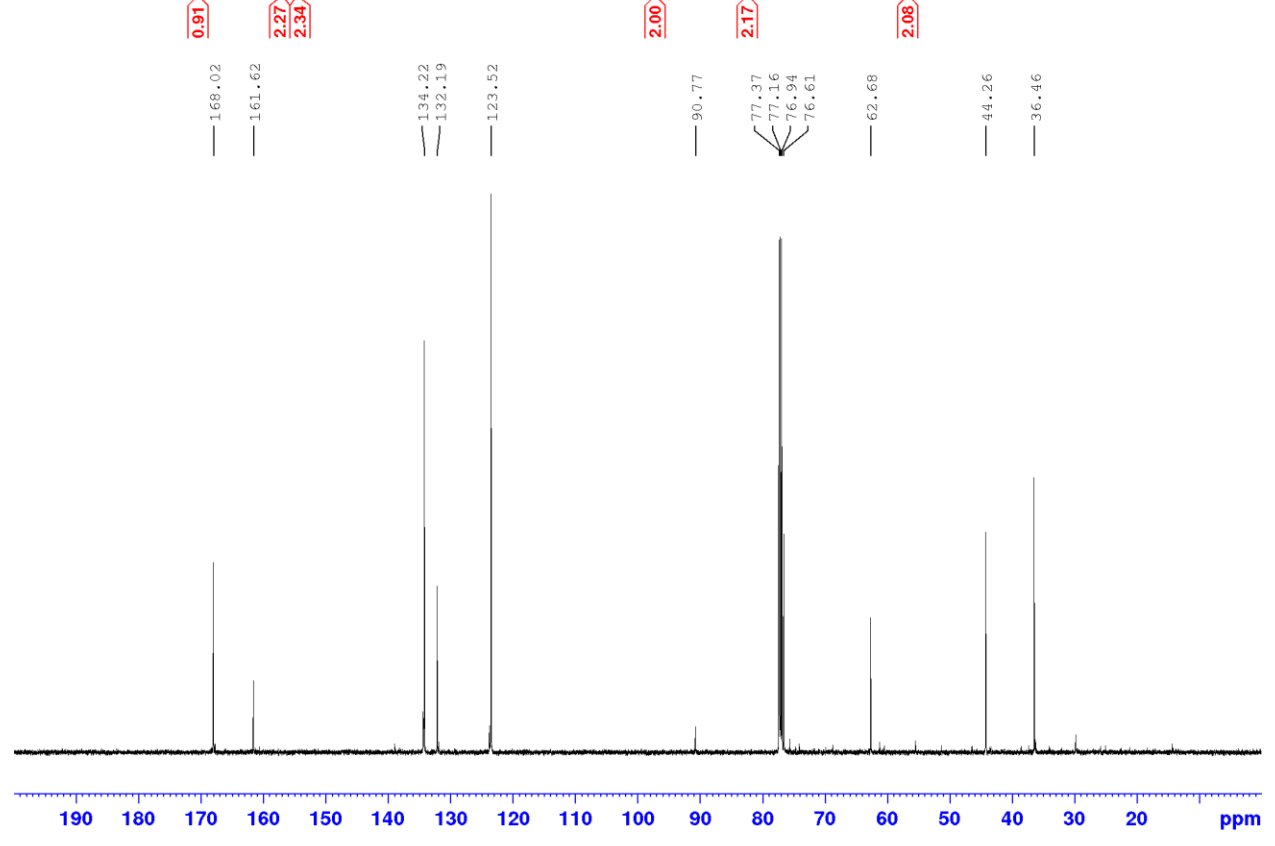

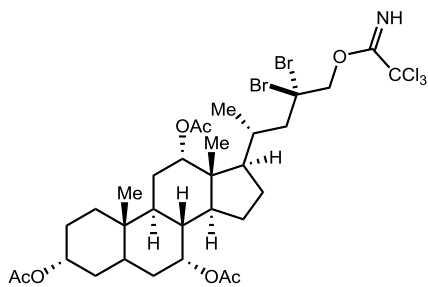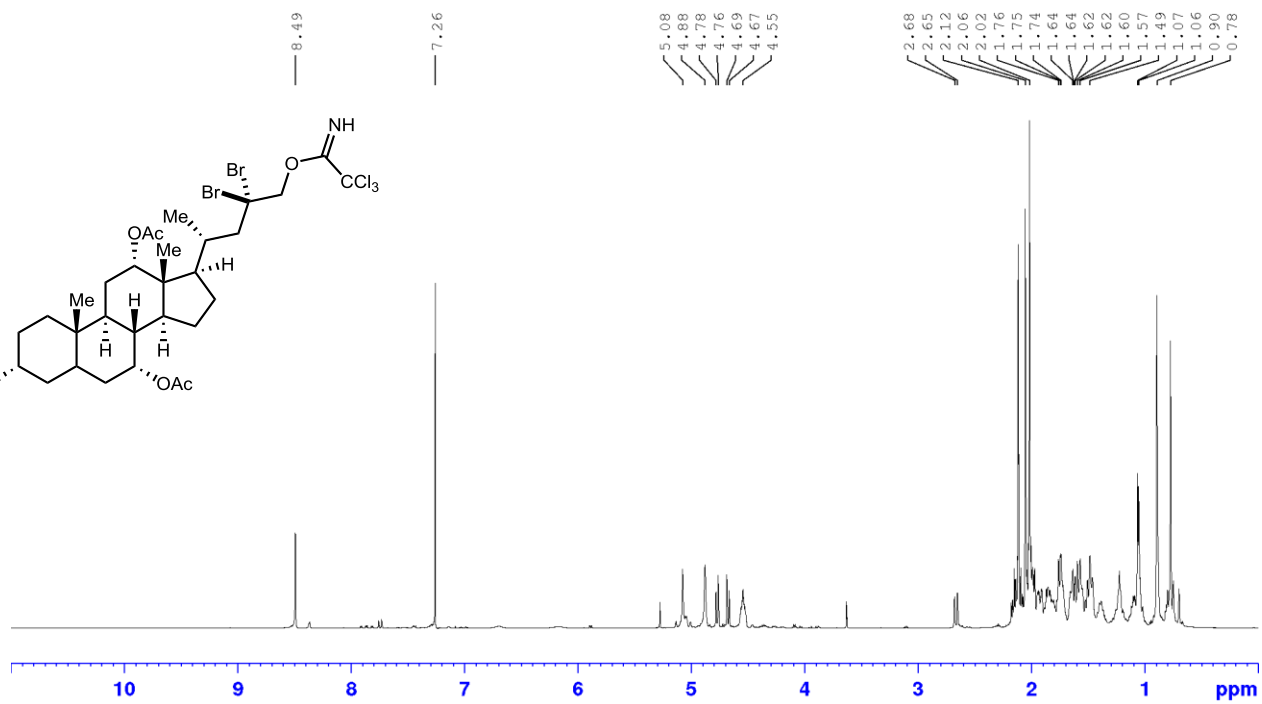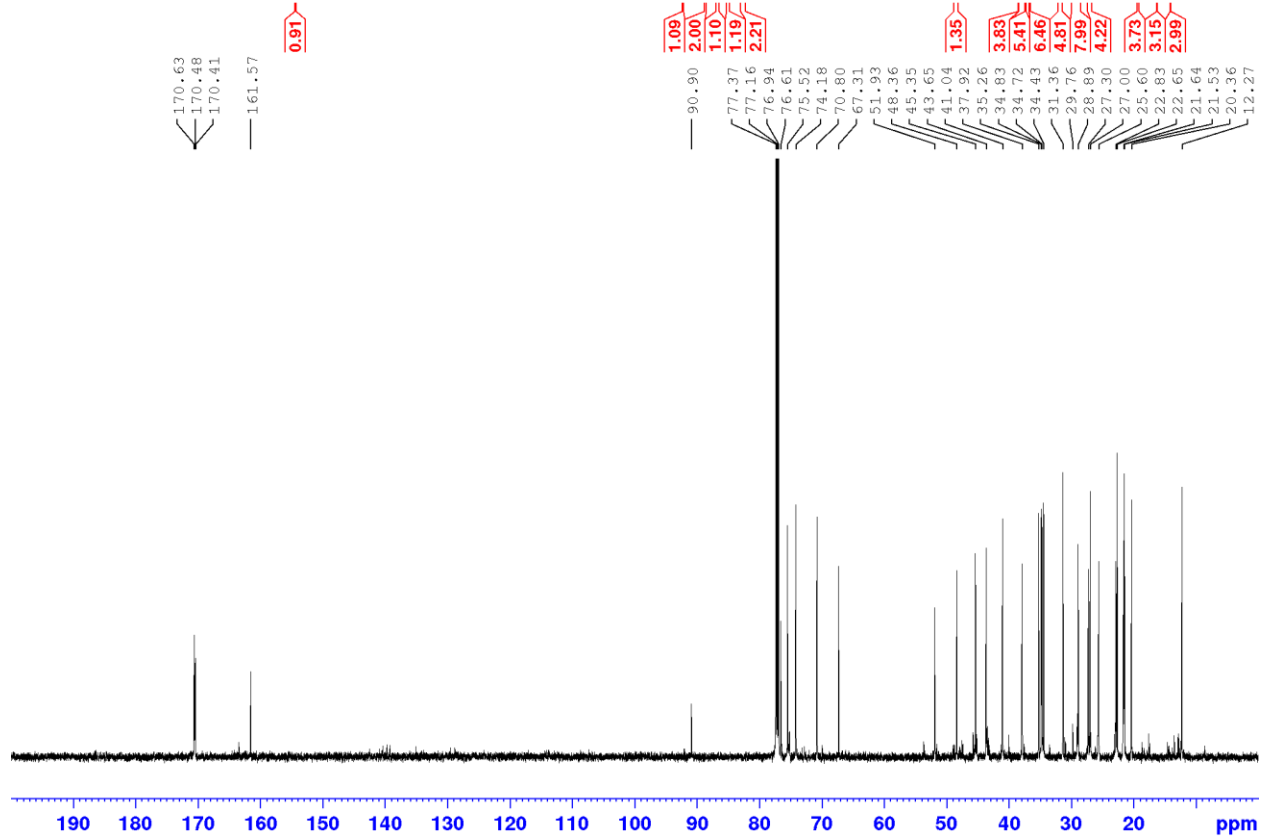

0.91

1.09, 2.00, 1.10, 1.19, 2.21, 1.35, 3.83, 5.41, 6.46, 4.81, 7.99, 4.22, 3.73, 3.15, 2.98

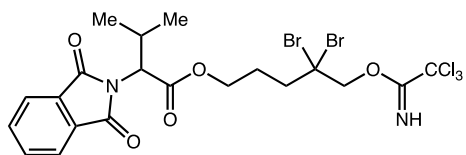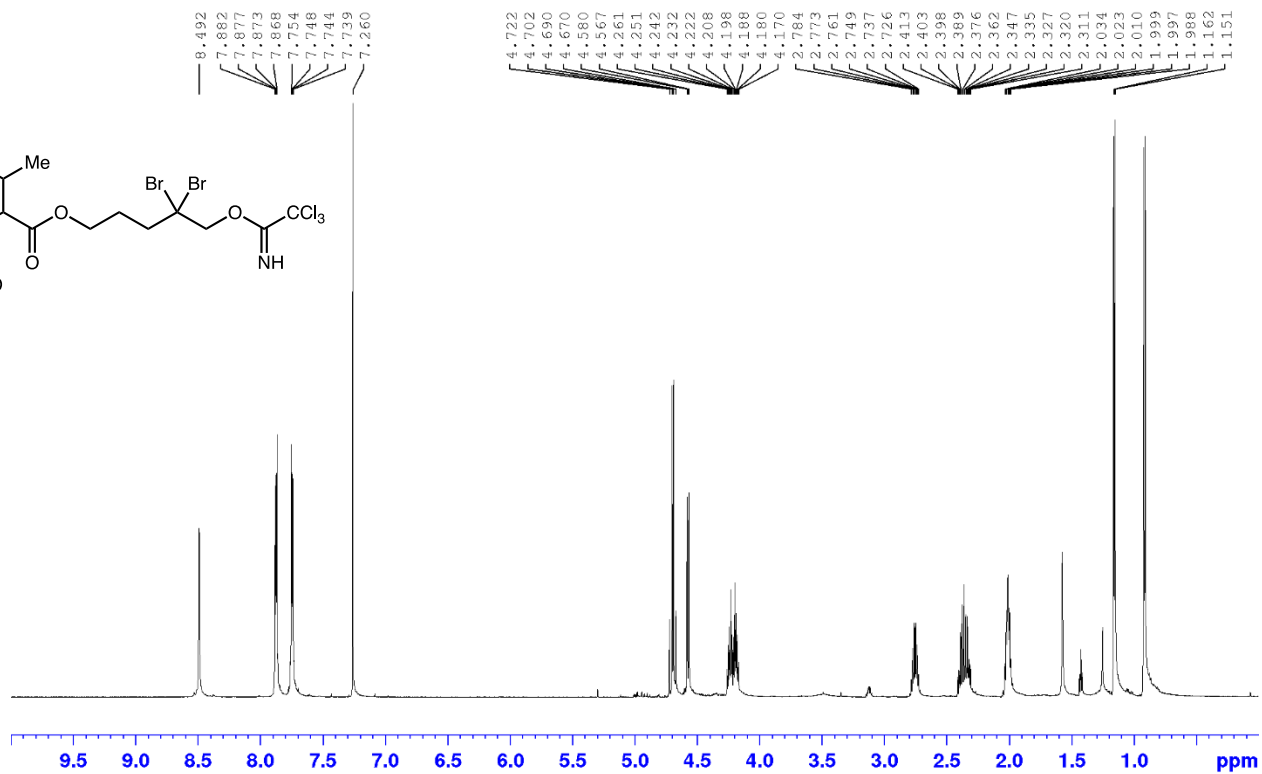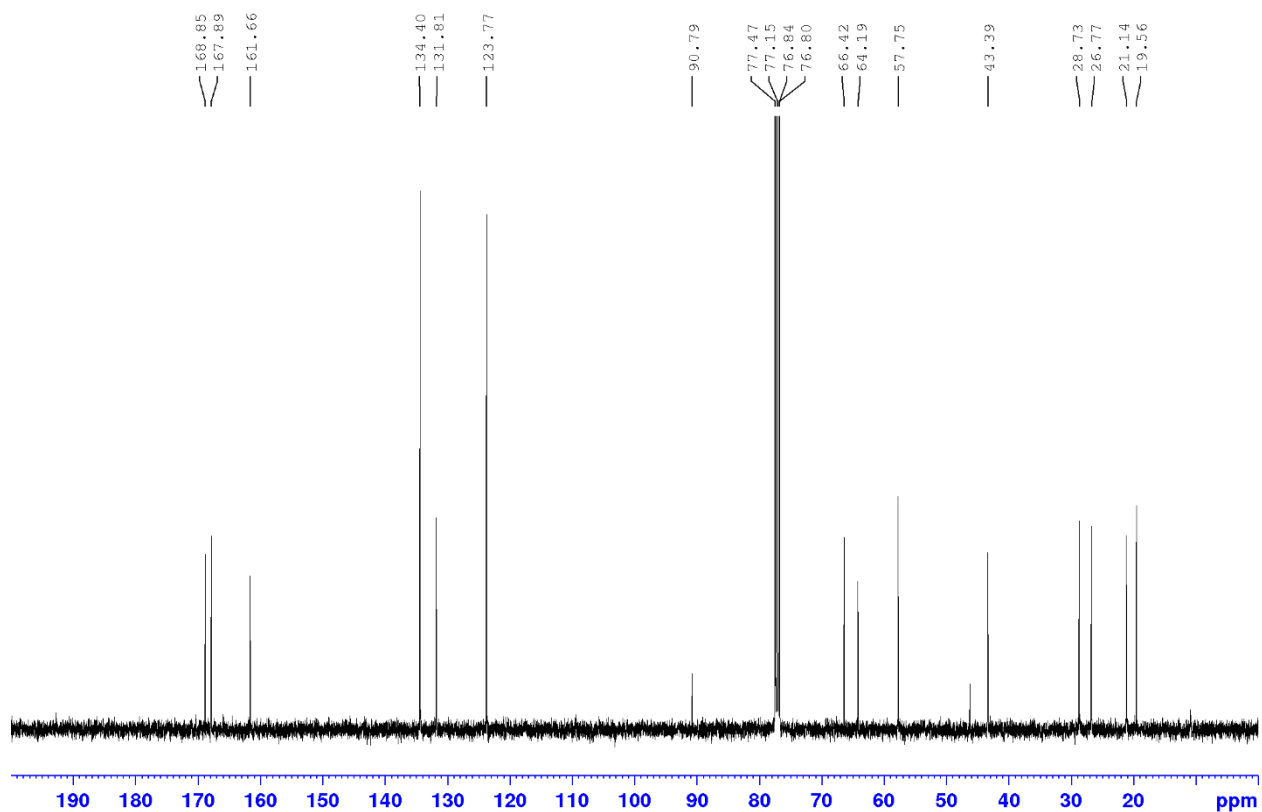



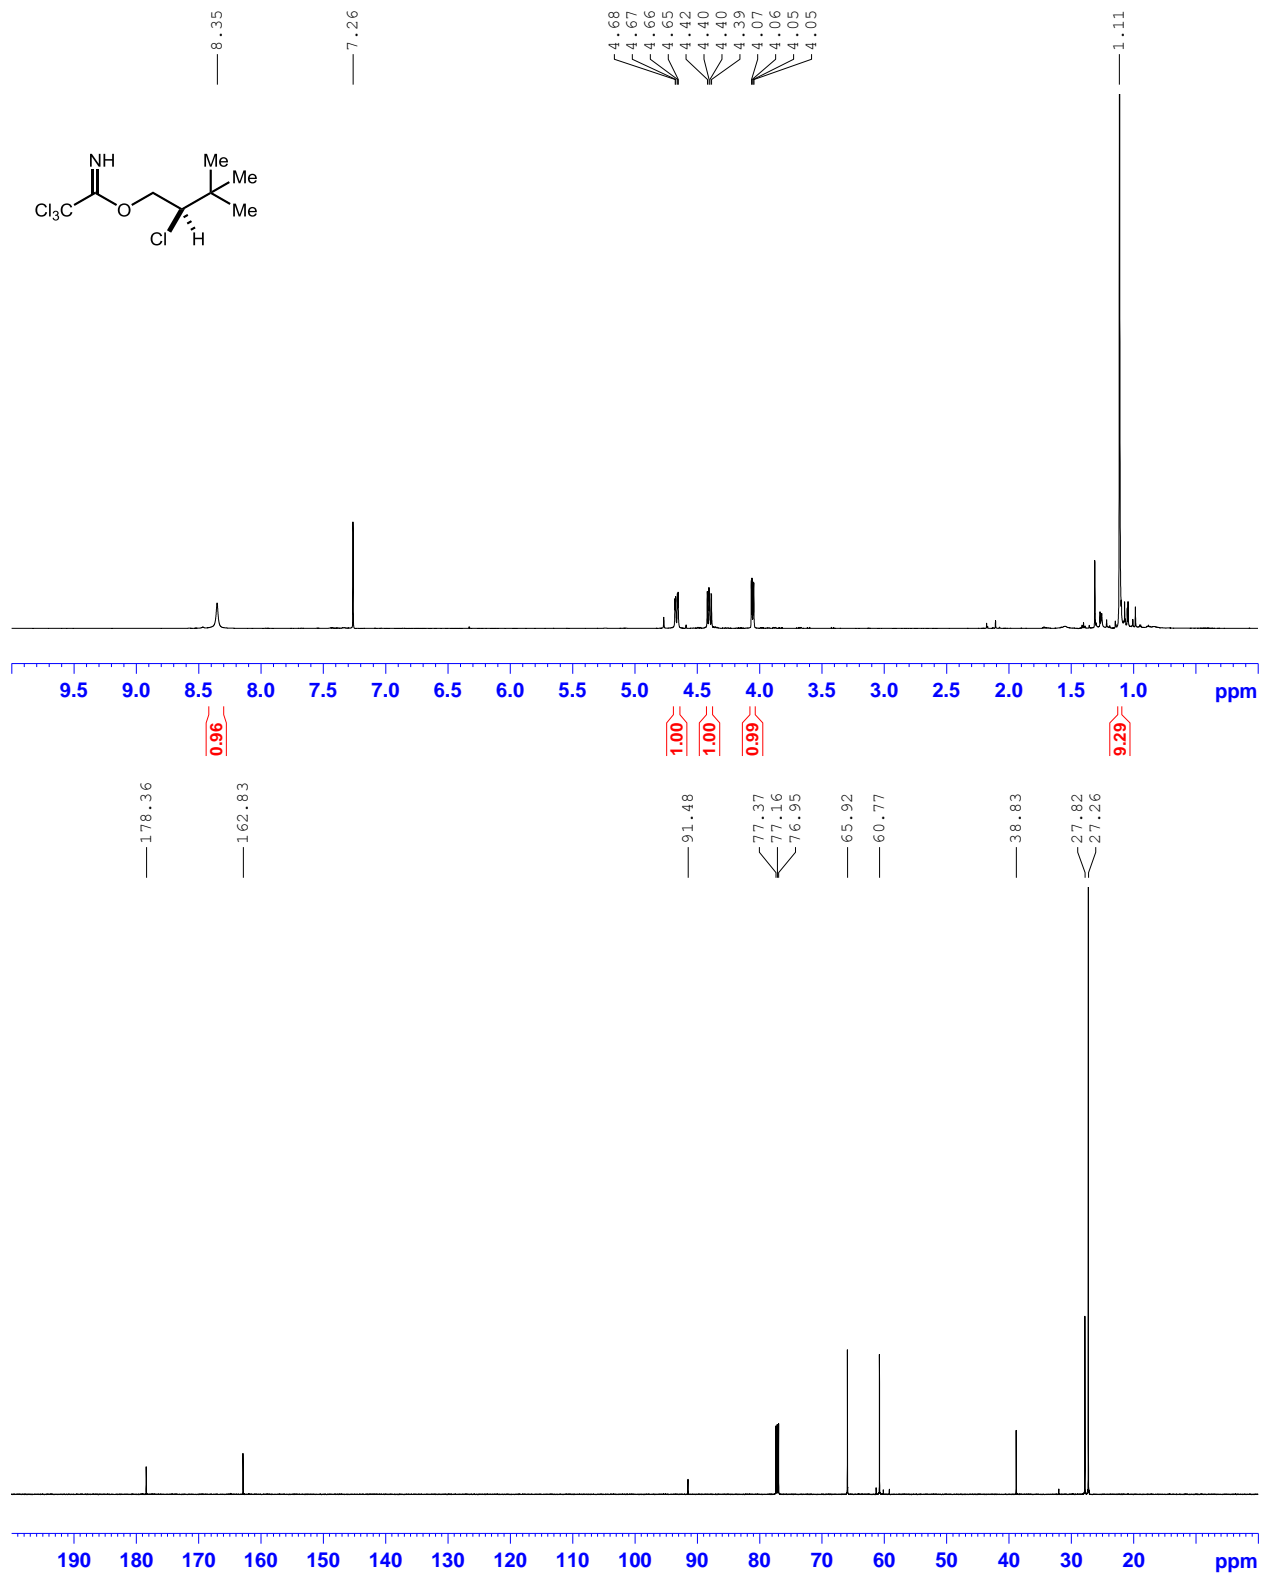

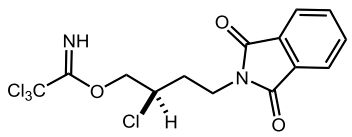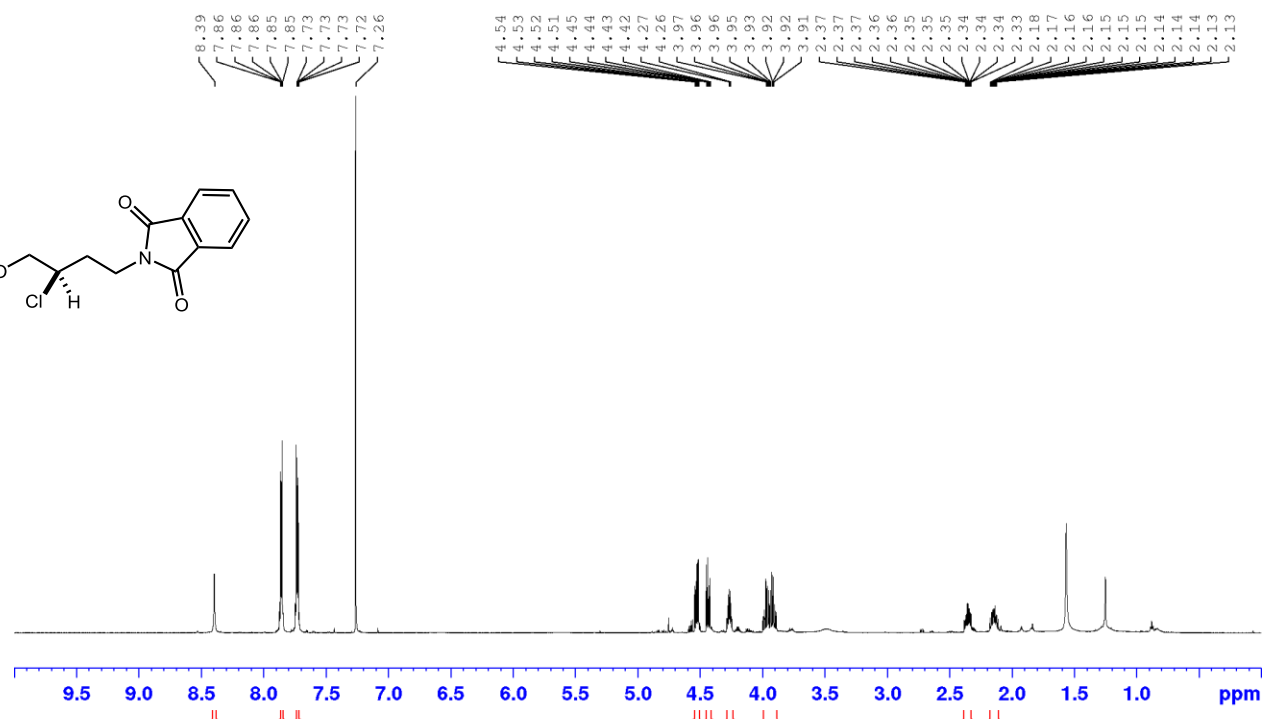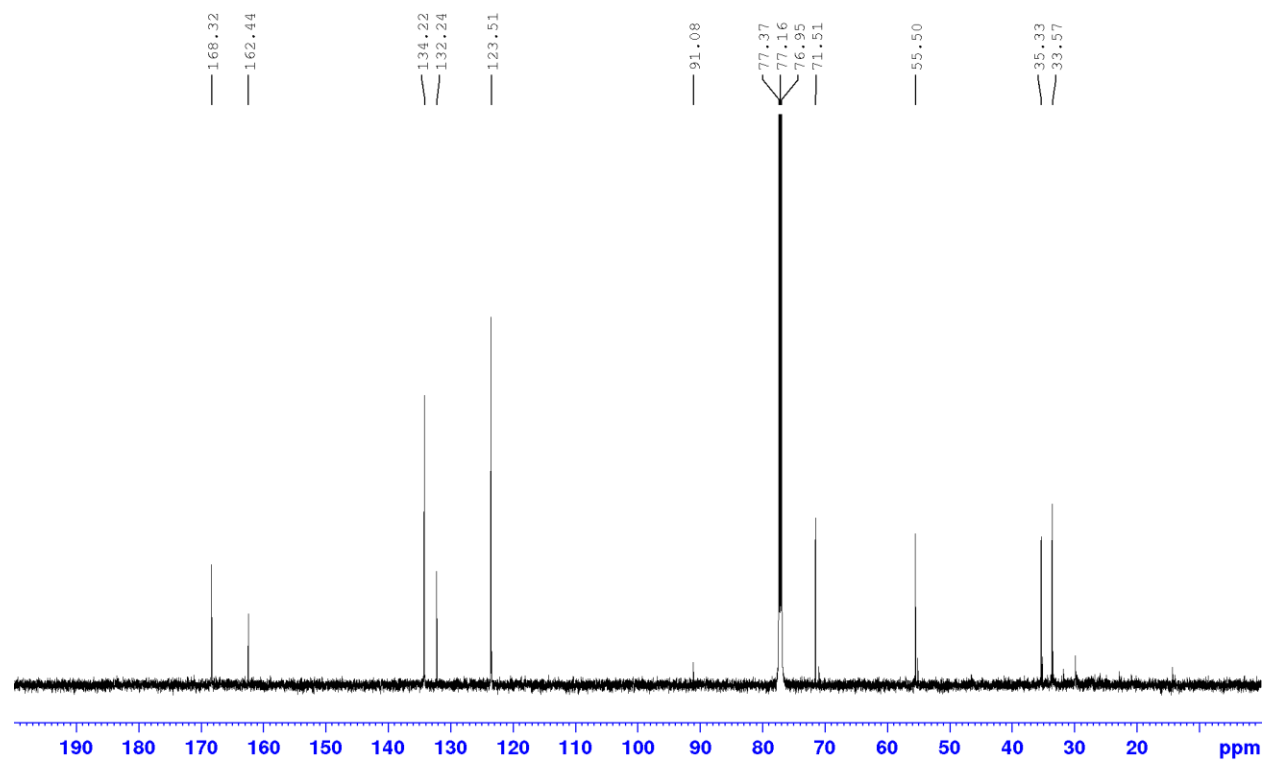

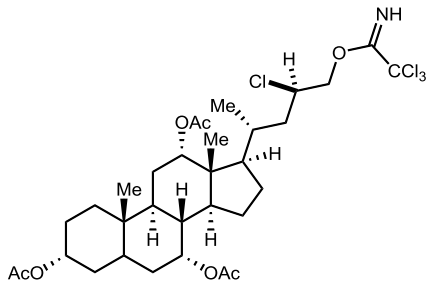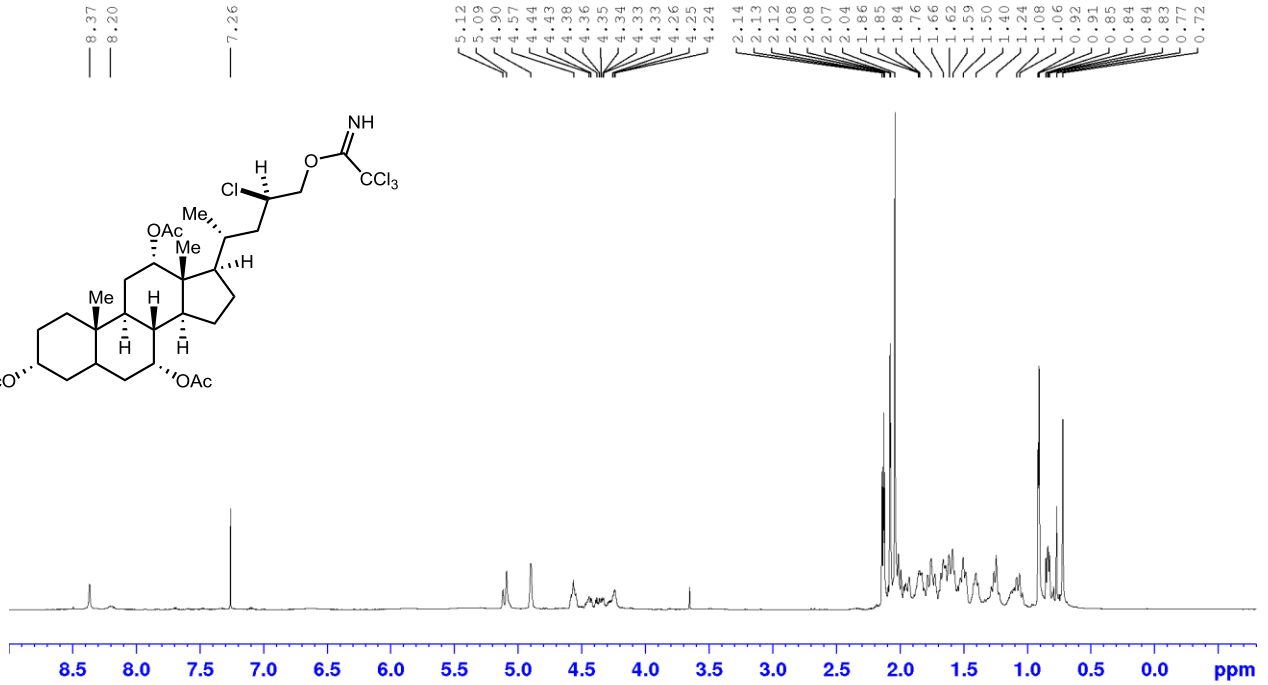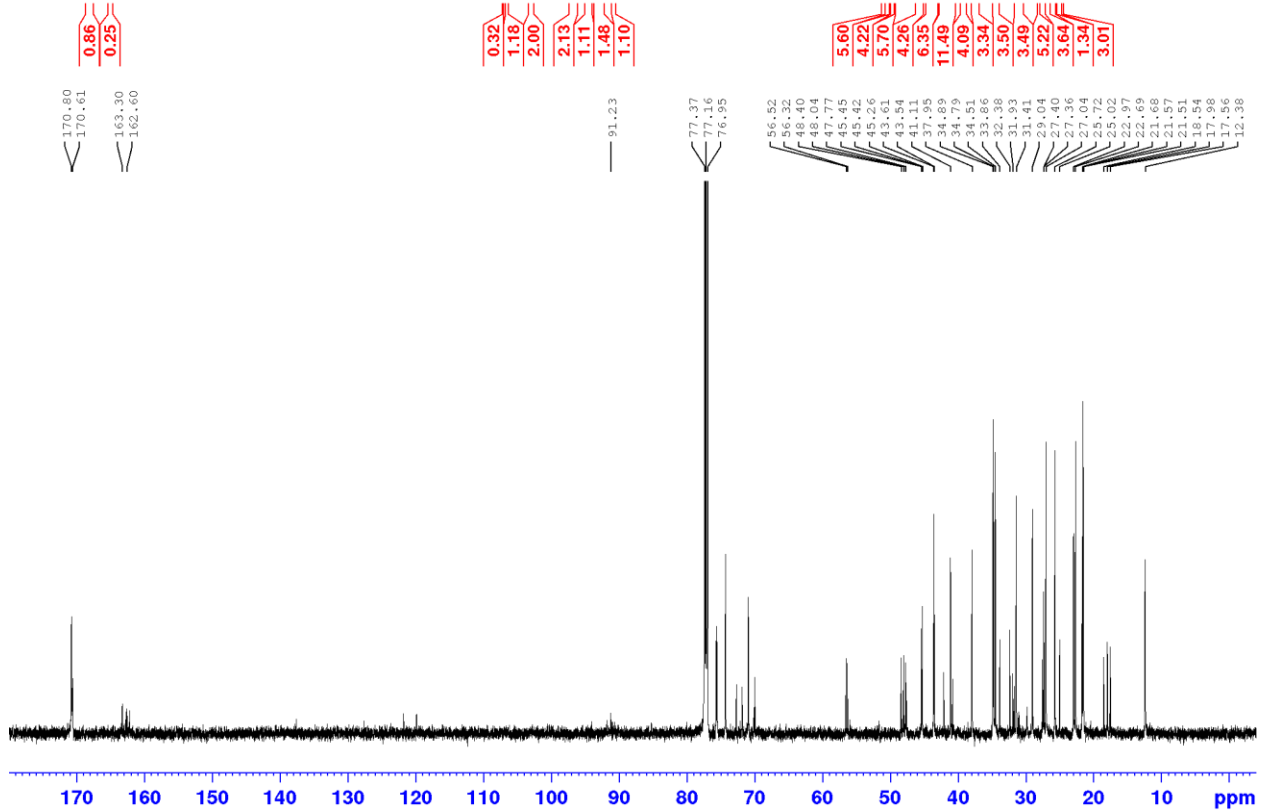

Integration values (red):

- 0.86, 0.25
- 0.32, 1.18, 2.00, 2.13, 1.11, 1.48, 1.10
- 5.60, 4.22, 5.70, 4.96, 6.35, 11.49, 4.09, 3.34, 3.50, 3.49, 5.22, 3.64, 1.34, 3.01

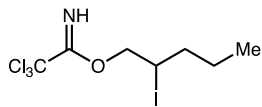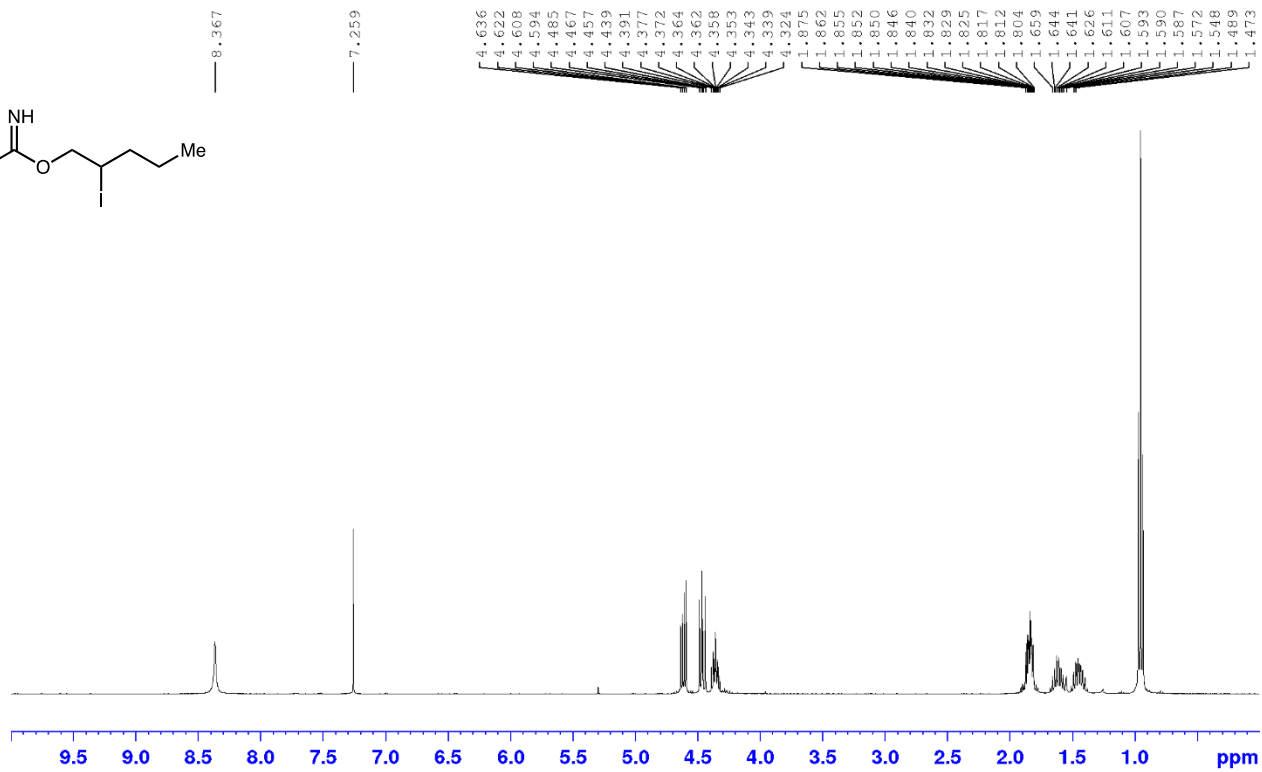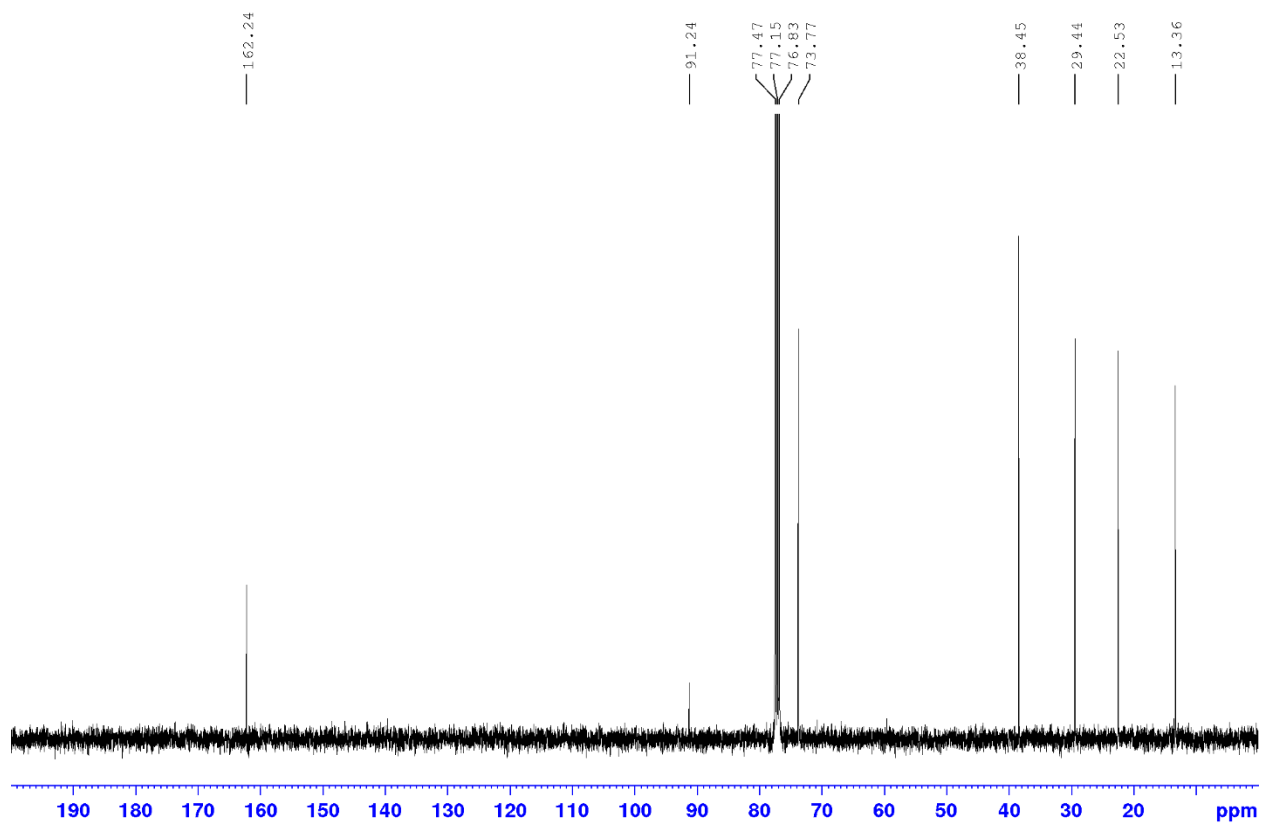

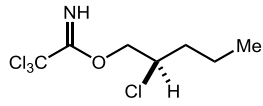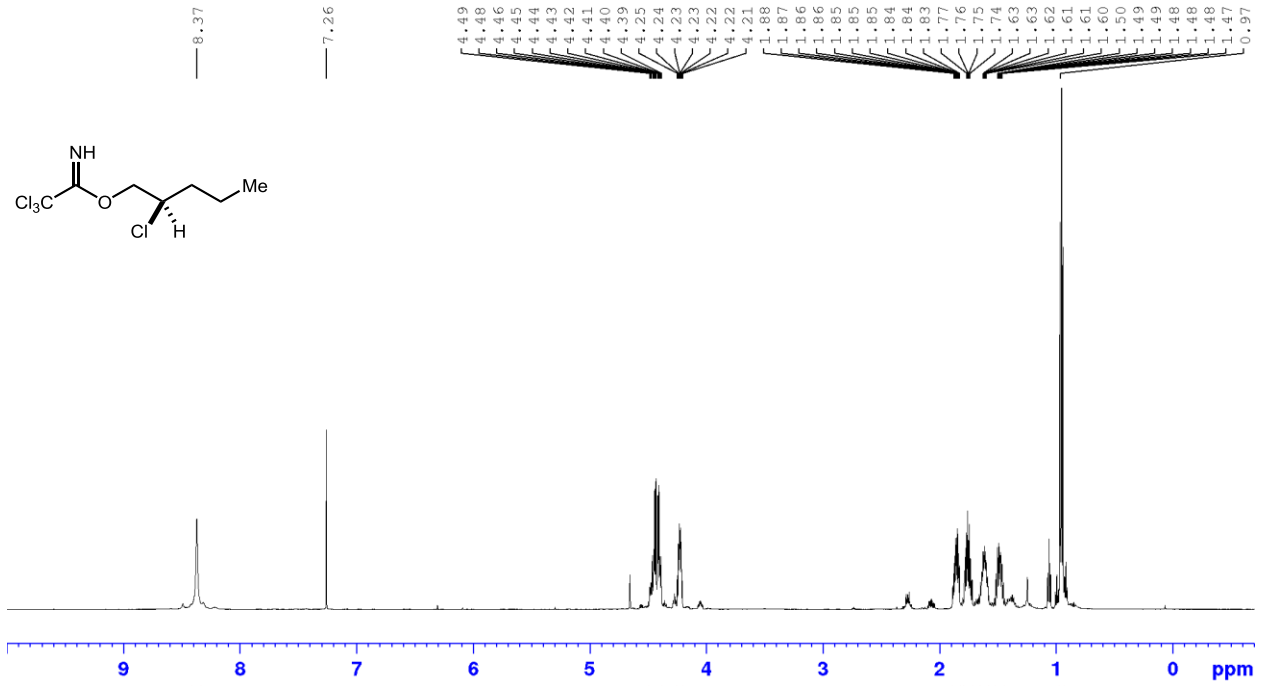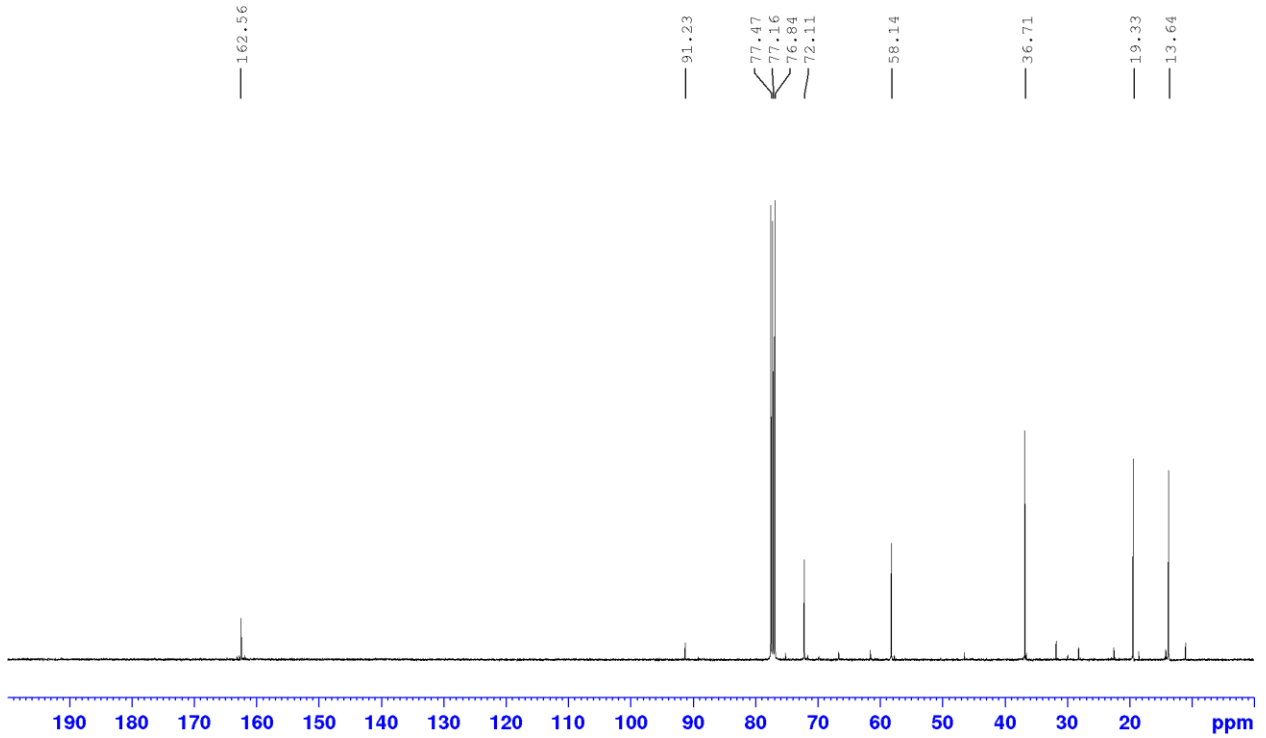

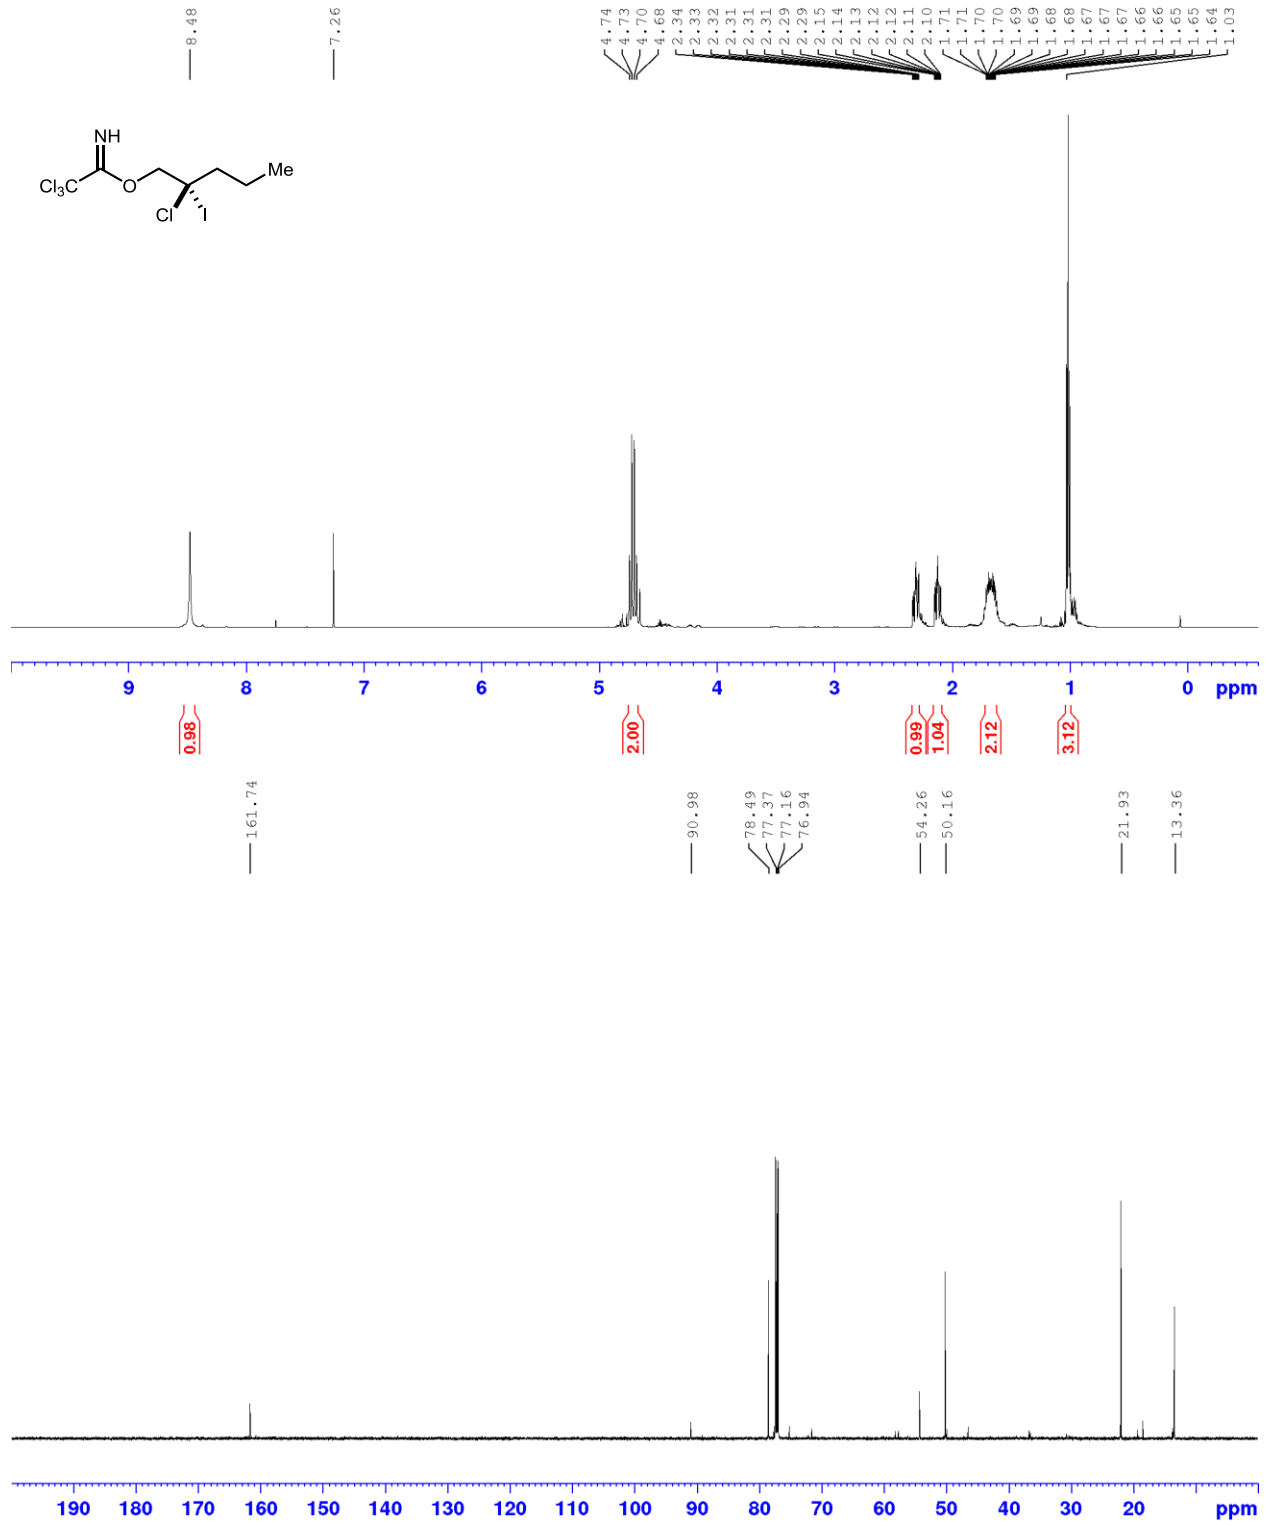

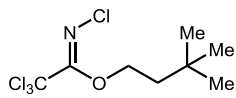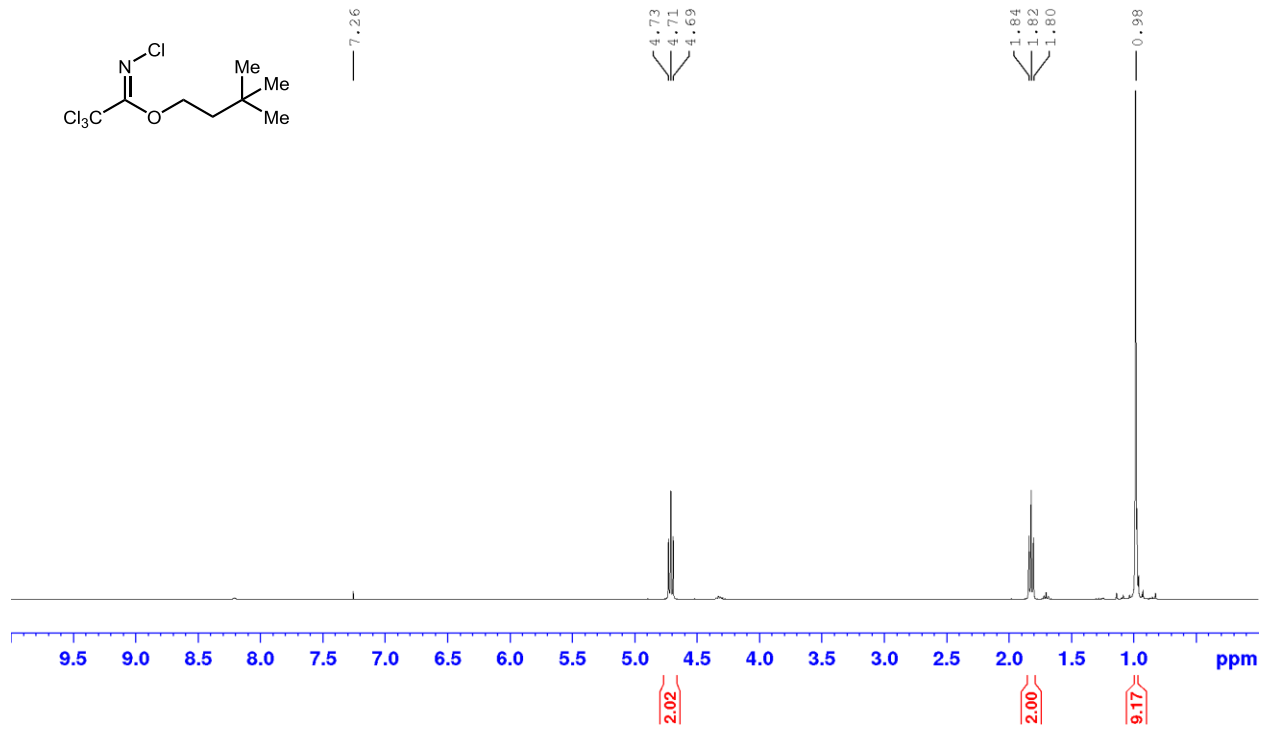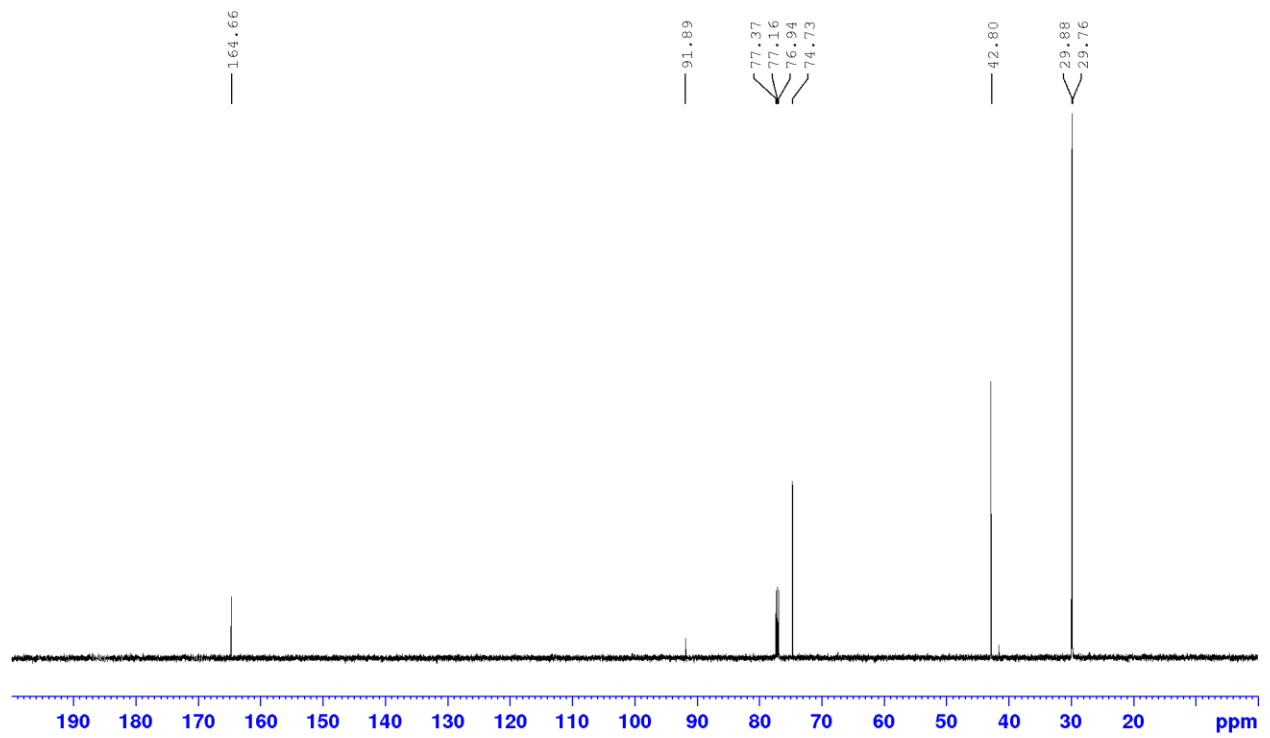

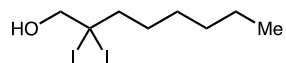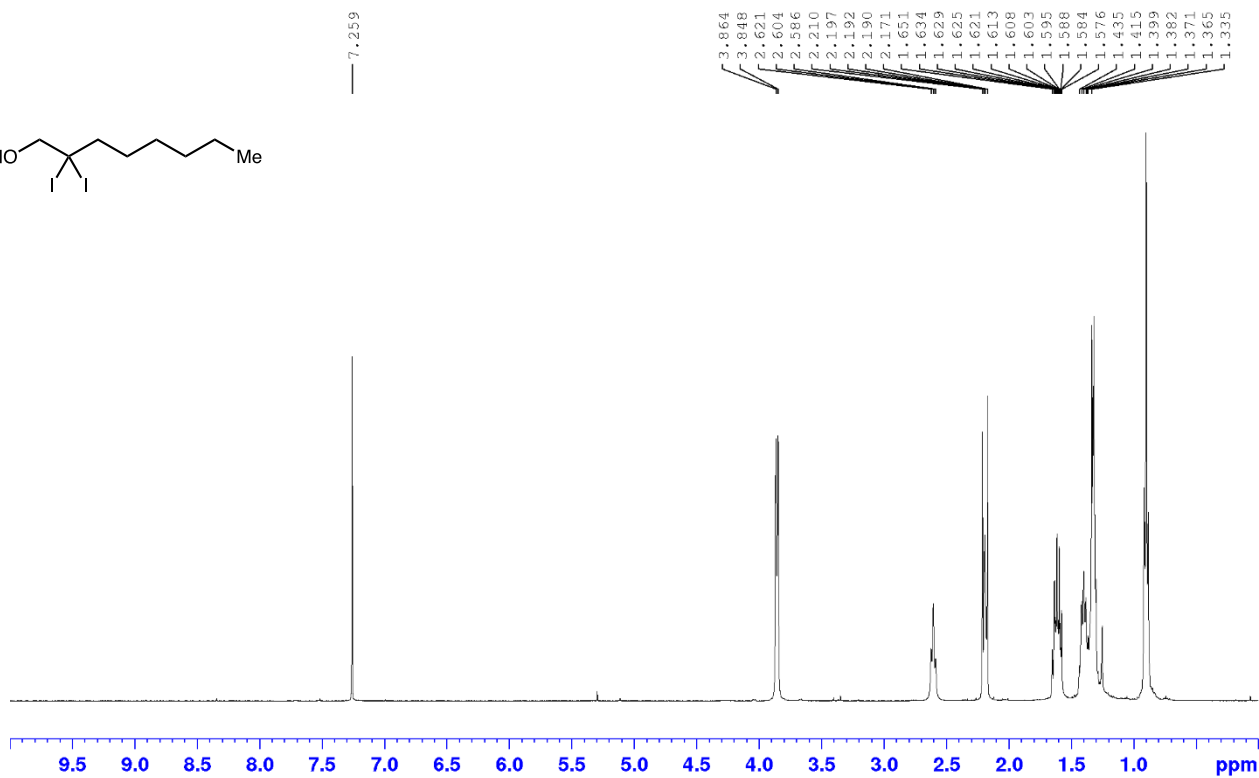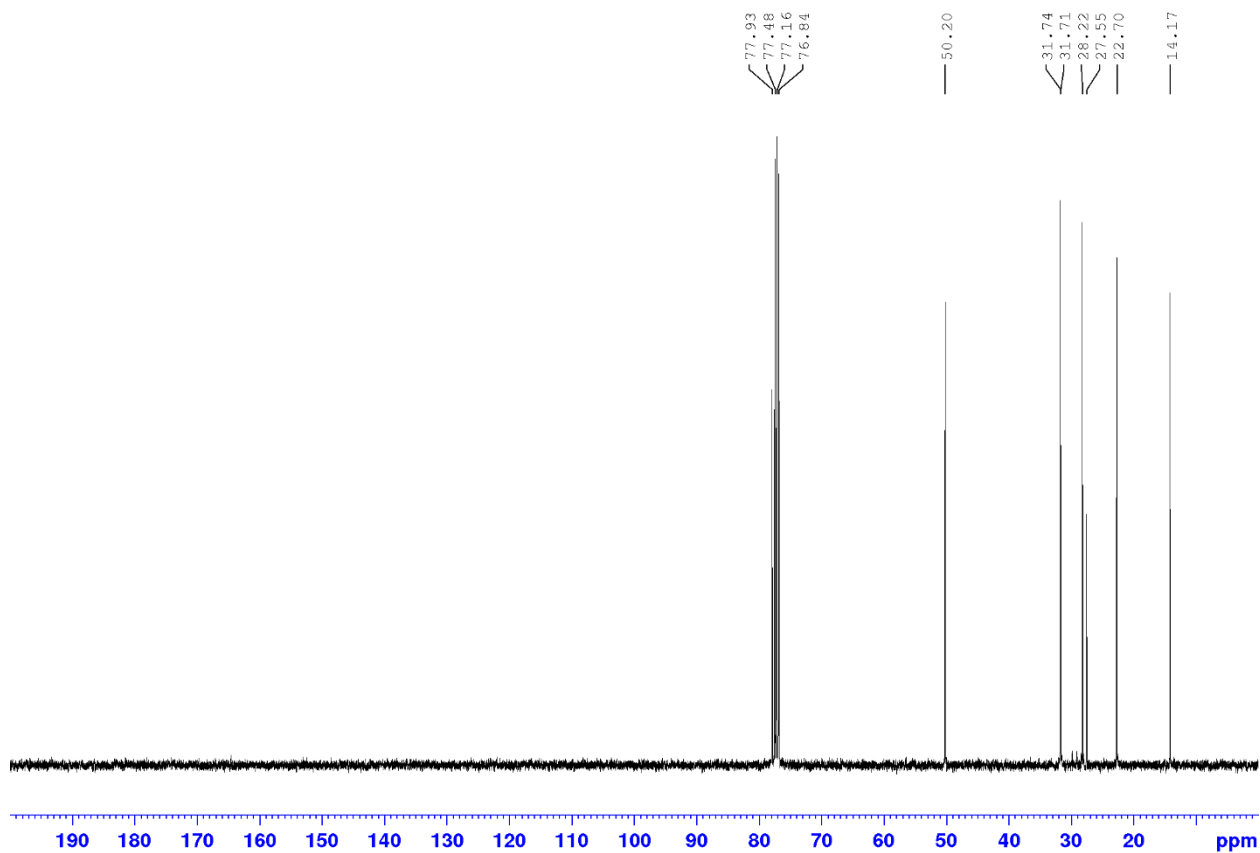



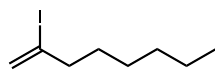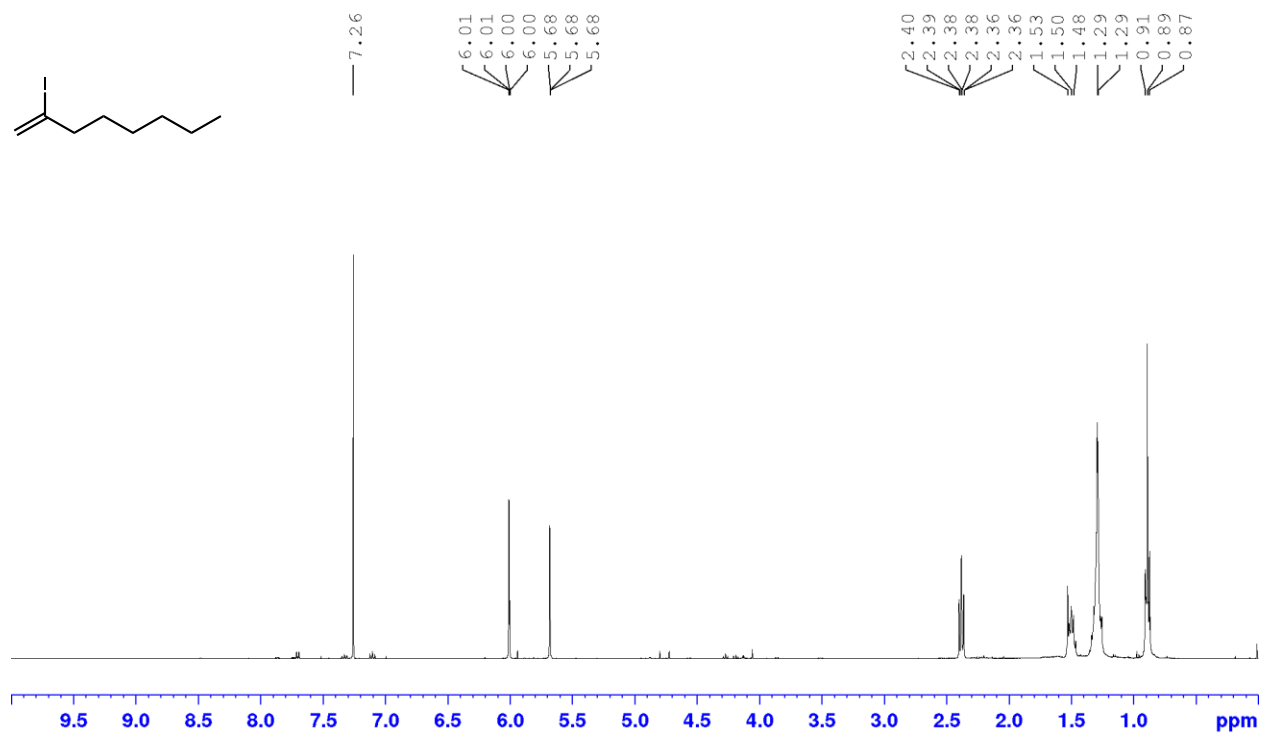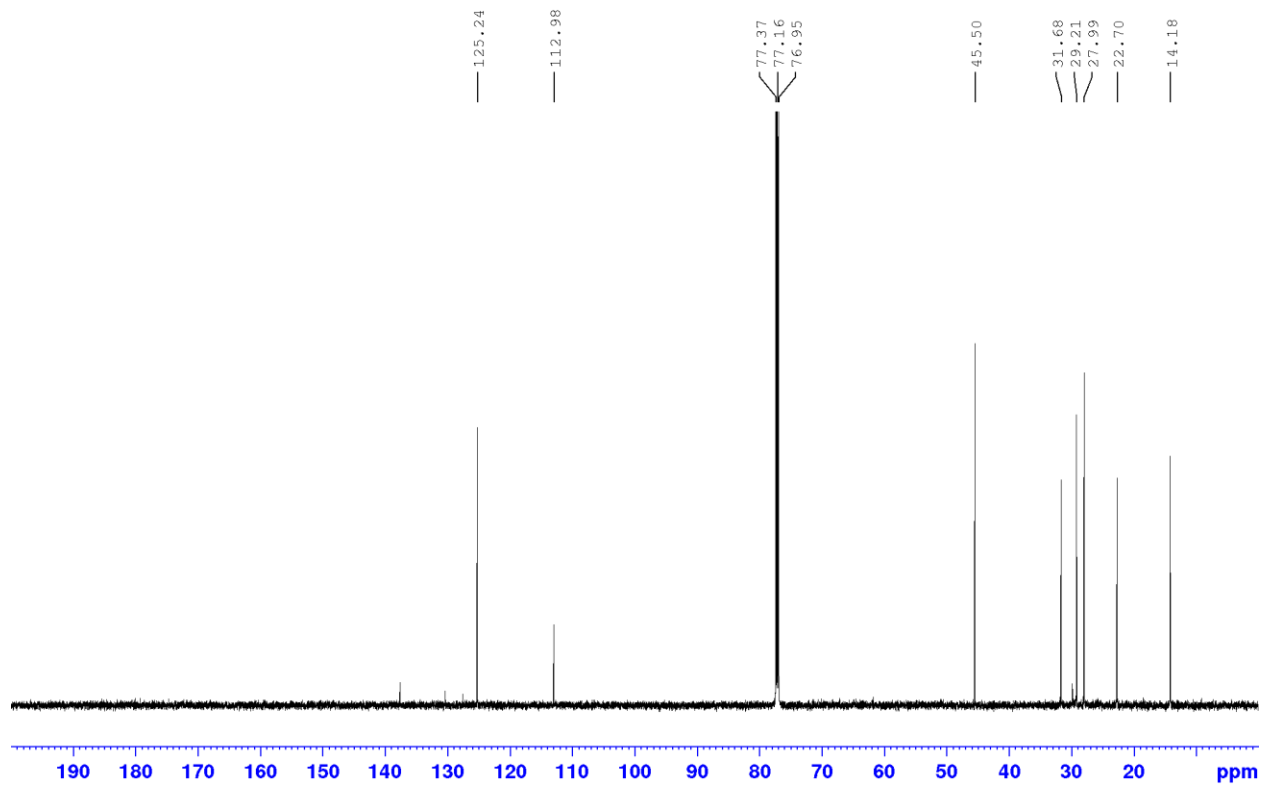

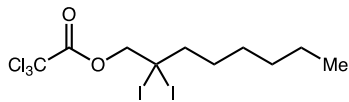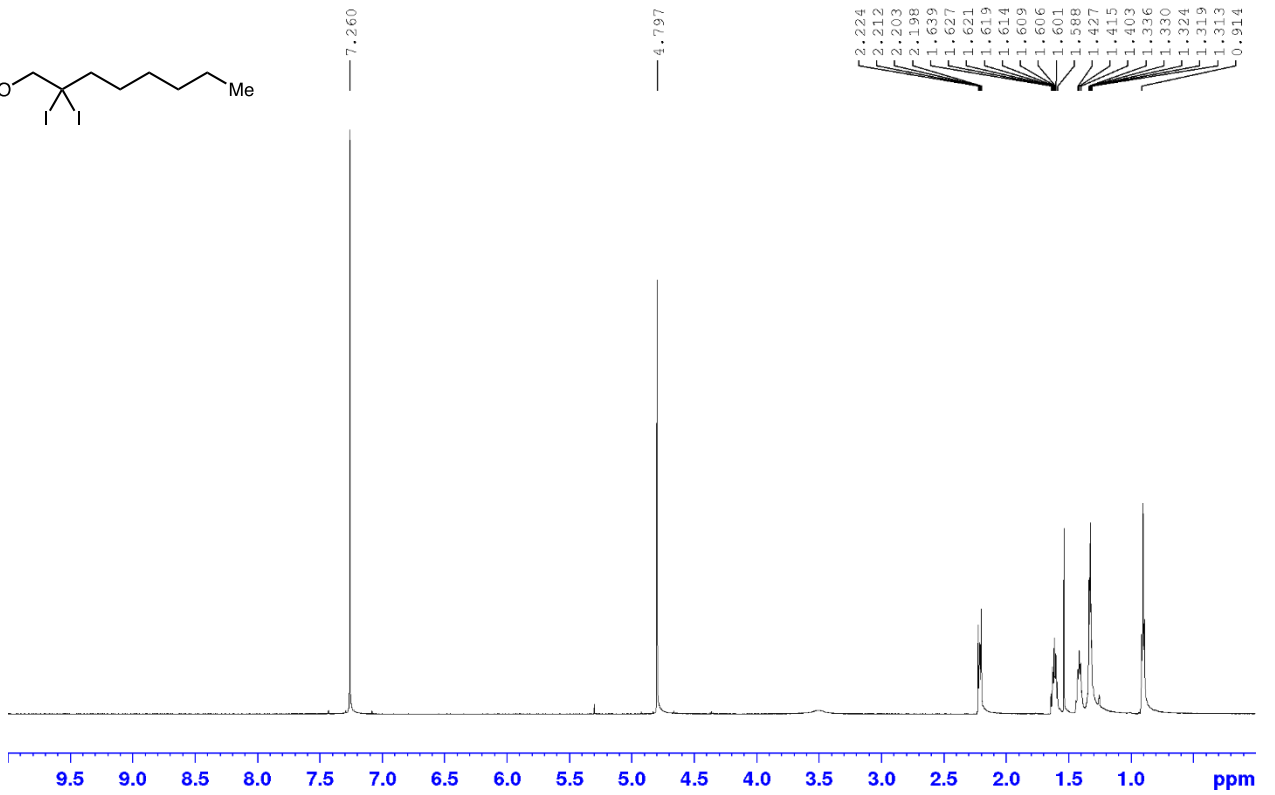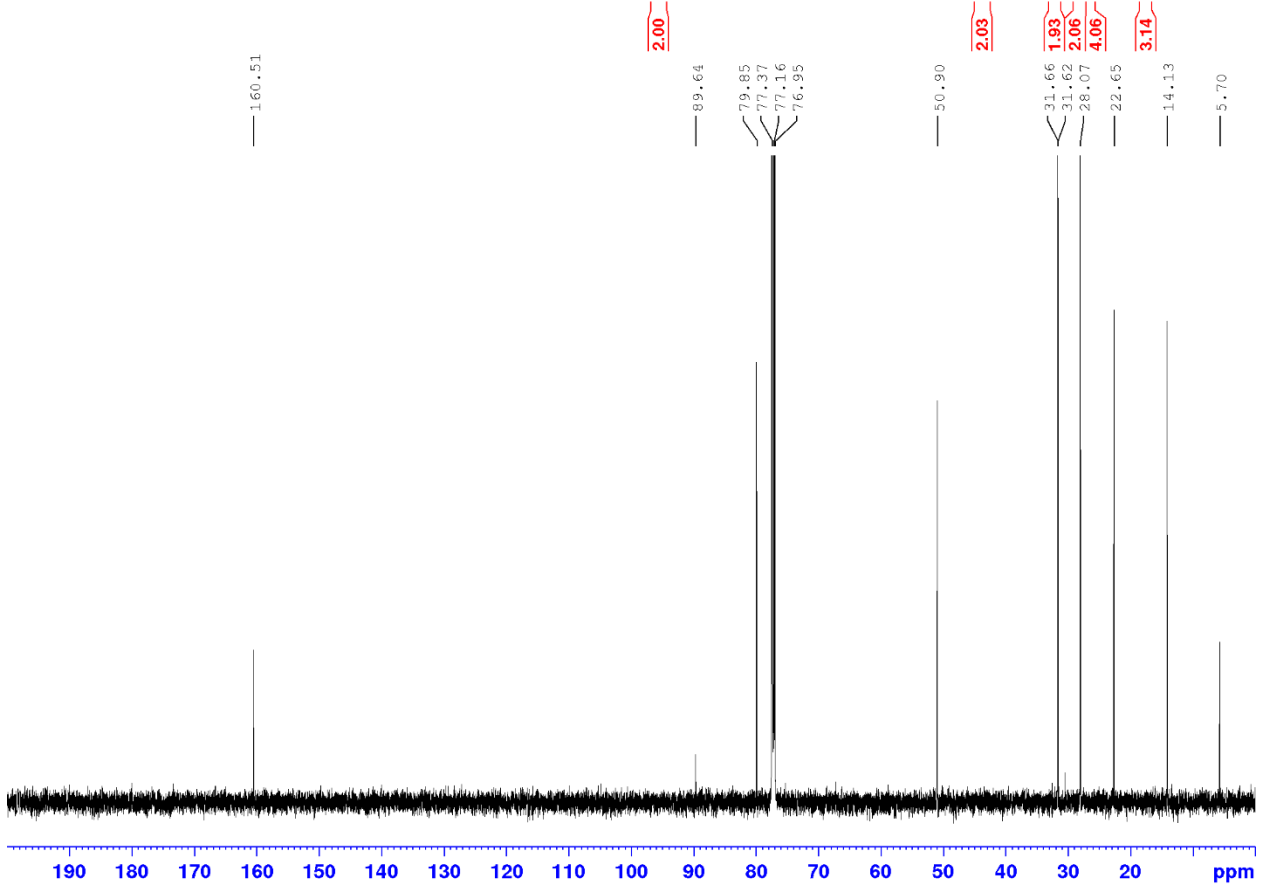

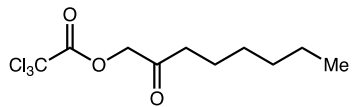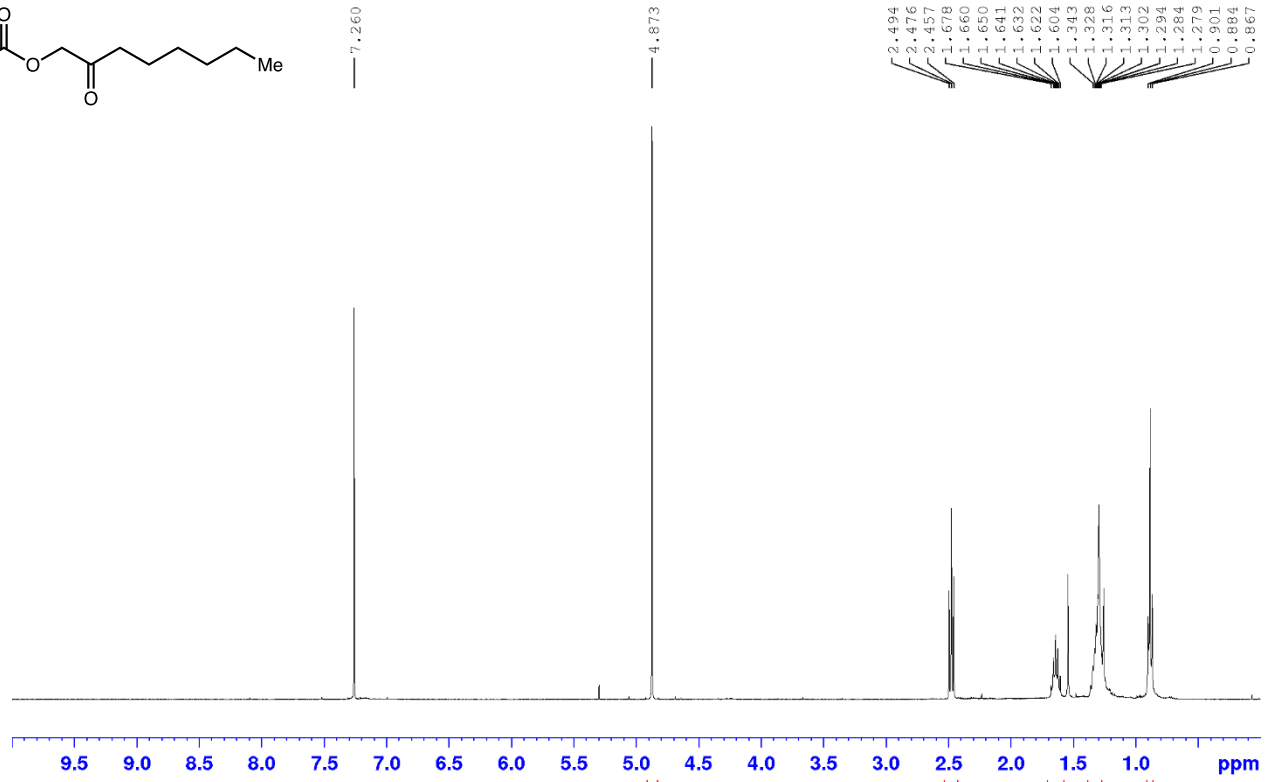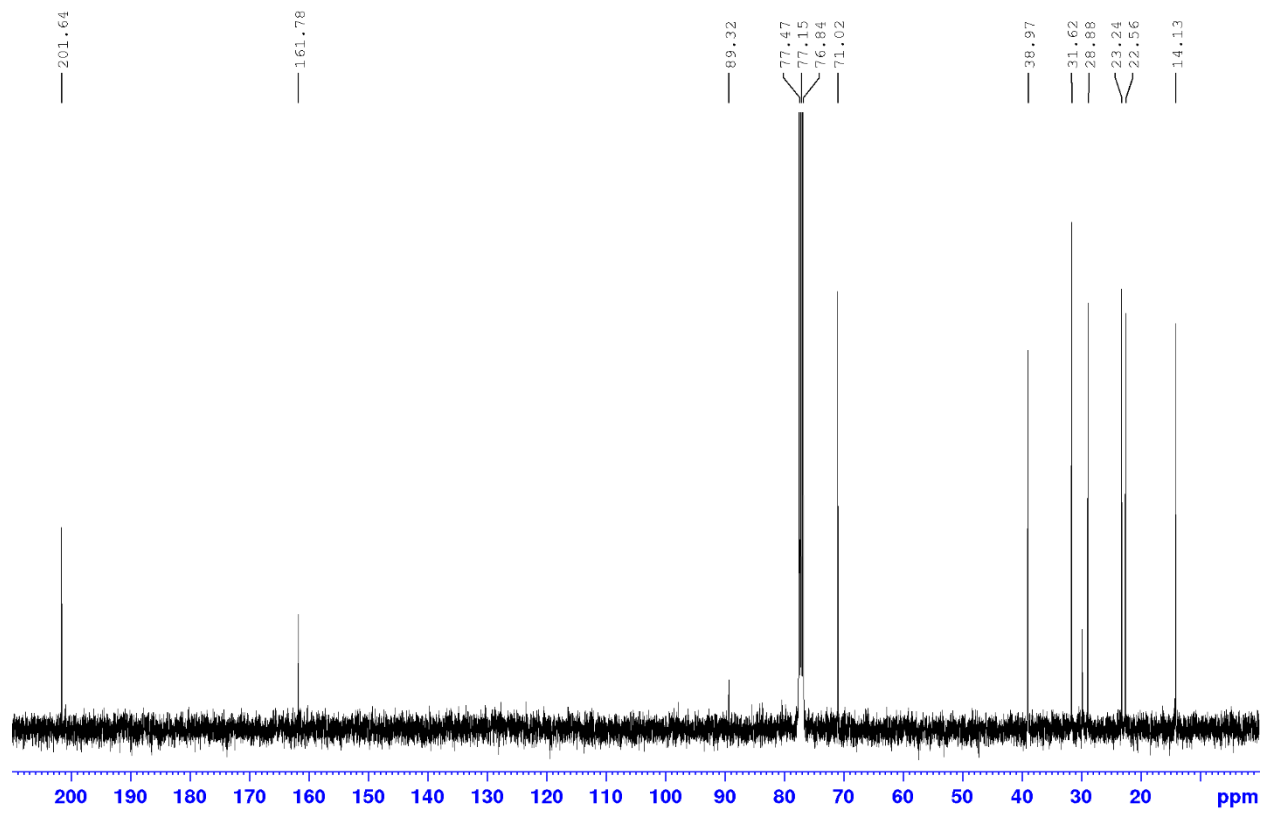

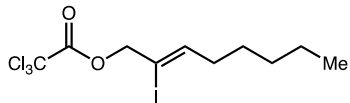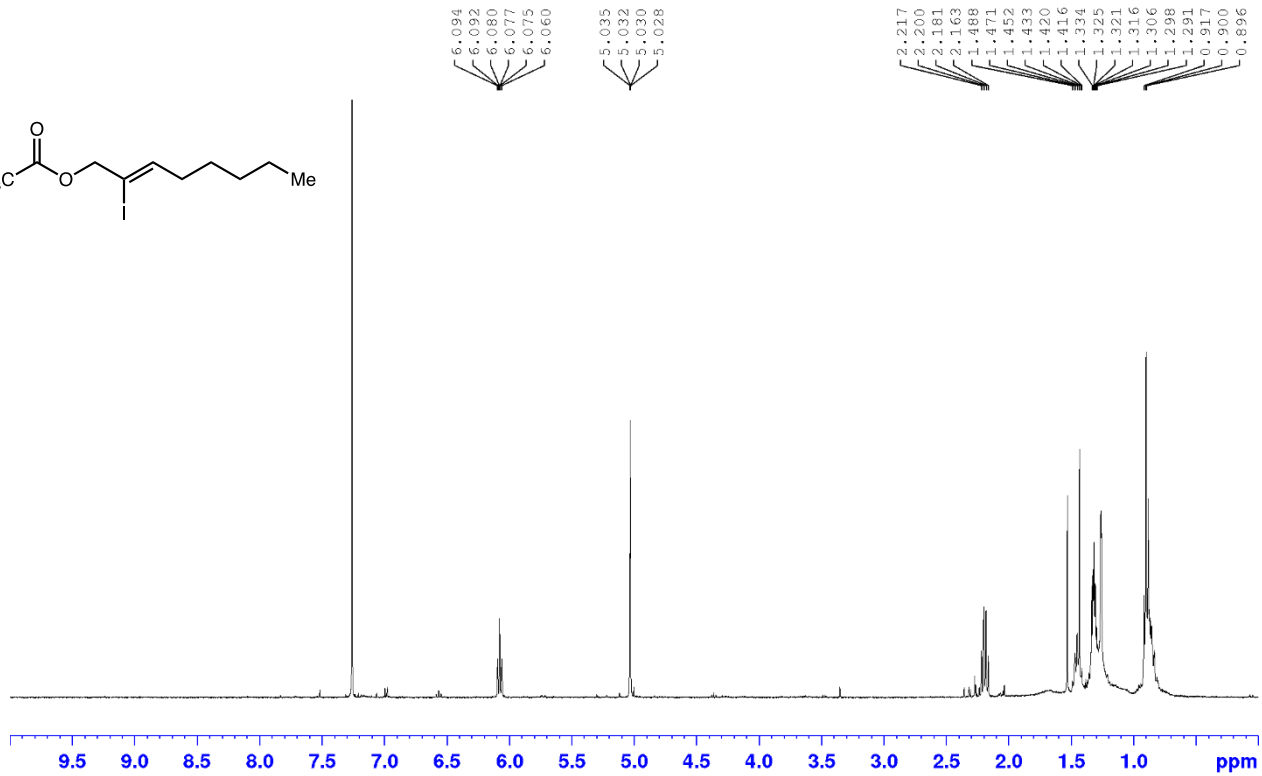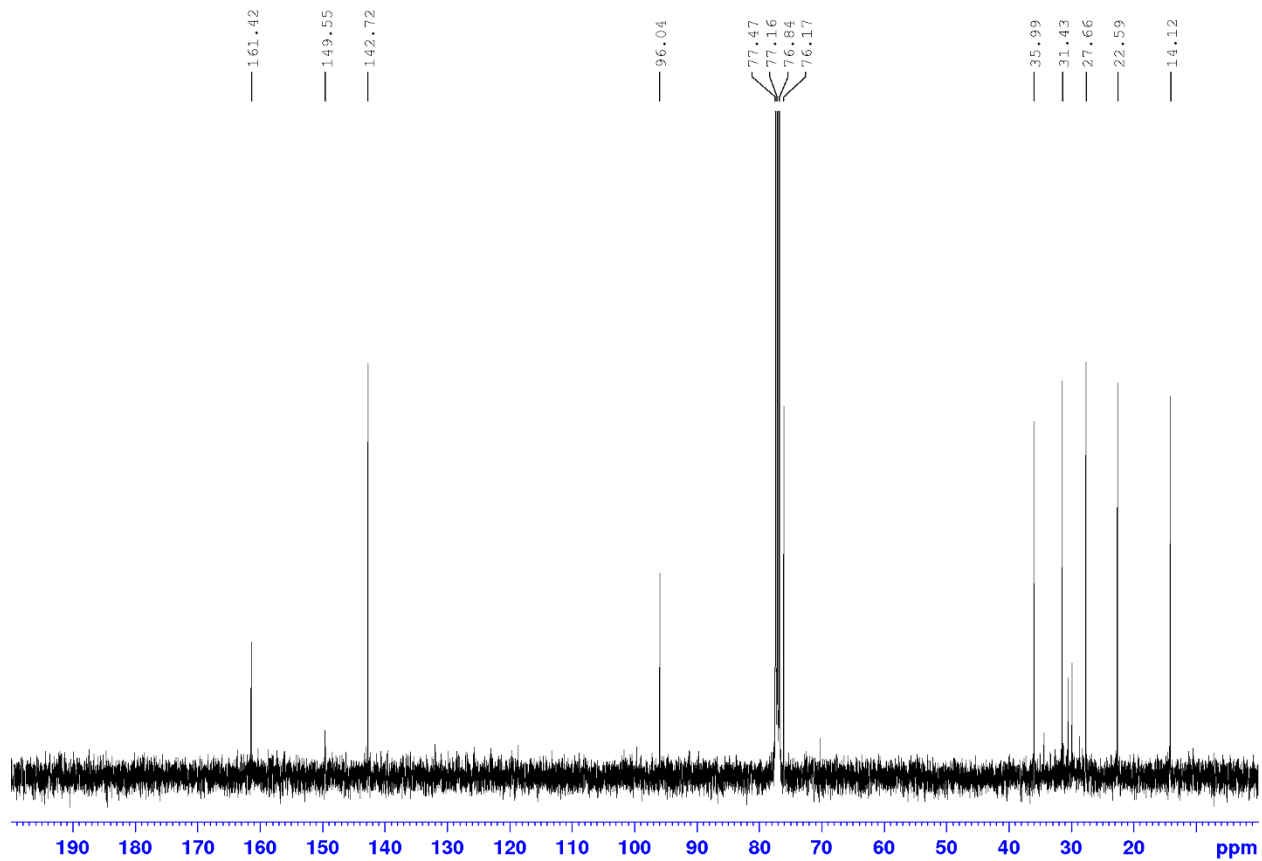

Supplement: c8sc01214h1.pdf [file c8sc01214h1.pdf]
